# Supplementary material for: Global transcriptome changes of elongating internode of sugarcane in response to mepiquat chloride
Source: BMC Genomics. 2021 Jan 25;22:79. doi: 10.1186/s12864-020-07352-w (PMC7831198; doi:10.1186/s12864-020-07352-w)
Supplement: Supplementary file 4 — Additional file 4. GO enrichment analysis of DEGs. [file 12864_2020_7352_MOESM4_ESM.xlsx]

## Sheet: C2-VS-D2_up.P
GO ID	Description	GeneRatio (863)	BgRatio (18330)	pvalue	p.adjust	geneID
GO:0007017	microtubule-based process	36	195	1.5137e-12	1.06262e-09	Isoform0004358;Isoform0019134;Isoform0020430;Isoform0021719;Isoform0023112;Isoform0024629;Isoform0025891;Isoform0027877;Isoform0032298;Isoform0033826;Isoform0035390;Isoform0039029;Isoform0039837;Isoform0041885;Isoform0045696;Isoform0047581;Isoform0047598;Isoform0047923;Isoform0048058;Isoform0048311;Isoform0048516;Isoform0048630;Isoform0048949;Isoform0049160;Isoform0049428;Isoform0049933;Isoform00…
GO:0032392	DNA geometric change	16	68	7.46367e-08	2.15753e-05	Isoform0018637;Isoform0018888;Isoform0020090;Isoform0020933;Isoform0022794;Isoform0025625;Isoform0026309;Isoform0029167;Isoform0029346;Isoform0031169;Isoform0033230;Isoform0044734;Isoform0046498;Isoform0048728;Isoform0059508;Isoform0059616
GO:0071103	DNA conformation change	16	70	1.15303e-07	2.15753e-05	Isoform0018637;Isoform0018888;Isoform0020090;Isoform0020933;Isoform0022794;Isoform0025625;Isoform0026309;Isoform0029167;Isoform0029346;Isoform0031169;Isoform0033230;Isoform0044734;Isoform0046498;Isoform0048728;Isoform0059508;Isoform0059616
GO:0006259	DNA metabolic process	58	595	1.22936e-07	2.15753e-05	Isoform0002058;Isoform0005488;Isoform0005631;Isoform0018637;Isoform0018888;Isoform0019267;Isoform0020090;Isoform0020933;Isoform0022794;Isoform0023112;Isoform0025625;Isoform0026309;Isoform0027053;Isoform0027877;Isoform0029167;Isoform0029346;Isoform0031169;Isoform0033230;Isoform0034254;Isoform0039029;Isoform0041177;Isoform0041885;Isoform0046003;Isoform0046498;Isoform0047454;Isoform0047473;Isoform00…
GO:0009687	abscisic acid metabolic process	8	19	1.1114e-06	0.000111457	Isoform0003958;Isoform0004280;Isoform0019694;Isoform0022243;Isoform0029477;Isoform0033596;Isoform0037447;Isoform0037849
GO:0043288	apocarotenoid metabolic process	8	19	1.1114e-06	0.000111457	Isoform0003958;Isoform0004280;Isoform0019694;Isoform0022243;Isoform0029477;Isoform0033596;Isoform0037447;Isoform0037849
GO:1902644	tertiary alcohol metabolic process	8	19	1.1114e-06	0.000111457	Isoform0003958;Isoform0004280;Isoform0019694;Isoform0022243;Isoform0029477;Isoform0033596;Isoform0037447;Isoform0037849
GO:0007049	cell cycle	31	260	1.97266e-06	0.000173101	Isoform0001242;Isoform0002409;Isoform0002456;Isoform0007748;Isoform0010779;Isoform0011439;Isoform0012723;Isoform0012945;Isoform0018515;Isoform0018637;Isoform0018888;Isoform0026866;Isoform0032732;Isoform0033799;Isoform0037218;Isoform0041810;Isoform0042725;Isoform0044622;Isoform0046003;Isoform0047579;Isoform0048630;Isoform0048728;Isoform0052183;Isoform0052253;Isoform0053308;Isoform0056149;Isoform00…
GO:0009892	negative regulation of metabolic process	28	253	2.47264e-05	0.00192866	Isoform0011044;Isoform0017833;Isoform0019040;Isoform0022440;Isoform0025625;Isoform0028323;Isoform0033230;Isoform0038291;Isoform0044734;Isoform0045948;Isoform0046003;Isoform0046142;Isoform0046175;Isoform0047273;Isoform0047519;Isoform0047692;Isoform0048426;Isoform0048630;Isoform0049179;Isoform0049420;Isoform0049997;Isoform0056152;Isoform0057738;Isoform0059508;Isoform0065738;Isoform0065853;Isoform00…
GO:0006714	sesquiterpenoid metabolic process	8	29	4.14627e-05	0.00233535	Isoform0003958;Isoform0004280;Isoform0019694;Isoform0022243;Isoform0029477;Isoform0033596;Isoform0037447;Isoform0037849
GO:0000460	maturation of 5.8S rRNA	5	10	4.7273e-05	0.00233535	Isoform0005907;Isoform0021782;Isoform0026779;Isoform0046040;Isoform0054893
GO:0000470	maturation of LSU-rRNA	5	10	4.7273e-05	0.00233535	Isoform0005907;Isoform0021782;Isoform0026779;Isoform0046040;Isoform0054893
GO:0032508	DNA duplex unwinding	5	10	4.7273e-05	0.00233535	Isoform0018637;Isoform0018888;Isoform0025625;Isoform0033230;Isoform0048728
GO:0042273	ribosomal large subunit biogenesis	5	10	4.7273e-05	0.00233535	Isoform0005907;Isoform0021782;Isoform0026779;Isoform0046040;Isoform0054893
GO:0006417	regulation of translation	28	264	5.32274e-05	0.00233535	Isoform0000167;Isoform0013891;Isoform0018965;Isoform0024619;Isoform0026288;Isoform0026645;Isoform0027390;Isoform0030248;Isoform0031232;Isoform0036930;Isoform0037116;Isoform0037351;Isoform0040875;Isoform0040943;Isoform0043782;Isoform0043898;Isoform0044306;Isoform0045325;Isoform0046276;Isoform0046442;Isoform0047117;Isoform0047188;Isoform0047303;Isoform0047492;Isoform0059315;Isoform0059510;Isoform00…
GO:0034248	regulation of cellular amide metabolic process	28	264	5.32274e-05	0.00233535	Isoform0000167;Isoform0013891;Isoform0018965;Isoform0024619;Isoform0026288;Isoform0026645;Isoform0027390;Isoform0030248;Isoform0031232;Isoform0036930;Isoform0037116;Isoform0037351;Isoform0040875;Isoform0040943;Isoform0043782;Isoform0043898;Isoform0044306;Isoform0045325;Isoform0046276;Isoform0046442;Isoform0047117;Isoform0047188;Isoform0047303;Isoform0047492;Isoform0059315;Isoform0059510;Isoform00…
GO:0048519	negative regulation of biological process	29	283	7.34928e-05	0.00303482	Isoform0011044;Isoform0017833;Isoform0019040;Isoform0022440;Isoform0025625;Isoform0028323;Isoform0033230;Isoform0038291;Isoform0044734;Isoform0045948;Isoform0046003;Isoform0046142;Isoform0046175;Isoform0047273;Isoform0047519;Isoform0047692;Isoform0048426;Isoform0048630;Isoform0049179;Isoform0049420;Isoform0049997;Isoform0056152;Isoform0057738;Isoform0059508;Isoform0065738;Isoform0065853;Isoform00…
GO:0032776	DNA methylation on cytosine	3	3	0.000104017	0.00405667	Isoform0047454;Isoform0047473;Isoform0052453
GO:0022402	cell cycle process	22	202	0.000223449	0.00825585	Isoform0007748;Isoform0018515;Isoform0018637;Isoform0018888;Isoform0026866;Isoform0032732;Isoform0033799;Isoform0037218;Isoform0041810;Isoform0042725;Isoform0044622;Isoform0046003;Isoform0047579;Isoform0048630;Isoform0048728;Isoform0052253;Isoform0053308;Isoform0056149;Isoform0058606;Isoform0062945;Isoform0067399;Isoform0067472
GO:0016458	gene silencing	23	218	0.000259477	0.00910763	Isoform0017833;Isoform0025625;Isoform0028323;Isoform0033230;Isoform0038291;Isoform0044734;Isoform0046003;Isoform0046142;Isoform0047273;Isoform0047519;Isoform0047692;Isoform0048426;Isoform0048630;Isoform0049179;Isoform0049420;Isoform0049997;Isoform0056152;Isoform0057738;Isoform0059508;Isoform0065738;Isoform0065853;Isoform0067858;Isoform0070576
GO:0010629	negative regulation of gene expression	23	221	0.000316359	0.00971726	Isoform0017833;Isoform0025625;Isoform0028323;Isoform0033230;Isoform0038291;Isoform0044734;Isoform0046003;Isoform0046142;Isoform0047273;Isoform0047519;Isoform0047692;Isoform0048426;Isoform0048630;Isoform0049179;Isoform0049420;Isoform0049997;Isoform0056152;Isoform0057738;Isoform0059508;Isoform0065738;Isoform0065853;Isoform0067858;Isoform0070576
GO:0000819	sister chromatid segregation	7	30	0.000393363	0.00971726	Isoform0041810;Isoform0047579;Isoform0053308;Isoform0056149;Isoform0062945;Isoform0067399;Isoform0067472
GO:0007062	sister chromatid cohesion	7	30	0.000393363	0.00971726	Isoform0041810;Isoform0047579;Isoform0053308;Isoform0056149;Isoform0062945;Isoform0067399;Isoform0067472
GO:0098813	nuclear chromosome segregation	7	30	0.000393363	0.00971726	Isoform0041810;Isoform0047579;Isoform0053308;Isoform0056149;Isoform0062945;Isoform0067399;Isoform0067472
GO:0006306	DNA methylation	3	4	0.000401425	0.00971726	Isoform0047454;Isoform0047473;Isoform0052453
GO:0009113	purine nucleobase biosynthetic process	3	4	0.000401425	0.00971726	Isoform0055512;Isoform0063778;Isoform0072520
GO:0043096	purine nucleobase salvage	3	4	0.000401425	0.00971726	Isoform0055512;Isoform0063778;Isoform0072520
GO:0043101	purine-containing compound salvage	3	4	0.000401425	0.00971726	Isoform0055512;Isoform0063778;Isoform0072520
GO:0044728	DNA methylation or demethylation	3	4	0.000401425	0.00971726	Isoform0047454;Isoform0047473;Isoform0052453
GO:0010608	posttranscriptional regulation of gene expression	32	360	0.000444394	0.0103988	Isoform0000167;Isoform0013891;Isoform0018965;Isoform0024619;Isoform0026288;Isoform0026645;Isoform0027390;Isoform0030248;Isoform0031232;Isoform0036930;Isoform0037116;Isoform0037351;Isoform0040875;Isoform0040943;Isoform0043782;Isoform0043898;Isoform0044306;Isoform0044734;Isoform0045325;Isoform0046276;Isoform0046442;Isoform0047117;Isoform0047188;Isoform0047303;Isoform0047492;Isoform0049420;Isoform00…
GO:0010605	negative regulation of macromolecule metabolic process	23	230	0.000557859	0.0126328	Isoform0017833;Isoform0025625;Isoform0028323;Isoform0033230;Isoform0038291;Isoform0044734;Isoform0046003;Isoform0046142;Isoform0047273;Isoform0047519;Isoform0047692;Isoform0048426;Isoform0048630;Isoform0049179;Isoform0049420;Isoform0049997;Isoform0056152;Isoform0057738;Isoform0059508;Isoform0065738;Isoform0065853;Isoform0067858;Isoform0070576
GO:0006305	DNA alkylation	12	87	0.000754351	0.0165486	Isoform0018637;Isoform0018888;Isoform0025625;Isoform0033230;Isoform0046003;Isoform0047454;Isoform0047473;Isoform0047692;Isoform0048728;Isoform0052453;Isoform0057738;Isoform0067858
GO:0006364	rRNA processing	5	17	0.000880858	0.0187382	Isoform0005907;Isoform0021782;Isoform0026779;Isoform0046040;Isoform0054893
GO:0006304	DNA modification	12	90	0.00102435	0.0211497	Isoform0018637;Isoform0018888;Isoform0025625;Isoform0033230;Isoform0046003;Isoform0047454;Isoform0047473;Isoform0047692;Isoform0048728;Isoform0052453;Isoform0057738;Isoform0067858
GO:0045229	external encapsulating structure organization	34	411	0.00106969	0.021455	Isoform0001130;Isoform0002698;Isoform0004984;Isoform0005358;Isoform0005385;Isoform0005562;Isoform0005928;Isoform0009500;Isoform0009684;Isoform0009706;Isoform0009989;Isoform0010665;Isoform0011044;Isoform0011745;Isoform0012028;Isoform0012465;Isoform0013744;Isoform0016223;Isoform0016299;Isoform0016714;Isoform0016787;Isoform0016893;Isoform0016980;Isoform0019404;Isoform0022440;Isoform0024440;Isoform00…
GO:0032268	regulation of cellular protein metabolic process	28	318	0.00113729	0.0215778	Isoform0000167;Isoform0013891;Isoform0018965;Isoform0024619;Isoform0026288;Isoform0026645;Isoform0027390;Isoform0030248;Isoform0031232;Isoform0036930;Isoform0037116;Isoform0037351;Isoform0040875;Isoform0040943;Isoform0043782;Isoform0043898;Isoform0044306;Isoform0045325;Isoform0046276;Isoform0046442;Isoform0047117;Isoform0047188;Isoform0047303;Isoform0047492;Isoform0059315;Isoform0059510;Isoform00…
GO:0051246	regulation of protein metabolic process	28	318	0.00113729	0.0215778	Isoform0000167;Isoform0013891;Isoform0018965;Isoform0024619;Isoform0026288;Isoform0026645;Isoform0027390;Isoform0030248;Isoform0031232;Isoform0036930;Isoform0037116;Isoform0037351;Isoform0040875;Isoform0040943;Isoform0043782;Isoform0043898;Isoform0044306;Isoform0045325;Isoform0046276;Isoform0046442;Isoform0047117;Isoform0047188;Isoform0047303;Isoform0047492;Isoform0059315;Isoform0059510;Isoform00…
GO:0042254	ribosome biogenesis	5	18	0.00117273	0.0216646	Isoform0005907;Isoform0021782;Isoform0026779;Isoform0046040;Isoform0054893
GO:0006241	CTP biosynthetic process	7	37	0.00149337	0.0262087	Isoform0019470;Isoform0020833;Isoform0024087;Isoform0024888;Isoform0025453;Isoform0033689;Isoform0036653
GO:0046036	CTP metabolic process	7	37	0.00149337	0.0262087	Isoform0019470;Isoform0020833;Isoform0024087;Isoform0024888;Isoform0025453;Isoform0033689;Isoform0036653
GO:0009147	pyrimidine nucleoside triphosphate metabolic process	7	38	0.00175734	0.0280376	Isoform0019470;Isoform0020833;Isoform0024087;Isoform0024888;Isoform0025453;Isoform0033689;Isoform0036653
GO:0009148	pyrimidine nucleoside triphosphate biosynthetic process	7	38	0.00175734	0.0280376	Isoform0019470;Isoform0020833;Isoform0024087;Isoform0024888;Isoform0025453;Isoform0033689;Isoform0036653
GO:0009208	pyrimidine ribonucleoside triphosphate metabolic process	7	38	0.00175734	0.0280376	Isoform0019470;Isoform0020833;Isoform0024087;Isoform0024888;Isoform0025453;Isoform0033689;Isoform0036653
GO:0009209	pyrimidine ribonucleoside triphosphate biosynthetic process	7	38	0.00175734	0.0280376	Isoform0019470;Isoform0020833;Isoform0024087;Isoform0024888;Isoform0025453;Isoform0033689;Isoform0036653
GO:0018131	oxazole or thiazole biosynthetic process	2	2	0.0022142	0.0330717	Isoform0002023;Isoform0011083
GO:0035337	fatty-acyl-CoA metabolic process	2	2	0.0022142	0.0330717	Isoform0005003;Isoform0014778
GO:0046484	oxazole or thiazole metabolic process	2	2	0.0022142	0.0330717	Isoform0002023;Isoform0011083
GO:0006643	membrane lipid metabolic process	8	52	0.00279304	0.0408482	Isoform0025611;Isoform0025976;Isoform0035295;Isoform0046792;Isoform0048819;Isoform0054611;Isoform0059495;Isoform0060070
GO:0042440	pigment metabolic process	3	7	0.00315618	0.0423202	Isoform0055512;Isoform0063778;Isoform0072520
GO:0046148	pigment biosynthetic process	3	7	0.00315618	0.0423202	Isoform0055512;Isoform0063778;Isoform0072520
GO:0051301	cell division	8	53	0.00315664	0.0423202	Isoform0018637;Isoform0018888;Isoform0019040;Isoform0037218;Isoform0042935;Isoform0048630;Isoform0048728;Isoform0058606
GO:0018022	peptidyl-lysine methylation	10	77	0.00319511	0.0423202	Isoform0018637;Isoform0018888;Isoform0025625;Isoform0033230;Isoform0046003;Isoform0047692;Isoform0048630;Isoform0048728;Isoform0057738;Isoform0067858
GO:0034968	histone lysine methylation	10	77	0.00319511	0.0423202	Isoform0018637;Isoform0018888;Isoform0025625;Isoform0033230;Isoform0046003;Isoform0047692;Isoform0048630;Isoform0048728;Isoform0057738;Isoform0067858
GO:0051171	regulation of nitrogen compound metabolic process	49	702	0.003876	0.0497043	Isoform0000167;Isoform0001909;Isoform0003230;Isoform0013891;Isoform0018637;Isoform0018888;Isoform0018965;Isoform0024619;Isoform0026288;Isoform0026645;Isoform0027390;Isoform0030248;Isoform0031232;Isoform0036930;Isoform0037116;Isoform0037351;Isoform0040875;Isoform0040943;Isoform0043782;Isoform0043898;Isoform0044306;Isoform0044734;Isoform0045325;Isoform0046003;Isoform0046276;Isoform0046442;Isoform00…
GO:0006066	alcohol metabolic process	16	161	0.00389421	0.0497043	Isoform0000890;Isoform0003958;Isoform0004280;Isoform0006869;Isoform0010365;Isoform0016167;Isoform0019694;Isoform0022243;Isoform0029477;Isoform0031457;Isoform0033596;Isoform0037447;Isoform0037849;Isoform0039682;Isoform0042933;Isoform0054118
GO:0051276	chromosome organization	39	536	0.00480871	0.0600256	Isoform0000062;Isoform0018515;Isoform0018637;Isoform0018888;Isoform0020090;Isoform0020933;Isoform0022794;Isoform0025625;Isoform0026309;Isoform0029037;Isoform0029167;Isoform0029346;Isoform0031169;Isoform0033230;Isoform0041810;Isoform0044734;Isoform0045786;Isoform0046003;Isoform0046498;Isoform0047454;Isoform0047473;Isoform0047579;Isoform0047692;Isoform0048630;Isoform0048728;Isoform0052453;Isoform00…
GO:0015669	gas transport	3	8	0.00487388	0.0600256	Isoform0001294;Isoform0028326;Isoform0038628
GO:0051052	regulation of DNA metabolic process	8	57	0.00499134	0.0604125	Isoform0018637;Isoform0018888;Isoform0046003;Isoform0048728;Isoform0059616;Isoform0062699;Isoform0064597;Isoform0069043
GO:0006672	ceramide metabolic process	2	3	0.00643457	0.0728559	Isoform0035295;Isoform0046792
GO:0006677	glycosylceramide metabolic process	2	3	0.00643457	0.0728559	Isoform0035295;Isoform0046792
GO:0006678	glucosylceramide metabolic process	2	3	0.00643457	0.0728559	Isoform0035295;Isoform0046792
GO:0006687	glycosphingolipid metabolic process	2	3	0.00643457	0.0728559	Isoform0035295;Isoform0046792
GO:0009692	ethylene metabolic process	3	9	0.00705664	0.0762117	Isoform0006348;Isoform0009604;Isoform0013696
GO:0043449	cellular alkene metabolic process	3	9	0.00705664	0.0762117	Isoform0006348;Isoform0009604;Isoform0013696
GO:1900673	olefin metabolic process	3	9	0.00705664	0.0762117	Isoform0006348;Isoform0009604;Isoform0013696
GO:0019222	regulation of metabolic process	138	2417	0.00839218	0.0856864	Isoform0000167;Isoform0001307;Isoform0001909;Isoform0002371;Isoform0002438;Isoform0003230;Isoform0003250;Isoform0003319;Isoform0003391;Isoform0005631;Isoform0006376;Isoform0007040;Isoform0007225;Isoform0007476;Isoform0007811;Isoform0008029;Isoform0010713;Isoform0011044;Isoform0012289;Isoform0012416;Isoform0013041;Isoform0013055;Isoform0013574;Isoform0013891;Isoform0015932;Isoform0016585;Isoform00…
GO:0009218	pyrimidine ribonucleotide metabolic process	7	50	0.00854423	0.0856864	Isoform0019470;Isoform0020833;Isoform0024087;Isoform0024888;Isoform0025453;Isoform0033689;Isoform0036653
GO:0009220	pyrimidine ribonucleotide biosynthetic process	7	50	0.00854423	0.0856864	Isoform0019470;Isoform0020833;Isoform0024087;Isoform0024888;Isoform0025453;Isoform0033689;Isoform0036653
GO:0046132	pyrimidine ribonucleoside biosynthetic process	7	50	0.00854423	0.0856864	Isoform0019470;Isoform0020833;Isoform0024087;Isoform0024888;Isoform0025453;Isoform0033689;Isoform0036653
GO:0046134	pyrimidine nucleoside biosynthetic process	7	50	0.00854423	0.0856864	Isoform0019470;Isoform0020833;Isoform0024087;Isoform0024888;Isoform0025453;Isoform0033689;Isoform0036653
GO:0006144	purine nucleobase metabolic process	3	10	0.00973132	0.0962167	Isoform0055512;Isoform0063778;Isoform0072520
GO:0043087	regulation of GTPase activity	13	138	0.0133735	0.130391	Isoform0019737;Isoform0021871;Isoform0024737;Isoform0030318;Isoform0032719;Isoform0039467;Isoform0040666;Isoform0060946;Isoform0068967;Isoform0070918;Isoform0070935;Isoform0070985;Isoform0071096
GO:1901615	organic hydroxy compound metabolic process	19	232	0.0137745	0.131488	Isoform0000890;Isoform0002238;Isoform0003958;Isoform0004280;Isoform0006869;Isoform0007492;Isoform0010365;Isoform0016167;Isoform0019694;Isoform0022243;Isoform0029477;Isoform0031457;Isoform0033596;Isoform0037218;Isoform0037447;Isoform0037849;Isoform0039682;Isoform0042933;Isoform0054118
GO:0007059	chromosome segregation	10	95	0.0138606	0.131488	Isoform0041810;Isoform0046003;Isoform0047579;Isoform0049420;Isoform0053308;Isoform0056149;Isoform0062945;Isoform0065738;Isoform0067399;Isoform0067472
GO:0080090	regulation of primary metabolic process	49	757	0.0150403	0.140777	Isoform0000167;Isoform0001909;Isoform0003230;Isoform0013891;Isoform0018637;Isoform0018888;Isoform0018965;Isoform0024619;Isoform0026288;Isoform0026645;Isoform0027390;Isoform0030248;Isoform0031232;Isoform0036930;Isoform0037116;Isoform0037351;Isoform0040875;Isoform0040943;Isoform0043782;Isoform0043898;Isoform0044306;Isoform0044734;Isoform0045325;Isoform0046003;Isoform0046276;Isoform0046442;Isoform00…
GO:0006275	regulation of DNA replication	3	12	0.0166294	0.149721	Isoform0062699;Isoform0064597;Isoform0069043
GO:0090329	regulation of DNA-dependent DNA replication	3	12	0.0166294	0.149721	Isoform0062699;Isoform0064597;Isoform0069043
GO:2000112	regulation of cellular macromolecule biosynthetic process	43	653	0.0168018	0.149721	Isoform0000167;Isoform0001909;Isoform0003230;Isoform0013891;Isoform0018965;Isoform0024619;Isoform0026288;Isoform0026645;Isoform0027390;Isoform0030248;Isoform0031232;Isoform0036930;Isoform0037116;Isoform0037351;Isoform0040875;Isoform0040943;Isoform0043782;Isoform0043898;Isoform0044306;Isoform0044734;Isoform0045325;Isoform0046276;Isoform0046442;Isoform0047117;Isoform0047188;Isoform0047303;Isoform00…
GO:0006213	pyrimidine nucleoside metabolic process	7	57	0.0170623	0.149721	Isoform0019470;Isoform0020833;Isoform0024087;Isoform0024888;Isoform0025453;Isoform0033689;Isoform0036653
GO:0046131	pyrimidine ribonucleoside metabolic process	7	57	0.0170623	0.149721	Isoform0019470;Isoform0020833;Isoform0024087;Isoform0024888;Isoform0025453;Isoform0033689;Isoform0036653
GO:0000910	cytokinesis	6	45	0.0182	0.156512	Isoform0018637;Isoform0018888;Isoform0037218;Isoform0048630;Isoform0048728;Isoform0058606
GO:0031323	regulation of cellular metabolic process	49	766	0.018282	0.156512	Isoform0000167;Isoform0001909;Isoform0003230;Isoform0013891;Isoform0018637;Isoform0018888;Isoform0018965;Isoform0024619;Isoform0026288;Isoform0026645;Isoform0027390;Isoform0030248;Isoform0031232;Isoform0036930;Isoform0037116;Isoform0037351;Isoform0040875;Isoform0040943;Isoform0043782;Isoform0043898;Isoform0044306;Isoform0044734;Isoform0045325;Isoform0046003;Isoform0046276;Isoform0046442;Isoform00…
GO:0065009	regulation of molecular function	15	176	0.0193447	0.163614	Isoform0019737;Isoform0021871;Isoform0024737;Isoform0030318;Isoform0032719;Isoform0039467;Isoform0040666;Isoform0047692;Isoform0057738;Isoform0060946;Isoform0068967;Isoform0070918;Isoform0070935;Isoform0070985;Isoform0071096
GO:0060255	regulation of macromolecule metabolic process	118	2091	0.0201483	0.166805	Isoform0000167;Isoform0001307;Isoform0001909;Isoform0002371;Isoform0002438;Isoform0003230;Isoform0003250;Isoform0003319;Isoform0003391;Isoform0005631;Isoform0006376;Isoform0007040;Isoform0007225;Isoform0007476;Isoform0007811;Isoform0008029;Isoform0010713;Isoform0012289;Isoform0012416;Isoform0013041;Isoform0013055;Isoform0013574;Isoform0013891;Isoform0015932;Isoform0016585;Isoform0017598;Isoform00…
GO:0010556	regulation of macromolecule biosynthetic process	43	661	0.0201972	0.166805	Isoform0000167;Isoform0001909;Isoform0003230;Isoform0013891;Isoform0018965;Isoform0024619;Isoform0026288;Isoform0026645;Isoform0027390;Isoform0030248;Isoform0031232;Isoform0036930;Isoform0037116;Isoform0037351;Isoform0040875;Isoform0040943;Isoform0043782;Isoform0043898;Isoform0044306;Isoform0044734;Isoform0045325;Isoform0046276;Isoform0046442;Isoform0047117;Isoform0047188;Isoform0047303;Isoform00…
GO:0051336	regulation of hydrolase activity	13	146	0.0204869	0.16723	Isoform0019737;Isoform0021871;Isoform0024737;Isoform0030318;Isoform0032719;Isoform0039467;Isoform0040666;Isoform0060946;Isoform0068967;Isoform0070918;Isoform0070935;Isoform0070985;Isoform0071096
GO:0018205	peptidyl-lysine modification	10	103	0.0232165	0.187333	Isoform0018637;Isoform0018888;Isoform0025625;Isoform0033230;Isoform0046003;Isoform0047692;Isoform0048630;Isoform0048728;Isoform0057738;Isoform0067858
GO:0031326	regulation of cellular biosynthetic process	43	672	0.0257415	0.205347	Isoform0000167;Isoform0001909;Isoform0003230;Isoform0013891;Isoform0018965;Isoform0024619;Isoform0026288;Isoform0026645;Isoform0027390;Isoform0030248;Isoform0031232;Isoform0036930;Isoform0037116;Isoform0037351;Isoform0040875;Isoform0040943;Isoform0043782;Isoform0043898;Isoform0044306;Isoform0044734;Isoform0045325;Isoform0046276;Isoform0046442;Isoform0047117;Isoform0047188;Isoform0047303;Isoform00…
GO:0009889	regulation of biosynthetic process	43	673	0.0262999	0.207444	Isoform0000167;Isoform0001909;Isoform0003230;Isoform0013891;Isoform0018965;Isoform0024619;Isoform0026288;Isoform0026645;Isoform0027390;Isoform0030248;Isoform0031232;Isoform0036930;Isoform0037116;Isoform0037351;Isoform0040875;Isoform0040943;Isoform0043782;Isoform0043898;Isoform0044306;Isoform0044734;Isoform0045325;Isoform0046276;Isoform0046442;Isoform0047117;Isoform0047188;Isoform0047303;Isoform00…
GO:0044238	primary metabolic process	468	9349	0.0281998	0.219958	Isoform0000488;Isoform0000670;Isoform0000695;Isoform0000970;Isoform0001130;Isoform0001203;Isoform0001296;Isoform0001433;Isoform0001451;Isoform0001511;Isoform0001549;Isoform0002058;Isoform0002258;Isoform0002276;Isoform0002394;Isoform0002443;Isoform0002591;Isoform0002603;Isoform0002639;Isoform0002698;Isoform0002723;Isoform0002907;Isoform0002908;Isoform0003162;Isoform0003229;Isoform0003271;Isoform00…
GO:0032958	inositol phosphate biosynthetic process	3	16	0.0368174	0.280933	Isoform0000890;Isoform0031457;Isoform0054118
GO:0046173	polyol biosynthetic process	3	16	0.0368174	0.280933	Isoform0000890;Isoform0031457;Isoform0054118
GO:0018193	peptidyl-amino acid modification	10	112	0.0384151	0.289972	Isoform0018637;Isoform0018888;Isoform0025625;Isoform0033230;Isoform0046003;Isoform0047692;Isoform0048630;Isoform0048728;Isoform0057738;Isoform0067858
GO:0006772	thiamine metabolic process	2	7	0.0397107	0.296563	Isoform0002023;Isoform0011083
GO:0006278	RNA-dependent DNA replication	1	1	0.0470813	0.347319	Isoform0050446
GO:0010468	regulation of gene expression	111	2024	0.0474966	0.347319	Isoform0000167;Isoform0001307;Isoform0001909;Isoform0002371;Isoform0002438;Isoform0003230;Isoform0003250;Isoform0003319;Isoform0003391;Isoform0005631;Isoform0006376;Isoform0007040;Isoform0007225;Isoform0007476;Isoform0007811;Isoform0008029;Isoform0010713;Isoform0012289;Isoform0012416;Isoform0013041;Isoform0013055;Isoform0013574;Isoform0013891;Isoform0015932;Isoform0016585;Isoform0017598;Isoform00…
GO:0050790	regulation of catalytic activity	13	166	0.0501528	0.356511	Isoform0019737;Isoform0021871;Isoform0024737;Isoform0030318;Isoform0032719;Isoform0039467;Isoform0040666;Isoform0060946;Isoform0068967;Isoform0070918;Isoform0070935;Isoform0070985;Isoform0071096
GO:0032506	cytokinetic process	5	43	0.0502772	0.356511	Isoform0018637;Isoform0018888;Isoform0037218;Isoform0048630;Isoform0048728
GO:0061640	cytoskeleton-dependent cytokinesis	5	43	0.0502772	0.356511	Isoform0018637;Isoform0018888;Isoform0048630;Isoform0048728;Isoform0058606
GO:0007215	glutamate receptor signaling pathway	2	8	0.0513229	0.360287	Isoform0050379;Isoform0052584
GO:0008213	protein alkylation	13	172	0.0629998	0.435993	Isoform0004650;Isoform0018637;Isoform0018888;Isoform0019190;Isoform0022551;Isoform0025625;Isoform0033230;Isoform0046003;Isoform0047692;Isoform0048630;Isoform0048728;Isoform0057738;Isoform0067858
GO:0000272	polysaccharide catabolic process	2	9	0.0639704	0.435993	Isoform0022440;Isoform0045786
GO:0016052	carbohydrate catabolic process	2	9	0.0639704	0.435993	Isoform0022440;Isoform0045786
GO:0046112	nucleobase biosynthetic process	3	20	0.0652901	0.440708	Isoform0055512;Isoform0063778;Isoform0072520
GO:0070085	glycosylation	10	125	0.0707019	0.472693	Isoform0001451;Isoform0010634;Isoform0015998;Isoform0019488;Isoform0020883;Isoform0031366;Isoform0039357;Isoform0046245;Isoform0046638;Isoform0062026
GO:0043647	inositol phosphate metabolic process	3	21	0.073607	0.485711	Isoform0000890;Isoform0031457;Isoform0054118
GO:0006529	asparagine biosynthetic process	4	34	0.0740329	0.485711	Isoform0017647;Isoform0020709;Isoform0023257;Isoform0030783
GO:0006720	isoprenoid metabolic process	14	195	0.0772329	0.490326	Isoform0003958;Isoform0004280;Isoform0005139;Isoform0009110;Isoform0019694;Isoform0022243;Isoform0025025;Isoform0025604;Isoform0029477;Isoform0033596;Isoform0034931;Isoform0037447;Isoform0037849;Isoform0045464
GO:0010075	regulation of meristem growth	2	10	0.0775302	0.490326	Isoform0018637;Isoform0048728
GO:0040030	regulation of molecular function, epigenetic	2	10	0.0775302	0.490326	Isoform0047692;Isoform0057738
GO:0048638	regulation of developmental growth	2	10	0.0775302	0.490326	Isoform0018637;Isoform0048728
GO:0034470	ncRNA processing	5	51	0.0908429	0.566208	Isoform0005907;Isoform0021782;Isoform0026779;Isoform0046040;Isoform0054893
GO:0015840	urea transport	1	2	0.0919484	0.566208	Isoform0016176
GO:0090529	cell septum assembly	1	2	0.0919484	0.566208	Isoform0037218
GO:0044042	glucan metabolic process	39	666	0.0943959	0.576226	Isoform0001433;Isoform0004984;Isoform0005358;Isoform0005385;Isoform0005562;Isoform0005910;Isoform0005928;Isoform0006899;Isoform0009500;Isoform0009684;Isoform0009706;Isoform0009989;Isoform0010665;Isoform0011745;Isoform0012028;Isoform0012465;Isoform0013744;Isoform0016223;Isoform0016299;Isoform0016714;Isoform0016787;Isoform0016893;Isoform0016980;Isoform0020046;Isoform0025611;Isoform0026500;Isoform00…
GO:0005977	glycogen metabolic process	3	24	0.101138	0.606827	Isoform0020046;Isoform0043356;Isoform0057253
GO:0006112	energy reserve metabolic process	3	24	0.101138	0.606827	Isoform0020046;Isoform0043356;Isoform0057253
GO:0048511	rhythmic process	4	38	0.102025	0.606963	Isoform0005900;Isoform0044784;Isoform0065467;Isoform0069431
GO:0010073	meristem maintenance	2	12	0.10694	0.630858	Isoform0018637;Isoform0048728
GO:0006664	glycolipid metabolic process	3	25	0.111104	0.644588	Isoform0025611;Isoform0035295;Isoform0046792
GO:1903509	liposaccharide metabolic process	3	25	0.111104	0.644588	Isoform0025611;Isoform0035295;Isoform0046792
GO:0005982	starch metabolic process	10	140	0.124568	0.716779	Isoform0020046;Isoform0025611;Isoform0026500;Isoform0028408;Isoform0043356;Isoform0044560;Isoform0044784;Isoform0045627;Isoform0057253;Isoform0069431
GO:1902410	mitotic cytokinetic process	4	41	0.125742	0.717649	Isoform0018637;Isoform0018888;Isoform0048630;Isoform0048728
GO:0000281	mitotic cytokinesis	4	42	0.134121	0.750501	Isoform0018637;Isoform0018888;Isoform0048630;Isoform0048728
GO:0019566	arabinose metabolic process	1	3	0.134705	0.750501	Isoform0055395
GO:0019682	glyceraldehyde-3-phosphate metabolic process	1	3	0.134705	0.750501	Isoform0031746
GO:0042723	thiamine-containing compound metabolic process	2	14	0.138744	0.766917	Isoform0002023;Isoform0011083
GO:0006637	acyl-CoA metabolic process	4	44	0.15153	0.824604	Isoform0005003;Isoform0014778;Isoform0018637;Isoform0048728
GO:0035383	thioester metabolic process	4	44	0.15153	0.824604	Isoform0005003;Isoform0014778;Isoform0018637;Isoform0048728
GO:0005976	polysaccharide metabolic process	42	761	0.160449	0.866425	Isoform0001433;Isoform0001549;Isoform0004984;Isoform0005358;Isoform0005385;Isoform0005562;Isoform0005910;Isoform0005928;Isoform0006899;Isoform0009500;Isoform0009684;Isoform0009706;Isoform0009989;Isoform0010665;Isoform0011745;Isoform0012028;Isoform0012465;Isoform0013744;Isoform0016223;Isoform0016299;Isoform0016714;Isoform0016787;Isoform0016893;Isoform0016980;Isoform0020046;Isoform0022440;Isoform00…
GO:0043414	macromolecule methylation	13	206	0.174621	0.919154	Isoform0018637;Isoform0018888;Isoform0025625;Isoform0033230;Isoform0046003;Isoform0047454;Isoform0047473;Isoform0047692;Isoform0048630;Isoform0048728;Isoform0052453;Isoform0057738;Isoform0067858
GO:0010119	regulation of stomatal movement	1	4	0.175451	0.919154	Isoform0041184
GO:0019336	phenol-containing compound catabolic process	1	4	0.175451	0.919154	Isoform0007492
GO:1901616	organic hydroxy compound catabolic process	1	4	0.175451	0.919154	Isoform0007492
GO:0006470	protein dephosphorylation	3	31	0.177611	0.923576	Isoform0028162;Isoform0047596;Isoform0051995
GO:0046165	alcohol biosynthetic process	5	64	0.182555	0.942305	Isoform0000890;Isoform0006869;Isoform0010365;Isoform0031457;Isoform0054118
GO:0032259	methylation	13	209	0.187525	0.960895	Isoform0018637;Isoform0018888;Isoform0025625;Isoform0033230;Isoform0046003;Isoform0047454;Isoform0047473;Isoform0047692;Isoform0048630;Isoform0048728;Isoform0052453;Isoform0057738;Isoform0067858
GO:0016311	dephosphorylation	3	32	0.189599	0.964483	Isoform0028162;Isoform0047596;Isoform0051995
GO:0006629	lipid metabolic process	54	1017	0.194456	0.982075	Isoform0000488;Isoform0000670;Isoform0001203;Isoform0002908;Isoform0003229;Isoform0003958;Isoform0004280;Isoform0005003;Isoform0005139;Isoform0005557;Isoform0005729;Isoform0005771;Isoform0007492;Isoform0009110;Isoform0010885;Isoform0011395;Isoform0014778;Isoform0016167;Isoform0019694;Isoform0021347;Isoform0022243;Isoform0022686;Isoform0023585;Isoform0025025;Isoform0025604;Isoform0025611;Isoform00…
GO:0016571	histone methylation	10	156	0.200804	1	Isoform0018637;Isoform0018888;Isoform0025625;Isoform0033230;Isoform0046003;Isoform0047692;Isoform0048630;Isoform0048728;Isoform0057738;Isoform0067858
GO:0008202	steroid metabolic process	6	84	0.203488	1	Isoform0000488;Isoform0000670;Isoform0002908;Isoform0003229;Isoform0010885;Isoform0042933
GO:0006479	protein methylation	10	157	0.206133	1	Isoform0018637;Isoform0018888;Isoform0025625;Isoform0033230;Isoform0046003;Isoform0047692;Isoform0048630;Isoform0048728;Isoform0057738;Isoform0067858
GO:0006665	sphingolipid metabolic process	2	18	0.206889	1	Isoform0035295;Isoform0046792
GO:1901617	organic hydroxy compound biosynthetic process	5	68	0.215865	1	Isoform0000890;Isoform0006869;Isoform0010365;Isoform0031457;Isoform0054118
GO:0008152	metabolic process	644	13462	0.22276	1	Isoform0000488;Isoform0000670;Isoform0000695;Isoform0000787;Isoform0000804;Isoform0000890;Isoform0000923;Isoform0000970;Isoform0001130;Isoform0001179;Isoform0001203;Isoform0001271;Isoform0001296;Isoform0001301;Isoform0001355;Isoform0001433;Isoform0001451;Isoform0001511;Isoform0001549;Isoform0001836;Isoform0002023;Isoform0002058;Isoform0002092;Isoform0002238;Isoform0002258;Isoform0002276;Isoform00…
GO:0034220	ion transmembrane transport	14	236	0.223544	1	Isoform0007684;Isoform0023796;Isoform0024388;Isoform0035461;Isoform0045585;Isoform0046255;Isoform0046433;Isoform0047138;Isoform0054727;Isoform0058818;Isoform0062258;Isoform0062510;Isoform0065674;Isoform0070102
GO:0006338	chromatin remodeling	3	35	0.226668	1	Isoform0029037;Isoform0070815;Isoform0071373
GO:0010160	formation of organ boundary	3	35	0.226668	1	Isoform0029037;Isoform0070815;Isoform0071373
GO:0048645	organ formation	3	35	0.226668	1	Isoform0029037;Isoform0070815;Isoform0071373
GO:0048859	formation of anatomical boundary	3	35	0.226668	1	Isoform0029037;Isoform0070815;Isoform0071373
GO:1903047	mitotic cell cycle process	4	52	0.228337	1	Isoform0018637;Isoform0018888;Isoform0048630;Isoform0048728
GO:0071555	cell wall organization	5	70	0.233189	1	Isoform0011044;Isoform0022440;Isoform0045786;Isoform0045948;Isoform0046175
GO:0008283	cell proliferation	3	36	0.239321	1	Isoform0018637;Isoform0048728;Isoform0062997
GO:0009112	nucleobase metabolic process	4	55	0.259332	1	Isoform0033417;Isoform0055512;Isoform0063778;Isoform0072520
GO:0015980	energy derivation by oxidation of organic compounds	5	73	0.25986	1	Isoform0020046;Isoform0043356;Isoform0049160;Isoform0057011;Isoform0057253
GO:0071840	cellular component organization or biogenesis	103	2058	0.265254	1	Isoform0000062;Isoform0001130;Isoform0002481;Isoform0002698;Isoform0003300;Isoform0003564;Isoform0004632;Isoform0004984;Isoform0005358;Isoform0005385;Isoform0005562;Isoform0005907;Isoform0005928;Isoform0007492;Isoform0008722;Isoform0009500;Isoform0009599;Isoform0009684;Isoform0009706;Isoform0009989;Isoform0010024;Isoform0010665;Isoform0011044;Isoform0011577;Isoform0011745;Isoform0012028;Isoform00…
GO:0055085	transmembrane transport	14	246	0.270671	1	Isoform0007684;Isoform0023796;Isoform0024388;Isoform0035461;Isoform0045585;Isoform0046255;Isoform0046433;Isoform0047138;Isoform0054727;Isoform0058818;Isoform0062258;Isoform0062510;Isoform0065674;Isoform0070102
GO:0006457	protein folding	2	22	0.277654	1	Isoform0020549;Isoform0037190
GO:0044255	cellular lipid metabolic process	47	912	0.278984	1	Isoform0003958;Isoform0004280;Isoform0005003;Isoform0005139;Isoform0005557;Isoform0005729;Isoform0005771;Isoform0007492;Isoform0009110;Isoform0014778;Isoform0016167;Isoform0019694;Isoform0021347;Isoform0022243;Isoform0022686;Isoform0023585;Isoform0025025;Isoform0025604;Isoform0025611;Isoform0025976;Isoform0028386;Isoform0029477;Isoform0030957;Isoform0033417;Isoform0033596;Isoform0034931;Isoform00…
GO:0009067	aspartate family amino acid biosynthetic process	4	57	0.280429	1	Isoform0017647;Isoform0020709;Isoform0023257;Isoform0030783
GO:0030865	cortical cytoskeleton organization	1	7	0.286545	1	Isoform0033826
GO:0009199	ribonucleoside triphosphate metabolic process	7	114	0.290485	1	Isoform0019470;Isoform0020833;Isoform0024087;Isoform0024888;Isoform0025453;Isoform0033689;Isoform0036653
GO:0009201	ribonucleoside triphosphate biosynthetic process	7	114	0.290485	1	Isoform0019470;Isoform0020833;Isoform0024087;Isoform0024888;Isoform0025453;Isoform0033689;Isoform0036653
GO:0009746	response to hexose	3	40	0.290886	1	Isoform0005003;Isoform0007492;Isoform0014778
GO:0034284	response to monosaccharide	3	40	0.290886	1	Isoform0005003;Isoform0007492;Isoform0014778
GO:0009141	nucleoside triphosphate metabolic process	7	115	0.297985	1	Isoform0019470;Isoform0020833;Isoform0024087;Isoform0024888;Isoform0025453;Isoform0033689;Isoform0036653
GO:0009142	nucleoside triphosphate biosynthetic process	7	115	0.297985	1	Isoform0019470;Isoform0020833;Isoform0024087;Isoform0024888;Isoform0025453;Isoform0033689;Isoform0036653
GO:0006528	asparagine metabolic process	4	59	0.301777	1	Isoform0017647;Isoform0020709;Isoform0023257;Isoform0030783
GO:0016043	cellular component organization	97	1954	0.301975	1	Isoform0000062;Isoform0001130;Isoform0002481;Isoform0002698;Isoform0003300;Isoform0003564;Isoform0004632;Isoform0004984;Isoform0005358;Isoform0005385;Isoform0005562;Isoform0005928;Isoform0007492;Isoform0008722;Isoform0009500;Isoform0009599;Isoform0009684;Isoform0009706;Isoform0009989;Isoform0010024;Isoform0010665;Isoform0011044;Isoform0011577;Isoform0011745;Isoform0012028;Isoform0012405;Isoform00…
GO:0019725	cellular homeostasis	7	117	0.313105	1	Isoform0002606;Isoform0003681;Isoform0005787;Isoform0034090;Isoform0037328;Isoform0040420;Isoform0046662
GO:0040029	regulation of gene expression, epigenetic	7	117	0.313105	1	Isoform0044734;Isoform0047692;Isoform0049420;Isoform0057738;Isoform0059508;Isoform0065738;Isoform0067858
GO:0019751	polyol metabolic process	5	79	0.315028	1	Isoform0000890;Isoform0016167;Isoform0031457;Isoform0039682;Isoform0054118
GO:0006570	tyrosine metabolic process	1	8	0.320149	1	Isoform0007492
GO:0006814	sodium ion transport	2	25	0.330595	1	Isoform0040580;Isoform0053145
GO:0008037	cell recognition	2	25	0.330595	1	Isoform0040311;Isoform0047893
GO:0001101	response to acid chemical	12	218	0.330905	1	Isoform0000091;Isoform0000608;Isoform0002258;Isoform0005900;Isoform0014708;Isoform0019428;Isoform0027543;Isoform0029984;Isoform0030357;Isoform0041450;Isoform0065467;Isoform0066009
GO:0006325	chromatin organization	22	420	0.333526	1	Isoform0000062;Isoform0018637;Isoform0018888;Isoform0025625;Isoform0029037;Isoform0033230;Isoform0044734;Isoform0045786;Isoform0046003;Isoform0047454;Isoform0047473;Isoform0047692;Isoform0048630;Isoform0048728;Isoform0052453;Isoform0057738;Isoform0059508;Isoform0065738;Isoform0067858;Isoform0068862;Isoform0070815;Isoform0071373
GO:0048580	regulation of post-embryonic development	10	179	0.335402	1	Isoform0018637;Isoform0018888;Isoform0021975;Isoform0033826;Isoform0043120;Isoform0048728;Isoform0065467;Isoform0066004;Isoform0067574;Isoform0068862
GO:0055065	metal ion homeostasis	3	44	0.343119	1	Isoform0005787;Isoform0040580;Isoform0053145
GO:0000278	mitotic cell cycle	4	63	0.344917	1	Isoform0018637;Isoform0018888;Isoform0048630;Isoform0048728
GO:1901987	regulation of cell cycle phase transition	1	9	0.352171	1	Isoform0018888
GO:1901990	regulation of mitotic cell cycle phase transition	1	9	0.352171	1	Isoform0018888
GO:0031050	dsRNA fragmentation	6	103	0.35685	1	Isoform0044734;Isoform0049420;Isoform0049997;Isoform0056152;Isoform0059508;Isoform0067858
GO:0043331	response to dsRNA	6	103	0.35685	1	Isoform0044734;Isoform0049420;Isoform0049997;Isoform0056152;Isoform0059508;Isoform0067858
GO:0070918	production of small RNA involved in gene silencing by RNA	6	103	0.35685	1	Isoform0044734;Isoform0049420;Isoform0049997;Isoform0056152;Isoform0059508;Isoform0067858
GO:0071359	cellular response to dsRNA	6	103	0.35685	1	Isoform0044734;Isoform0049420;Isoform0049997;Isoform0056152;Isoform0059508;Isoform0067858
GO:1901699	cellular response to nitrogen compound	6	103	0.35685	1	Isoform0044734;Isoform0049420;Isoform0049997;Isoform0056152;Isoform0059508;Isoform0067858
GO:0030001	metal ion transport	19	365	0.359254	1	Isoform0005787;Isoform0007684;Isoform0023796;Isoform0024388;Isoform0034156;Isoform0035461;Isoform0040580;Isoform0045585;Isoform0046255;Isoform0046433;Isoform0047138;Isoform0053145;Isoform0054727;Isoform0058818;Isoform0062258;Isoform0062510;Isoform0065674;Isoform0065738;Isoform0070102
GO:0006979	response to oxidative stress	5	84	0.362042	1	Isoform0005787;Isoform0062699;Isoform0064597;Isoform0065467;Isoform0069043
GO:0022613	ribonucleoprotein complex biogenesis	5	85	0.371486	1	Isoform0005907;Isoform0021782;Isoform0026779;Isoform0046040;Isoform0054893
GO:0006089	lactate metabolic process	2	28	0.382397	1	Isoform0002238;Isoform0037218
GO:0019357	nicotinate nucleotide biosynthetic process	1	10	0.382686	1	Isoform0026108
GO:0046497	nicotinate nucleotide metabolic process	1	10	0.382686	1	Isoform0026108
GO:0016246	RNA interference	4	67	0.388171	1	Isoform0044734;Isoform0049420;Isoform0059508;Isoform0067858
GO:0030422	production of siRNA involved in RNA interference	4	67	0.388171	1	Isoform0044734;Isoform0049420;Isoform0059508;Isoform0067858
GO:0005975	carbohydrate metabolic process	66	1350	0.391657	1	Isoform0001433;Isoform0001451;Isoform0001549;Isoform0003793;Isoform0004984;Isoform0005358;Isoform0005385;Isoform0005562;Isoform0005910;Isoform0005928;Isoform0006899;Isoform0009500;Isoform0009684;Isoform0009706;Isoform0009989;Isoform0010634;Isoform0010665;Isoform0011745;Isoform0012028;Isoform0012309;Isoform0012465;Isoform0013744;Isoform0015998;Isoform0016167;Isoform0016223;Isoform0016299;Isoform00…
GO:0006448	regulation of translational elongation	2	29	0.399291	1	Isoform0013891;Isoform0059315
GO:0006221	pyrimidine nucleotide biosynthetic process	7	129	0.405771	1	Isoform0019470;Isoform0020833;Isoform0024087;Isoform0024888;Isoform0025453;Isoform0033689;Isoform0036653
GO:0009064	glutamine family amino acid metabolic process	7	129	0.405771	1	Isoform0019470;Isoform0020833;Isoform0024087;Isoform0024888;Isoform0025453;Isoform0033689;Isoform0036653
GO:0006260	DNA replication	5	89	0.40921	1	Isoform0005631;Isoform0018637;Isoform0046003;Isoform0048728;Isoform0050446
GO:0006721	terpenoid metabolic process	8	150	0.410758	1	Isoform0003958;Isoform0004280;Isoform0019694;Isoform0022243;Isoform0029477;Isoform0033596;Isoform0037447;Isoform0037849
GO:0006997	nucleus organization	1	11	0.411766	1	Isoform0050446
GO:0055114	oxidation-reduction process	6	110	0.416207	1	Isoform0020046;Isoform0039746;Isoform0043356;Isoform0049160;Isoform0057011;Isoform0057253
GO:0007389	pattern specification process	9	172	0.421467	1	Isoform0029037;Isoform0042935;Isoform0044734;Isoform0059508;Isoform0062997;Isoform0066004;Isoform0067574;Isoform0070815;Isoform0071373
GO:0040008	regulation of growth	2	31	0.432405	1	Isoform0018637;Isoform0048728
GO:0072527	pyrimidine-containing compound metabolic process	9	174	0.434978	1	Isoform0002023;Isoform0011083;Isoform0019470;Isoform0020833;Isoform0024087;Isoform0024888;Isoform0025453;Isoform0033689;Isoform0036653
GO:0009163	nucleoside biosynthetic process	7	133	0.43679	1	Isoform0019470;Isoform0020833;Isoform0024087;Isoform0024888;Isoform0025453;Isoform0033689;Isoform0036653
GO:0042455	ribonucleoside biosynthetic process	7	133	0.43679	1	Isoform0019470;Isoform0020833;Isoform0024087;Isoform0024888;Isoform0025453;Isoform0033689;Isoform0036653
GO:0019359	nicotinamide nucleotide biosynthetic process	1	12	0.439478	1	Isoform0026108
GO:0019363	pyridine nucleotide biosynthetic process	1	12	0.439478	1	Isoform0026108
GO:0019755	one-carbon compound transport	1	12	0.439478	1	Isoform0016176
GO:0003002	regionalization	7	134	0.444513	1	Isoform0029037;Isoform0042935;Isoform0062997;Isoform0066004;Isoform0067574;Isoform0070815;Isoform0071373
GO:0006220	pyrimidine nucleotide metabolic process	7	134	0.444513	1	Isoform0019470;Isoform0020833;Isoform0024087;Isoform0024888;Isoform0025453;Isoform0033689;Isoform0036653
GO:0031047	gene silencing by RNA	6	115	0.458264	1	Isoform0044734;Isoform0049420;Isoform0049997;Isoform0056152;Isoform0059508;Isoform0067858
GO:0065007	biological regulation	173	3644	0.464282	1	Isoform0000167;Isoform0001307;Isoform0001909;Isoform0002371;Isoform0002438;Isoform0002606;Isoform0003230;Isoform0003250;Isoform0003319;Isoform0003391;Isoform0003681;Isoform0004357;Isoform0005631;Isoform0005787;Isoform0005853;Isoform0006376;Isoform0007040;Isoform0007225;Isoform0007413;Isoform0007476;Isoform0007811;Isoform0008029;Isoform0010713;Isoform0010730;Isoform0010994;Isoform0011044;Isoform00…
GO:0055067	monovalent inorganic cation homeostasis	2	33	0.464515	1	Isoform0040580;Isoform0053145
GO:0072528	pyrimidine-containing compound biosynthetic process	7	138	0.475195	1	Isoform0019470;Isoform0020833;Isoform0024087;Isoform0024888;Isoform0025453;Isoform0033689;Isoform0036653
GO:0000280	nuclear division	3	55	0.482708	1	Isoform0003300;Isoform0018515;Isoform0046003
GO:0002252	immune effector process	1	14	0.49105	1	Isoform0049420
GO:0006875	cellular metal ion homeostasis	1	14	0.49105	1	Isoform0005787
GO:0046916	cellular transition metal ion homeostasis	1	14	0.49105	1	Isoform0005787
GO:0006342	chromatin silencing	4	77	0.493592	1	Isoform0044734;Isoform0059508;Isoform0065738;Isoform0067858
GO:0045814	negative regulation of gene expression, epigenetic	4	77	0.493592	1	Isoform0044734;Isoform0059508;Isoform0065738;Isoform0067858
GO:0006020	inositol metabolic process	2	35	0.495526	1	Isoform0016167;Isoform0039682
GO:0050789	regulation of biological process	163	3451	0.495848	1	Isoform0000167;Isoform0001307;Isoform0001909;Isoform0002371;Isoform0002438;Isoform0003230;Isoform0003250;Isoform0003319;Isoform0003391;Isoform0004357;Isoform0005631;Isoform0005853;Isoform0006376;Isoform0007040;Isoform0007225;Isoform0007413;Isoform0007476;Isoform0007811;Isoform0008029;Isoform0010713;Isoform0010730;Isoform0010994;Isoform0011044;Isoform0011447;Isoform0012289;Isoform0012416;Isoform00…
GO:0009743	response to carbohydrate	8	163	0.503488	1	Isoform0005003;Isoform0007492;Isoform0014778;Isoform0025625;Isoform0033230;Isoform0065467;Isoform0066004;Isoform0067574
GO:0016441	posttranscriptional gene silencing	4	78	0.503747	1	Isoform0044734;Isoform0049420;Isoform0059508;Isoform0067858
GO:0035194	posttranscriptional gene silencing by RNA	4	78	0.503747	1	Isoform0044734;Isoform0049420;Isoform0059508;Isoform0067858
GO:0045892	negative regulation of transcription, DNA-templated	4	78	0.503747	1	Isoform0044734;Isoform0059508;Isoform0065738;Isoform0067858
GO:1903507	negative regulation of nucleic acid-templated transcription	4	78	0.503747	1	Isoform0044734;Isoform0059508;Isoform0065738;Isoform0067858
GO:2000113	negative regulation of cellular macromolecule biosynthetic process	4	78	0.503747	1	Isoform0044734;Isoform0059508;Isoform0065738;Isoform0067858
GO:0042044	fluid transport	2	36	0.510597	1	Isoform0016176;Isoform0044178
GO:0019219	regulation of nucleobase-containing compound metabolic process	20	420	0.512026	1	Isoform0001909;Isoform0003230;Isoform0018637;Isoform0018888;Isoform0044734;Isoform0046003;Isoform0047582;Isoform0048728;Isoform0048967;Isoform0049997;Isoform0052183;Isoform0056152;Isoform0059508;Isoform0059616;Isoform0062699;Isoform0064597;Isoform0065738;Isoform0067858;Isoform0068862;Isoform0069043
GO:0043094	cellular metabolic compound salvage	3	58	0.518424	1	Isoform0055512;Isoform0063778;Isoform0072520
GO:0090501	RNA phosphodiester bond hydrolysis	4	80	0.523782	1	Isoform0019179;Isoform0063637;Isoform0070576;Isoform0071738
GO:0006482	protein demethylation	1	16	0.537882	1	Isoform0068862
GO:0007346	regulation of mitotic cell cycle	1	16	0.537882	1	Isoform0018888
GO:0008214	protein dealkylation	1	16	0.537882	1	Isoform0068862
GO:0009744	response to sucrose	1	16	0.537882	1	Isoform0065467
GO:0016577	histone demethylation	1	16	0.537882	1	Isoform0068862
GO:0030258	lipid modification	1	16	0.537882	1	Isoform0042933
GO:0034756	regulation of iron ion transport	1	16	0.537882	1	Isoform0065467
GO:0070076	histone lysine demethylation	1	16	0.537882	1	Isoform0068862
GO:0070988	demethylation	1	16	0.537882	1	Isoform0068862
GO:0072525	pyridine-containing compound biosynthetic process	1	16	0.537882	1	Isoform0026108
GO:0080190	lateral growth	1	16	0.537882	1	Isoform0065467
GO:0000375	RNA splicing, via transesterification reactions	3	60	0.541478	1	Isoform0009095;Isoform0049997;Isoform0056152
GO:0000377	RNA splicing, via transesterification reactions with bulged adenosine as nucleophile	3	60	0.541478	1	Isoform0009095;Isoform0049997;Isoform0056152
GO:0009887	organ morphogenesis	5	104	0.545474	1	Isoform0029037;Isoform0047692;Isoform0057738;Isoform0070815;Isoform0071373
GO:0048285	organelle fission	3	61	0.552763	1	Isoform0003300;Isoform0018515;Isoform0046003
GO:0009890	negative regulation of biosynthetic process	4	83	0.553083	1	Isoform0044734;Isoform0059508;Isoform0065738;Isoform0067858
GO:0010558	negative regulation of macromolecule biosynthetic process	4	83	0.553083	1	Isoform0044734;Isoform0059508;Isoform0065738;Isoform0067858
GO:0031327	negative regulation of cellular biosynthetic process	4	83	0.553083	1	Isoform0044734;Isoform0059508;Isoform0065738;Isoform0067858
GO:0045934	negative regulation of nucleobase-containing compound metabolic process	4	83	0.553083	1	Isoform0044734;Isoform0059508;Isoform0065738;Isoform0067858
GO:0051172	negative regulation of nitrogen compound metabolic process	4	83	0.553083	1	Isoform0044734;Isoform0059508;Isoform0065738;Isoform0067858
GO:0051253	negative regulation of RNA metabolic process	4	83	0.553083	1	Isoform0044734;Isoform0059508;Isoform0065738;Isoform0067858
GO:0090305	nucleic acid phosphodiester bond hydrolysis	4	83	0.553083	1	Isoform0019179;Isoform0063637;Isoform0070576;Isoform0071738
GO:1902679	negative regulation of RNA biosynthetic process	4	83	0.553083	1	Isoform0044734;Isoform0059508;Isoform0065738;Isoform0067858
GO:0009116	nucleoside metabolic process	7	151	0.571034	1	Isoform0019470;Isoform0020833;Isoform0024087;Isoform0024888;Isoform0025453;Isoform0033689;Isoform0036653
GO:0009119	ribonucleoside metabolic process	7	151	0.571034	1	Isoform0019470;Isoform0020833;Isoform0024087;Isoform0024888;Isoform0025453;Isoform0033689;Isoform0036653
GO:0009756	carbohydrate mediated signaling	4	85	0.572074	1	Isoform0025625;Isoform0033230;Isoform0066004;Isoform0067574
GO:0071322	cellular response to carbohydrate stimulus	4	85	0.572074	1	Isoform0025625;Isoform0033230;Isoform0066004;Isoform0067574
GO:0006081	cellular aldehyde metabolic process	1	18	0.580409	1	Isoform0031746
GO:0009247	glycolipid biosynthetic process	1	18	0.580409	1	Isoform0025611
GO:0009845	seed germination	1	18	0.580409	1	Isoform0065467
GO:0051193	regulation of cofactor metabolic process	1	18	0.580409	1	Isoform0065467
GO:0090056	regulation of chlorophyll metabolic process	1	18	0.580409	1	Isoform0065467
GO:0090351	seedling development	1	18	0.580409	1	Isoform0065467
GO:1901401	regulation of tetrapyrrole metabolic process	1	18	0.580409	1	Isoform0065467
GO:0031324	negative regulation of cellular metabolic process	4	87	0.590604	1	Isoform0044734;Isoform0059508;Isoform0065738;Isoform0067858
GO:0048513	animal organ development	8	176	0.591236	1	Isoform0029037;Isoform0041030;Isoform0047692;Isoform0049012;Isoform0057738;Isoform0065467;Isoform0070815;Isoform0071373
GO:0043623	cellular protein complex assembly	11	243	0.596609	1	Isoform0002481;Isoform0003564;Isoform0004632;Isoform0008722;Isoform0010024;Isoform0011577;Isoform0012405;Isoform0016850;Isoform0062699;Isoform0064597;Isoform0069043
GO:1901607	alpha-amino acid biosynthetic process	4	88	0.59969	1	Isoform0017647;Isoform0020709;Isoform0023257;Isoform0030783
GO:0009767	photosynthetic electron transport chain	1	19	0.600183	1	Isoform0039746
GO:0034728	nucleosome organization	1	19	0.600183	1	Isoform0000062
GO:0046467	membrane lipid biosynthetic process	1	19	0.600183	1	Isoform0025611
GO:0048581	negative regulation of post-embryonic development	1	19	0.600183	1	Isoform0068862
GO:0051093	negative regulation of developmental process	1	19	0.600183	1	Isoform0068862
GO:0051241	negative regulation of multicellular organismal process	1	19	0.600183	1	Isoform0068862
GO:0090304	nucleic acid metabolic process	79	1715	0.600643	1	Isoform0002058;Isoform0005488;Isoform0005631;Isoform0005907;Isoform0007274;Isoform0009095;Isoform0013891;Isoform0018637;Isoform0018888;Isoform0019179;Isoform0019267;Isoform0020090;Isoform0020933;Isoform0021464;Isoform0021782;Isoform0022794;Isoform0023112;Isoform0025625;Isoform0026309;Isoform0026779;Isoform0027053;Isoform0027877;Isoform0028162;Isoform0029167;Isoform0029346;Isoform0031169;Isoform00…
GO:0009409	response to cold	7	156	0.605669	1	Isoform0044784;Isoform0047692;Isoform0057738;Isoform0065467;Isoform0066004;Isoform0067574;Isoform0069431
GO:0048827	phyllome development	4	89	0.608654	1	Isoform0005787;Isoform0041030;Isoform0042935;Isoform0062997
GO:0071824	protein-DNA complex subunit organization	1	20	0.619027	1	Isoform0000062
GO:0009292	genetic transfer	2	45	0.632367	1	Isoform0047692;Isoform0057738
GO:0042592	homeostatic process	9	205	0.632539	1	Isoform0002606;Isoform0003681;Isoform0005787;Isoform0034090;Isoform0037328;Isoform0040420;Isoform0040580;Isoform0046662;Isoform0053145
GO:0055080	cation homeostasis	3	69	0.636796	1	Isoform0005787;Isoform0040580;Isoform0053145
GO:0098771	inorganic ion homeostasis	3	69	0.636796	1	Isoform0005787;Isoform0040580;Isoform0053145
GO:0006787	porphyrin-containing compound catabolic process	1	21	0.636983	1	Isoform0007492
GO:0009787	regulation of abscisic acid-activated signaling pathway	1	21	0.636983	1	Isoform0041184
GO:0033015	tetrapyrrole catabolic process	1	21	0.636983	1	Isoform0007492
GO:0051187	cofactor catabolic process	1	21	0.636983	1	Isoform0007492
GO:0055076	transition metal ion homeostasis	1	21	0.636983	1	Isoform0005787
GO:1901419	regulation of response to alcohol	1	21	0.636983	1	Isoform0041184
GO:0009260	ribonucleotide biosynthetic process	9	207	0.644005	1	Isoform0019470;Isoform0020833;Isoform0024087;Isoform0024888;Isoform0025453;Isoform0033689;Isoform0036653;Isoform0050227;Isoform0070622
GO:0046390	ribose phosphate biosynthetic process	9	207	0.644005	1	Isoform0019470;Isoform0020833;Isoform0024087;Isoform0024888;Isoform0025453;Isoform0033689;Isoform0036653;Isoform0050227;Isoform0070622
GO:0006188	IMP biosynthetic process	1	22	0.654094	1	Isoform0070622
GO:0008219	cell death	1	22	0.654094	1	Isoform0041184
GO:0010959	regulation of metal ion transport	1	22	0.654094	1	Isoform0065467
GO:0046040	IMP metabolic process	1	22	0.654094	1	Isoform0070622
GO:0048646	anatomical structure formation involved in morphogenesis	3	71	0.655993	1	Isoform0029037;Isoform0070815;Isoform0071373
GO:0009266	response to temperature stimulus	7	165	0.664075	1	Isoform0044784;Isoform0047692;Isoform0057738;Isoform0065467;Isoform0066004;Isoform0067574;Isoform0069431
GO:0044764	multi-organism cellular process	2	48	0.667331	1	Isoform0047692;Isoform0057738
GO:0051239	regulation of multicellular organismal process	10	234	0.668012	1	Isoform0018637;Isoform0018888;Isoform0021975;Isoform0033826;Isoform0043120;Isoform0048728;Isoform0065467;Isoform0066004;Isoform0067574;Isoform0068862
GO:2000026	regulation of multicellular organismal development	10	234	0.668012	1	Isoform0018637;Isoform0018888;Isoform0021975;Isoform0033826;Isoform0043120;Isoform0048728;Isoform0065467;Isoform0066004;Isoform0067574;Isoform0068862
GO:0016568	chromatin modification	15	347	0.670176	1	Isoform0018637;Isoform0018888;Isoform0025625;Isoform0029037;Isoform0033230;Isoform0045786;Isoform0046003;Isoform0047692;Isoform0048630;Isoform0048728;Isoform0057738;Isoform0067858;Isoform0068862;Isoform0070815;Isoform0071373
GO:0015766	disaccharide transport	1	23	0.670399	1	Isoform0022511
GO:0015772	oligosaccharide transport	1	23	0.670399	1	Isoform0022511
GO:0019684	photosynthesis, light reaction	1	23	0.670399	1	Isoform0039746
GO:0071407	cellular response to organic cyclic compound	6	143	0.670525	1	Isoform0044734;Isoform0049420;Isoform0049997;Isoform0056152;Isoform0059508;Isoform0067858
GO:0048523	negative regulation of cellular process	4	97	0.675778	1	Isoform0044734;Isoform0059508;Isoform0065738;Isoform0067858
GO:0045333	cellular respiration	2	49	0.678373	1	Isoform0049160;Isoform0057011
GO:0009737	response to abscisic acid	1	24	0.685937	1	Isoform0065467
GO:0097305	response to alcohol	1	24	0.685937	1	Isoform0065467
GO:0009066	aspartate family amino acid metabolic process	4	100	0.698783	1	Isoform0017647;Isoform0020709;Isoform0023257;Isoform0030783
GO:0016570	histone modification	12	288	0.708628	1	Isoform0018637;Isoform0018888;Isoform0025625;Isoform0033230;Isoform0045786;Isoform0046003;Isoform0047692;Isoform0048630;Isoform0048728;Isoform0057738;Isoform0067858;Isoform0068862
GO:0010053	root epidermal cell differentiation	2	52	0.709709	1	Isoform0066004;Isoform0067574
GO:0090627	plant epidermal cell differentiation	2	52	0.709709	1	Isoform0066004;Isoform0067574
GO:0050793	regulation of developmental process	10	243	0.712833	1	Isoform0018637;Isoform0018888;Isoform0021975;Isoform0033826;Isoform0043120;Isoform0048728;Isoform0065467;Isoform0066004;Isoform0067574;Isoform0068862
GO:0015979	photosynthesis	1	26	0.714851	1	Isoform0039746
GO:0009259	ribonucleotide metabolic process	9	221	0.718384	1	Isoform0019470;Isoform0020833;Isoform0024087;Isoform0024888;Isoform0025453;Isoform0033689;Isoform0036653;Isoform0050227;Isoform0070622
GO:0019693	ribose phosphate metabolic process	9	221	0.718384	1	Isoform0019470;Isoform0020833;Isoform0024087;Isoform0024888;Isoform0025453;Isoform0033689;Isoform0036653;Isoform0050227;Isoform0070622
GO:0006732	coenzyme metabolic process	14	336	0.718466	1	Isoform0001511;Isoform0005003;Isoform0009110;Isoform0014778;Isoform0017532;Isoform0018637;Isoform0025025;Isoform0025604;Isoform0026108;Isoform0034931;Isoform0045464;Isoform0048728;Isoform0054791;Isoform0064592
GO:0043170	macromolecule metabolic process	359	7789	0.718532	1	Isoform0000695;Isoform0000970;Isoform0001296;Isoform0001433;Isoform0001549;Isoform0002058;Isoform0002276;Isoform0002371;Isoform0002438;Isoform0002603;Isoform0003319;Isoform0004027;Isoform0004319;Isoform0004357;Isoform0004544;Isoform0004650;Isoform0004984;Isoform0005218;Isoform0005358;Isoform0005385;Isoform0005488;Isoform0005562;Isoform0005631;Isoform0005853;Isoform0005907;Isoform0005910;Isoform00…
GO:0016569	covalent chromatin modification	12	291	0.721696	1	Isoform0018637;Isoform0018888;Isoform0025625;Isoform0033230;Isoform0045786;Isoform0046003;Isoform0047692;Isoform0048630;Isoform0048728;Isoform0057738;Isoform0067858;Isoform0068862
GO:1901659	glycosyl compound biosynthetic process	7	176	0.727823	1	Isoform0019470;Isoform0020833;Isoform0024087;Isoform0024888;Isoform0025453;Isoform0033689;Isoform0036653
GO:0030003	cellular cation homeostasis	1	27	0.728296	1	Isoform0005787
GO:0010015	root morphogenesis	2	54	0.729151	1	Isoform0066004;Isoform0067574
GO:1901698	response to nitrogen compound	6	153	0.732009	1	Isoform0044734;Isoform0049420;Isoform0049997;Isoform0056152;Isoform0059508;Isoform0067858
GO:0050801	ion homeostasis	3	80	0.73325	1	Isoform0005787;Isoform0040580;Isoform0053145
GO:0009960	endosperm development	1	28	0.741107	1	Isoform0062997
GO:0048528	post-embryonic root development	1	28	0.741107	1	Isoform0041030
GO:0006996	organelle organization	52	1193	0.741937	1	Isoform0000062;Isoform0003300;Isoform0007492;Isoform0018515;Isoform0018637;Isoform0018888;Isoform0020090;Isoform0020933;Isoform0022794;Isoform0025625;Isoform0026309;Isoform0029037;Isoform0029167;Isoform0029346;Isoform0031169;Isoform0033230;Isoform0033826;Isoform0036757;Isoform0037003;Isoform0038591;Isoform0041810;Isoform0042560;Isoform0044178;Isoform0044734;Isoform0045786;Isoform0046003;Isoform00…
GO:0034622	cellular macromolecular complex assembly	11	273	0.743509	1	Isoform0002481;Isoform0003564;Isoform0004632;Isoform0008722;Isoform0010024;Isoform0011577;Isoform0012405;Isoform0016850;Isoform0062699;Isoform0064597;Isoform0069043
GO:0006139	nucleobase-containing compound metabolic process	101	2270	0.748008	1	Isoform0001511;Isoform0002058;Isoform0005488;Isoform0005631;Isoform0005907;Isoform0007274;Isoform0009095;Isoform0013131;Isoform0013891;Isoform0017532;Isoform0018637;Isoform0018888;Isoform0019179;Isoform0019267;Isoform0019470;Isoform0020090;Isoform0020833;Isoform0020933;Isoform0021464;Isoform0021782;Isoform0022794;Isoform0023112;Isoform0024087;Isoform0024888;Isoform0025453;Isoform0025625;Isoform00…
GO:0014070	response to organic cyclic compound	6	156	0.74878	1	Isoform0044734;Isoform0049420;Isoform0049997;Isoform0056152;Isoform0059508;Isoform0067858
GO:1902589	single-organism organelle organization	24	574	0.755341	1	Isoform0007492;Isoform0018637;Isoform0018888;Isoform0025625;Isoform0033230;Isoform0033826;Isoform0041810;Isoform0045786;Isoform0046003;Isoform0047579;Isoform0047692;Isoform0048630;Isoform0048728;Isoform0053308;Isoform0056149;Isoform0057738;Isoform0062945;Isoform0065467;Isoform0066004;Isoform0067399;Isoform0067472;Isoform0067574;Isoform0067858;Isoform0068862
GO:0009799	specification of symmetry	2	57	0.756233	1	Isoform0044734;Isoform0059508
GO:0007166	cell surface receptor signaling pathway	2	58	0.764726	1	Isoform0050379;Isoform0052584
GO:0016072	rRNA metabolic process	6	159	0.764779	1	Isoform0005907;Isoform0007274;Isoform0021782;Isoform0026779;Isoform0046040;Isoform0054893
GO:0048509	regulation of meristem development	2	59	0.772961	1	Isoform0018637;Isoform0048728
GO:0000725	recombinational repair	1	31	0.776032	1	Isoform0046003
GO:0001708	cell fate specification	1	31	0.776032	1	Isoform0062997
GO:0006397	mRNA processing	1	31	0.776032	1	Isoform0028162
GO:0008643	carbohydrate transport	1	31	0.776032	1	Isoform0022511
GO:0045165	cell fate commitment	1	31	0.776032	1	Isoform0062997
GO:0022622	root system development	3	86	0.776699	1	Isoform0041030;Isoform0066004;Isoform0067574
GO:0048364	root development	3	86	0.776699	1	Isoform0041030;Isoform0066004;Isoform0067574
GO:0010646	regulation of cell communication	5	137	0.778451	1	Isoform0010730;Isoform0041184;Isoform0057141;Isoform0059140;Isoform0065131
GO:0016265	death	2	60	0.780943	1	Isoform0041184;Isoform0065467
GO:0010564	regulation of cell cycle process	1	32	0.786594	1	Isoform0018888
GO:0048507	meristem development	8	213	0.790396	1	Isoform0018637;Isoform0044734;Isoform0048728;Isoform0059508;Isoform0062997;Isoform0065467;Isoform0066004;Isoform0067574
GO:0034285	response to disaccharide	2	62	0.796171	1	Isoform0007492;Isoform0065467
GO:0048367	shoot system development	6	166	0.799147	1	Isoform0005787;Isoform0041030;Isoform0042935;Isoform0047692;Isoform0057738;Isoform0062997
GO:0090567	reproductive shoot system development	3	90	0.802307	1	Isoform0005787;Isoform0047692;Isoform0057738
GO:0006766	vitamin metabolic process	2	63	0.803429	1	Isoform0002023;Isoform0011083
GO:0006767	water-soluble vitamin metabolic process	2	63	0.803429	1	Isoform0002023;Isoform0011083
GO:0018958	phenol-containing compound metabolic process	1	34	0.80625	1	Isoform0007492
GO:0008380	RNA splicing	3	91	0.808311	1	Isoform0009095;Isoform0049997;Isoform0056152
GO:0006873	cellular ion homeostasis	1	35	0.815389	1	Isoform0005787
GO:0055082	cellular chemical homeostasis	1	35	0.815389	1	Isoform0005787
GO:0034645	cellular macromolecule biosynthetic process	65	1522	0.816438	1	Isoform0002371;Isoform0002438;Isoform0003319;Isoform0005631;Isoform0006376;Isoform0007476;Isoform0007811;Isoform0011447;Isoform0012416;Isoform0013041;Isoform0013055;Isoform0013574;Isoform0013891;Isoform0014095;Isoform0015932;Isoform0016585;Isoform0016868;Isoform0017598;Isoform0018194;Isoform0018637;Isoform0019488;Isoform0021464;Isoform0024036;Isoform0025625;Isoform0025892;Isoform0027442;Isoform00…
GO:0006631	fatty acid metabolic process	19	482	0.818459	1	Isoform0005003;Isoform0005557;Isoform0005729;Isoform0005771;Isoform0007492;Isoform0014778;Isoform0021347;Isoform0023585;Isoform0028386;Isoform0030957;Isoform0033417;Isoform0039810;Isoform0041567;Isoform0042533;Isoform0046084;Isoform0047217;Isoform0048324;Isoform0058895;Isoform0065467
GO:0006950	response to stress	45	1076	0.818804	1	Isoform0002058;Isoform0002694;Isoform0002723;Isoform0004095;Isoform0004817;Isoform0005652;Isoform0005787;Isoform0005900;Isoform0006595;Isoform0007159;Isoform0007707;Isoform0009599;Isoform0011281;Isoform0012855;Isoform0017533;Isoform0020713;Isoform0025611;Isoform0026500;Isoform0027867;Isoform0028408;Isoform0035928;Isoform0040580;Isoform0041030;Isoform0041184;Isoform0044178;Isoform0044734;Isoform00…
GO:0000003	reproduction	21	529	0.819605	1	Isoform0002475;Isoform0002606;Isoform0003681;Isoform0005787;Isoform0021975;Isoform0031803;Isoform0033826;Isoform0042347;Isoform0042933;Isoform0043120;Isoform0045196;Isoform0047692;Isoform0051842;Isoform0055512;Isoform0057738;Isoform0058393;Isoform0062997;Isoform0063778;Isoform0066004;Isoform0067574;Isoform0072520
GO:0000226	microtubule cytoskeleton organization	1	36	0.824097	1	Isoform0033826
GO:0009966	regulation of signal transduction	1	36	0.824097	1	Isoform0041184
GO:0023051	regulation of signaling	1	36	0.824097	1	Isoform0041184
GO:0006869	lipid transport	1	37	0.832395	1	Isoform0009865
GO:0010260	organ senescence	1	37	0.832395	1	Isoform0065467
GO:0010876	lipid localization	1	37	0.832395	1	Isoform0009865
GO:0051640	organelle localization	1	37	0.832395	1	Isoform0050446
GO:0048878	chemical homeostasis	3	96	0.836062	1	Isoform0005787;Isoform0040580;Isoform0053145
GO:0010038	response to metal ion	2	68	0.836368	1	Isoform0044178;Isoform0065738
GO:0009062	fatty acid catabolic process	3	97	0.841177	1	Isoform0007492;Isoform0033417;Isoform0065467
GO:0072329	monocarboxylic acid catabolic process	3	97	0.841177	1	Isoform0007492;Isoform0033417;Isoform0065467
GO:0002376	immune system process	4	125	0.845683	1	Isoform0044734;Isoform0049420;Isoform0059508;Isoform0067858
GO:0044242	cellular lipid catabolic process	3	98	0.846154	1	Isoform0007492;Isoform0033417;Isoform0065467
GO:0006091	generation of precursor metabolites and energy	6	178	0.84886	1	Isoform0020046;Isoform0039746;Isoform0043356;Isoform0049160;Isoform0057011;Isoform0057253
GO:0016042	lipid catabolic process	3	99	0.850995	1	Isoform0007492;Isoform0033417;Isoform0065467
GO:0009888	tissue development	10	280	0.854154	1	Isoform0001909;Isoform0003230;Isoform0018637;Isoform0044734;Isoform0048728;Isoform0059508;Isoform0062997;Isoform0065467;Isoform0066004;Isoform0067574
GO:0006281	DNA repair	4	127	0.854276	1	Isoform0002058;Isoform0046003;Isoform0068097;Isoform0068558
GO:0055086	nucleobase-containing small molecule metabolic process	24	615	0.855656	1	Isoform0001511;Isoform0013131;Isoform0017532;Isoform0018637;Isoform0019470;Isoform0020833;Isoform0024087;Isoform0024888;Isoform0025453;Isoform0026108;Isoform0030111;Isoform0033417;Isoform0033689;Isoform0036653;Isoform0048728;Isoform0050227;Isoform0052130;Isoform0054791;Isoform0055512;Isoform0058388;Isoform0063778;Isoform0064592;Isoform0070622;Isoform0072520
GO:0046496	nicotinamide nucleotide metabolic process	5	154	0.856112	1	Isoform0001511;Isoform0017532;Isoform0026108;Isoform0054791;Isoform0064592
GO:0071554	cell wall organization or biogenesis	5	154	0.856112	1	Isoform0011044;Isoform0022440;Isoform0045786;Isoform0045948;Isoform0046175
GO:0019362	pyridine nucleotide metabolic process	5	155	0.859873	1	Isoform0001511;Isoform0017532;Isoform0026108;Isoform0054791;Isoform0064592
GO:0090407	organophosphate biosynthetic process	13	356	0.861144	1	Isoform0000890;Isoform0019470;Isoform0020833;Isoform0024087;Isoform0024888;Isoform0025453;Isoform0026108;Isoform0031457;Isoform0033689;Isoform0036653;Isoform0050227;Isoform0054118;Isoform0070622
GO:0006461	protein complex assembly	11	308	0.86349	1	Isoform0002481;Isoform0003564;Isoform0004632;Isoform0008722;Isoform0010024;Isoform0011577;Isoform0012405;Isoform0016850;Isoform0062699;Isoform0064597;Isoform0069043
GO:0006261	DNA-dependent DNA replication	1	42	0.868376	1	Isoform0046003
GO:0007186	G-protein coupled receptor signaling pathway	1	42	0.868376	1	Isoform0041030
GO:0009812	flavonoid metabolic process	1	42	0.868376	1	Isoform0042933
GO:0044786	cell cycle DNA replication	1	42	0.868376	1	Isoform0046003
GO:0070271	protein complex biogenesis	11	310	0.868723	1	Isoform0002481;Isoform0003564;Isoform0004632;Isoform0008722;Isoform0010024;Isoform0011577;Isoform0012405;Isoform0016850;Isoform0062699;Isoform0064597;Isoform0069043
GO:0022610	biological adhesion	2	74	0.869257	1	Isoform0066004;Isoform0067574
GO:0043933	macromolecular complex subunit organization	35	878	0.869333	1	Isoform0000062;Isoform0002481;Isoform0003564;Isoform0004632;Isoform0008722;Isoform0010024;Isoform0011577;Isoform0012405;Isoform0016850;Isoform0018637;Isoform0018888;Isoform0025625;Isoform0029037;Isoform0033230;Isoform0044734;Isoform0045786;Isoform0046003;Isoform0047454;Isoform0047473;Isoform0047692;Isoform0048630;Isoform0048728;Isoform0052453;Isoform0057738;Isoform0059508;Isoform0062699;Isoform00…
GO:0048731	system development	13	361	0.873276	1	Isoform0005787;Isoform0029037;Isoform0041030;Isoform0042935;Isoform0047692;Isoform0049012;Isoform0057738;Isoform0062997;Isoform0065467;Isoform0066004;Isoform0067574;Isoform0070815;Isoform0071373
GO:0072524	pyridine-containing compound metabolic process	5	159	0.874104	1	Isoform0001511;Isoform0017532;Isoform0026108;Isoform0054791;Isoform0064592
GO:0006464	cellular protein modification process	147	3382	0.874348	1	Isoform0000695;Isoform0002603;Isoform0004357;Isoform0004544;Isoform0004650;Isoform0005218;Isoform0006036;Isoform0006545;Isoform0006734;Isoform0007629;Isoform0008616;Isoform0010406;Isoform0010730;Isoform0013245;Isoform0014085;Isoform0014926;Isoform0015797;Isoform0017858;Isoform0018125;Isoform0018127;Isoform0018186;Isoform0018272;Isoform0018301;Isoform0018577;Isoform0018637;Isoform0018756;Isoform00…
GO:0048366	leaf development	1	43	0.874587	1	Isoform0062997
GO:1901657	glycosyl compound metabolic process	7	212	0.876151	1	Isoform0019470;Isoform0020833;Isoform0024087;Isoform0024888;Isoform0025453;Isoform0033689;Isoform0036653
GO:0006733	oxidoreduction coenzyme metabolic process	5	160	0.877464	1	Isoform0001511;Isoform0017532;Isoform0026108;Isoform0054791;Isoform0064592
GO:0005984	disaccharide metabolic process	5	161	0.880748	1	Isoform0022511;Isoform0047331;Isoform0051553;Isoform0055935;Isoform0059257
GO:0072522	purine-containing compound biosynthetic process	5	161	0.880748	1	Isoform0050227;Isoform0055512;Isoform0063778;Isoform0070622;Isoform0072520
GO:0009165	nucleotide biosynthetic process	10	290	0.881039	1	Isoform0019470;Isoform0020833;Isoform0024087;Isoform0024888;Isoform0025453;Isoform0026108;Isoform0033689;Isoform0036653;Isoform0050227;Isoform0070622
GO:0090558	plant epidermis development	2	77	0.883318	1	Isoform0066004;Isoform0067574
GO:0010154	fruit development	1	45	0.886145	1	Isoform0062997
GO:0048316	seed development	1	45	0.886145	1	Isoform0062997
GO:0022607	cellular component assembly	14	392	0.88758	1	Isoform0002481;Isoform0003564;Isoform0004632;Isoform0008722;Isoform0010024;Isoform0011577;Isoform0012405;Isoform0016850;Isoform0037003;Isoform0037218;Isoform0038591;Isoform0062699;Isoform0064597;Isoform0069043
GO:0006974	cellular response to DNA damage stimulus	4	136	0.888069	1	Isoform0002058;Isoform0046003;Isoform0068097;Isoform0068558
GO:0036211	protein modification process	147	3399	0.888434	1	Isoform0000695;Isoform0002603;Isoform0004357;Isoform0004544;Isoform0004650;Isoform0005218;Isoform0006036;Isoform0006545;Isoform0006734;Isoform0007629;Isoform0008616;Isoform0010406;Isoform0010730;Isoform0013245;Isoform0014085;Isoform0014926;Isoform0015797;Isoform0017858;Isoform0018125;Isoform0018127;Isoform0018186;Isoform0018272;Isoform0018301;Isoform0018577;Isoform0018637;Isoform0018756;Isoform00…
GO:0000041	transition metal ion transport	1	46	0.891518	1	Isoform0005787
GO:0009059	macromolecule biosynthetic process	66	1605	0.894546	1	Isoform0002371;Isoform0002438;Isoform0003319;Isoform0005631;Isoform0006376;Isoform0007476;Isoform0007811;Isoform0011447;Isoform0012416;Isoform0013041;Isoform0013055;Isoform0013574;Isoform0013891;Isoform0014095;Isoform0015932;Isoform0016585;Isoform0016868;Isoform0017598;Isoform0018194;Isoform0018637;Isoform0019488;Isoform0021464;Isoform0024036;Isoform0025611;Isoform0025625;Isoform0025892;Isoform00…
GO:0009955	adaxial/abaxial pattern specification	1	47	0.896639	1	Isoform0062997
GO:0044723	single-organism carbohydrate metabolic process	25	662	0.896801	1	Isoform0001451;Isoform0010634;Isoform0012309;Isoform0015998;Isoform0016167;Isoform0019488;Isoform0020046;Isoform0020883;Isoform0022511;Isoform0031366;Isoform0036757;Isoform0039357;Isoform0039682;Isoform0043356;Isoform0044560;Isoform0045627;Isoform0046245;Isoform0046638;Isoform0047331;Isoform0051553;Isoform0055395;Isoform0055935;Isoform0057253;Isoform0059257;Isoform0062026
GO:0048608	reproductive structure development	4	140	0.900751	1	Isoform0005787;Isoform0047692;Isoform0057738;Isoform0062997
GO:0061458	reproductive system development	4	140	0.900751	1	Isoform0005787;Isoform0047692;Isoform0057738;Isoform0062997
GO:0009267	cellular response to starvation	1	48	0.901518	1	Isoform0065467
GO:0042594	response to starvation	1	48	0.901518	1	Isoform0065467
GO:0009933	meristem structural organization	3	112	0.902777	1	Isoform0044734;Isoform0059508;Isoform0062997
GO:0048532	anatomical structure arrangement	3	112	0.902777	1	Isoform0044734;Isoform0059508;Isoform0062997
GO:0006739	NADP metabolic process	4	141	0.903717	1	Isoform0001511;Isoform0017532;Isoform0054791;Isoform0064592
GO:0016054	organic acid catabolic process	3	113	0.905995	1	Isoform0007492;Isoform0033417;Isoform0065467
GO:0046395	carboxylic acid catabolic process	3	113	0.905995	1	Isoform0007492;Isoform0033417;Isoform0065467
GO:0031668	cellular response to extracellular stimulus	1	49	0.906167	1	Isoform0065467
GO:0031669	cellular response to nutrient levels	1	49	0.906167	1	Isoform0065467
GO:0048569	post-embryonic organ development	1	49	0.906167	1	Isoform0041030
GO:0071496	cellular response to external stimulus	1	49	0.906167	1	Isoform0065467
GO:0006511	ubiquitin-dependent protein catabolic process	1	50	0.910596	1	Isoform0002058
GO:0009991	response to extracellular stimulus	1	50	0.910596	1	Isoform0065467
GO:0031667	response to nutrient levels	1	50	0.910596	1	Isoform0065467
GO:0046488	phosphatidylinositol metabolic process	1	50	0.910596	1	Isoform0022686
GO:0016310	phosphorylation	8	253	0.913348	1	Isoform0002092;Isoform0022097;Isoform0026553;Isoform0029405;Isoform0032292;Isoform0038658;Isoform0042889;Isoform0065467
GO:1901293	nucleoside phosphate biosynthetic process	10	305	0.913669	1	Isoform0019470;Isoform0020833;Isoform0024087;Isoform0024888;Isoform0025453;Isoform0026108;Isoform0033689;Isoform0036653;Isoform0050227;Isoform0070622
GO:0051235	maintenance of location	2	85	0.914253	1	Isoform0066004;Isoform0067574
GO:0006558	L-phenylalanine metabolic process	4	145	0.914809	1	Isoform0007492;Isoform0033015;Isoform0045764;Isoform0047199
GO:1902221	erythrose 4-phosphate/phosphoenolpyruvate family amino acid metabolic process	4	145	0.914809	1	Isoform0007492;Isoform0033015;Isoform0045764;Isoform0047199
GO:0019321	pentose metabolic process	1	51	0.914817	1	Isoform0055395
GO:0044085	cellular component biogenesis	19	530	0.914918	1	Isoform0002481;Isoform0003564;Isoform0004632;Isoform0005907;Isoform0008722;Isoform0010024;Isoform0011577;Isoform0012405;Isoform0016850;Isoform0021782;Isoform0026779;Isoform0037003;Isoform0037218;Isoform0038591;Isoform0046040;Isoform0054893;Isoform0062699;Isoform0064597;Isoform0069043
GO:0043412	macromolecule modification	150	3502	0.914923	1	Isoform0000695;Isoform0002603;Isoform0004357;Isoform0004544;Isoform0004650;Isoform0005218;Isoform0006036;Isoform0006545;Isoform0006734;Isoform0007629;Isoform0008616;Isoform0010406;Isoform0010730;Isoform0013245;Isoform0014085;Isoform0014926;Isoform0015797;Isoform0017858;Isoform0018125;Isoform0018127;Isoform0018186;Isoform0018272;Isoform0018301;Isoform0018577;Isoform0018637;Isoform0018756;Isoform00…
GO:0006955	immune response	3	116	0.915078	1	Isoform0044734;Isoform0059508;Isoform0067858
GO:0045087	innate immune response	3	116	0.915078	1	Isoform0044734;Isoform0059508;Isoform0067858
GO:0006625	protein targeting to peroxisome	2	86	0.917528	1	Isoform0007492;Isoform0065467
GO:0043574	peroxisomal transport	2	86	0.917528	1	Isoform0007492;Isoform0065467
GO:0072662	protein localization to peroxisome	2	86	0.917528	1	Isoform0007492;Isoform0065467
GO:0072663	establishment of protein localization to peroxisome	2	86	0.917528	1	Isoform0007492;Isoform0065467
GO:0006498	N-terminal protein lipidation	2	87	0.920685	1	Isoform0038147;Isoform0065271
GO:0031365	N-terminal protein amino acid modification	2	87	0.920685	1	Isoform0038147;Isoform0065271
GO:0009311	oligosaccharide metabolic process	5	176	0.921643	1	Isoform0022511;Isoform0047331;Isoform0051553;Isoform0055935;Isoform0059257
GO:0099402	plant organ development	6	205	0.924614	1	Isoform0005787;Isoform0041030;Isoform0042935;Isoform0062997;Isoform0066004;Isoform0067574
GO:0019538	protein metabolic process	201	4639	0.925518	1	Isoform0000695;Isoform0000970;Isoform0001296;Isoform0002058;Isoform0002276;Isoform0002603;Isoform0004027;Isoform0004319;Isoform0004357;Isoform0004544;Isoform0004650;Isoform0005218;Isoform0005853;Isoform0005958;Isoform0006036;Isoform0006196;Isoform0006545;Isoform0006734;Isoform0007053;Isoform0007372;Isoform0007413;Isoform0007619;Isoform0007629;Isoform0008602;Isoform0008616;Isoform0008854;Isoform00…
GO:0009893	positive regulation of metabolic process	1	54	0.926322	1	Isoform0025611
GO:1901565	organonitrogen compound catabolic process	1	54	0.926322	1	Isoform0007492
GO:0043648	dicarboxylic acid metabolic process	2	89	0.926661	1	Isoform0033308;Isoform0044178
GO:0044282	small molecule catabolic process	3	121	0.928456	1	Isoform0007492;Isoform0033417;Isoform0065467
GO:0032787	monocarboxylic acid metabolic process	39	1019	0.928843	1	Isoform0002092;Isoform0002238;Isoform0003429;Isoform0003958;Isoform0004280;Isoform0005003;Isoform0005557;Isoform0005729;Isoform0005771;Isoform0007492;Isoform0014778;Isoform0019694;Isoform0021347;Isoform0022097;Isoform0022243;Isoform0023585;Isoform0026553;Isoform0028386;Isoform0029405;Isoform0029477;Isoform0030957;Isoform0031547;Isoform0032292;Isoform0033417;Isoform0033596;Isoform0037218;Isoform00…
GO:0065003	macromolecular complex assembly	11	340	0.929545	1	Isoform0002481;Isoform0003564;Isoform0004632;Isoform0008722;Isoform0010024;Isoform0011577;Isoform0012405;Isoform0016850;Isoform0062699;Isoform0064597;Isoform0069043
GO:0007568	aging	1	55	0.929801	1	Isoform0065467
GO:0005991	trehalose metabolic process	2	91	0.932211	1	Isoform0051553;Isoform0055935
GO:0000302	response to reactive oxygen species	1	56	0.933116	1	Isoform0065467
GO:0048583	regulation of response to stimulus	1	56	0.933116	1	Isoform0041184
GO:0003006	developmental process involved in reproduction	17	496	0.935269	1	Isoform0002606;Isoform0003681;Isoform0005787;Isoform0021975;Isoform0033826;Isoform0042347;Isoform0042933;Isoform0043120;Isoform0045196;Isoform0047692;Isoform0055512;Isoform0057738;Isoform0062997;Isoform0063778;Isoform0066004;Isoform0067574;Isoform0072520
GO:0019941	modification-dependent protein catabolic process	5	183	0.936072	1	Isoform0002058;Isoform0062699;Isoform0063293;Isoform0064597;Isoform0069043
GO:0043632	modification-dependent macromolecule catabolic process	5	183	0.936072	1	Isoform0002058;Isoform0062699;Isoform0063293;Isoform0064597;Isoform0069043
GO:0007031	peroxisome organization	2	93	0.937361	1	Isoform0007492;Isoform0065467
GO:0009725	response to hormone	15	448	0.937883	1	Isoform0007065;Isoform0010994;Isoform0011447;Isoform0014095;Isoform0025892;Isoform0027442;Isoform0049940;Isoform0051187;Isoform0060436;Isoform0060867;Isoform0064311;Isoform0065467;Isoform0066004;Isoform0067574;Isoform0068862
GO:0034641	cellular nitrogen compound metabolic process	111	2675	0.93827	1	Isoform0001511;Isoform0002023;Isoform0002058;Isoform0005488;Isoform0005631;Isoform0005907;Isoform0006426;Isoform0007274;Isoform0007492;Isoform0009095;Isoform0011083;Isoform0013131;Isoform0013891;Isoform0017532;Isoform0017647;Isoform0018637;Isoform0018888;Isoform0019179;Isoform0019267;Isoform0019470;Isoform0020090;Isoform0020709;Isoform0020833;Isoform0020933;Isoform0021464;Isoform0021782;Isoform00…
GO:0006355	regulation of transcription, DNA-templated	12	372	0.938452	1	Isoform0001909;Isoform0003230;Isoform0044734;Isoform0047582;Isoform0048967;Isoform0049997;Isoform0052183;Isoform0056152;Isoform0059508;Isoform0065738;Isoform0067858;Isoform0068862
GO:1903506	regulation of nucleic acid-templated transcription	12	372	0.938452	1	Isoform0001909;Isoform0003230;Isoform0044734;Isoform0047582;Isoform0048967;Isoform0049997;Isoform0052183;Isoform0056152;Isoform0059508;Isoform0065738;Isoform0067858;Isoform0068862
GO:0071704	organic substance metabolic process	486	10777	0.939281	1	Isoform0000488;Isoform0000670;Isoform0000695;Isoform0000890;Isoform0000970;Isoform0001203;Isoform0001296;Isoform0001433;Isoform0001451;Isoform0001511;Isoform0001549;Isoform0002023;Isoform0002058;Isoform0002092;Isoform0002238;Isoform0002276;Isoform0002371;Isoform0002438;Isoform0002603;Isoform0002908;Isoform0003229;Isoform0003319;Isoform0003429;Isoform0003793;Isoform0003958;Isoform0004027;Isoform00…
GO:0006596	polyamine biosynthetic process	1	58	0.939284	1	Isoform0042347
GO:0009309	amine biosynthetic process	1	58	0.939284	1	Isoform0042347
GO:0042401	cellular biogenic amine biosynthetic process	1	58	0.939284	1	Isoform0042347
GO:1901701	cellular response to oxygen-containing compound	4	157	0.941553	1	Isoform0025625;Isoform0033230;Isoform0066004;Isoform0067574
GO:0046483	heterocycle metabolic process	105	2547	0.941905	1	Isoform0001511;Isoform0002023;Isoform0002058;Isoform0005488;Isoform0005631;Isoform0005907;Isoform0006426;Isoform0007274;Isoform0007492;Isoform0009095;Isoform0011083;Isoform0013131;Isoform0013891;Isoform0017532;Isoform0018637;Isoform0018888;Isoform0019179;Isoform0019267;Isoform0019470;Isoform0020090;Isoform0020833;Isoform0020933;Isoform0021464;Isoform0021782;Isoform0022794;Isoform0023112;Isoform00…
GO:0000904	cell morphogenesis involved in differentiation	3	128	0.943948	1	Isoform0046003;Isoform0066004;Isoform0067574
GO:0044712	single-organism catabolic process	3	128	0.943948	1	Isoform0007492;Isoform0033417;Isoform0065467
GO:0022414	reproductive process	17	504	0.944357	1	Isoform0002606;Isoform0003681;Isoform0005787;Isoform0021975;Isoform0033826;Isoform0042347;Isoform0042933;Isoform0043120;Isoform0045196;Isoform0047692;Isoform0055512;Isoform0057738;Isoform0062997;Isoform0063778;Isoform0066004;Isoform0067574;Isoform0072520
GO:0044763	single-organism cellular process	289	6593	0.944849	1	Isoform0000890;Isoform0001242;Isoform0001511;Isoform0002023;Isoform0002058;Isoform0002092;Isoform0002238;Isoform0002409;Isoform0002456;Isoform0002481;Isoform0002606;Isoform0003429;Isoform0003564;Isoform0003665;Isoform0003681;Isoform0003958;Isoform0004280;Isoform0004358;Isoform0004632;Isoform0005003;Isoform0005139;Isoform0005557;Isoform0005729;Isoform0005771;Isoform0005787;Isoform0005853;Isoform00…
GO:0006418	tRNA aminoacylation for protein translation	3	129	0.945889	1	Isoform0013891;Isoform0021464;Isoform0059315
GO:0044260	cellular macromolecule metabolic process	292	6666	0.947903	1	Isoform0000695;Isoform0001433;Isoform0002058;Isoform0002371;Isoform0002438;Isoform0002603;Isoform0003319;Isoform0004357;Isoform0004544;Isoform0004650;Isoform0005218;Isoform0005488;Isoform0005631;Isoform0005907;Isoform0005910;Isoform0006036;Isoform0006376;Isoform0006545;Isoform0006734;Isoform0006899;Isoform0007274;Isoform0007476;Isoform0007629;Isoform0007811;Isoform0008602;Isoform0008616;Isoform00…
GO:2001141	regulation of RNA biosynthetic process	12	380	0.948294	1	Isoform0001909;Isoform0003230;Isoform0044734;Isoform0047582;Isoform0048967;Isoform0049997;Isoform0052183;Isoform0056152;Isoform0059508;Isoform0065738;Isoform0067858;Isoform0068862
GO:0009072	aromatic amino acid family metabolic process	4	161	0.948605	1	Isoform0007492;Isoform0033015;Isoform0045764;Isoform0047199
GO:0051252	regulation of RNA metabolic process	12	381	0.949422	1	Isoform0001909;Isoform0003230;Isoform0044734;Isoform0047582;Isoform0048967;Isoform0049997;Isoform0052183;Isoform0056152;Isoform0059508;Isoform0065738;Isoform0067858;Isoform0068862
GO:0042221	response to chemical	39	1047	0.951472	1	Isoform0000091;Isoform0000608;Isoform0002258;Isoform0005003;Isoform0005900;Isoform0007065;Isoform0007492;Isoform0010994;Isoform0011447;Isoform0014095;Isoform0014708;Isoform0014778;Isoform0019428;Isoform0025625;Isoform0025892;Isoform0027442;Isoform0027543;Isoform0029984;Isoform0030357;Isoform0033230;Isoform0041450;Isoform0044178;Isoform0044734;Isoform0049420;Isoform0049940;Isoform0049997;Isoform00…
GO:0009117	nucleotide metabolic process	18	537	0.95213	1	Isoform0001511;Isoform0017532;Isoform0018637;Isoform0019470;Isoform0020833;Isoform0024087;Isoform0024888;Isoform0025453;Isoform0026108;Isoform0033689;Isoform0036653;Isoform0048728;Isoform0050227;Isoform0052130;Isoform0054791;Isoform0058388;Isoform0064592;Isoform0070622
GO:0019439	aromatic compound catabolic process	1	63	0.952332	1	Isoform0007492
GO:0048229	gametophyte development	2	100	0.952612	1	Isoform0042347;Isoform0046003
GO:0051186	cofactor metabolic process	16	487	0.952663	1	Isoform0001511;Isoform0005003;Isoform0006426;Isoform0007492;Isoform0009110;Isoform0014778;Isoform0017532;Isoform0018637;Isoform0025025;Isoform0025604;Isoform0026108;Isoform0034931;Isoform0045464;Isoform0048728;Isoform0054791;Isoform0064592
GO:0033365	protein localization to organelle	2	101	0.954478	1	Isoform0007492;Isoform0065467
GO:0072594	establishment of protein localization to organelle	2	101	0.954478	1	Isoform0007492;Isoform0065467
GO:0006595	polyamine metabolic process	1	64	0.954584	1	Isoform0042347
GO:0050794	regulation of cellular process	83	2074	0.954717	1	Isoform0000167;Isoform0001909;Isoform0003230;Isoform0004357;Isoform0005853;Isoform0007413;Isoform0010730;Isoform0010994;Isoform0011447;Isoform0013891;Isoform0014095;Isoform0017066;Isoform0018637;Isoform0018888;Isoform0018965;Isoform0024185;Isoform0024619;Isoform0025625;Isoform0025892;Isoform0026288;Isoform0026645;Isoform0027390;Isoform0027442;Isoform0028977;Isoform0030248;Isoform0031232;Isoform00…
GO:0007015	actin filament organization	2	102	0.956273	1	Isoform0066004;Isoform0067574
GO:0044270	cellular nitrogen compound catabolic process	1	65	0.95673	1	Isoform0007492
GO:0046700	heterocycle catabolic process	1	65	0.95673	1	Isoform0007492
GO:0044699	single-organism process	392	8842	0.958294	1	Isoform0000353;Isoform0000488;Isoform0000670;Isoform0000787;Isoform0000804;Isoform0000890;Isoform0000923;Isoform0001179;Isoform0001203;Isoform0001242;Isoform0001271;Isoform0001294;Isoform0001301;Isoform0001355;Isoform0001451;Isoform0001511;Isoform0001836;Isoform0002023;Isoform0002058;Isoform0002092;Isoform0002238;Isoform0002409;Isoform0002456;Isoform0002481;Isoform0002606;Isoform0002908;Isoform00…
GO:0000160	phosphorelay signal transduction system	1	66	0.958774	1	Isoform0065467
GO:1901361	organic cyclic compound catabolic process	1	66	0.958774	1	Isoform0007492
GO:0006694	steroid biosynthetic process	1	67	0.960722	1	Isoform0042933
GO:0033993	response to lipid	1	67	0.960722	1	Isoform0065467
GO:0006753	nucleoside phosphate metabolic process	18	548	0.961322	1	Isoform0001511;Isoform0017532;Isoform0018637;Isoform0019470;Isoform0020833;Isoform0024087;Isoform0024888;Isoform0025453;Isoform0026108;Isoform0033689;Isoform0036653;Isoform0048728;Isoform0050227;Isoform0052130;Isoform0054791;Isoform0058388;Isoform0064592;Isoform0070622
GO:0016071	mRNA metabolic process	1	68	0.962578	1	Isoform0028162
GO:0030029	actin filament-based process	2	106	0.962798	1	Isoform0066004;Isoform0067574
GO:0030036	actin cytoskeleton organization	2	106	0.962798	1	Isoform0066004;Isoform0067574
GO:0032989	cellular component morphogenesis	5	201	0.962856	1	Isoform0017066;Isoform0046003;Isoform0066004;Isoform0067574;Isoform0068862
GO:1901137	carbohydrate derivative biosynthetic process	11	369	0.963611	1	Isoform0019470;Isoform0019488;Isoform0020833;Isoform0024087;Isoform0024888;Isoform0025453;Isoform0025611;Isoform0033689;Isoform0036653;Isoform0050227;Isoform0070622
GO:0072521	purine-containing compound metabolic process	5	203	0.965087	1	Isoform0050227;Isoform0055512;Isoform0063778;Isoform0070622;Isoform0072520
GO:0071822	protein complex subunit organization	14	451	0.965812	1	Isoform0000062;Isoform0002481;Isoform0003564;Isoform0004632;Isoform0008722;Isoform0010024;Isoform0011577;Isoform0012405;Isoform0016850;Isoform0062699;Isoform0064597;Isoform0066004;Isoform0067574;Isoform0069043
GO:0044702	single organism reproductive process	4	174	0.966474	1	Isoform0005787;Isoform0047692;Isoform0057738;Isoform0062997
GO:0010033	response to organic substance	26	758	0.967607	1	Isoform0005003;Isoform0007065;Isoform0007492;Isoform0010994;Isoform0011447;Isoform0014095;Isoform0014778;Isoform0025625;Isoform0025892;Isoform0027442;Isoform0033230;Isoform0044734;Isoform0049420;Isoform0049940;Isoform0049997;Isoform0051187;Isoform0056152;Isoform0059508;Isoform0060436;Isoform0060867;Isoform0064311;Isoform0065467;Isoform0066004;Isoform0067574;Isoform0067858;Isoform0068862
GO:0022900	electron transport chain	1	71	0.967637	1	Isoform0039746
GO:0042886	amide transport	1	72	0.969167	1	Isoform0016176
GO:0071310	cellular response to organic substance	18	561	0.970166	1	Isoform0010994;Isoform0025625;Isoform0027442;Isoform0033230;Isoform0044734;Isoform0049420;Isoform0049940;Isoform0049997;Isoform0051187;Isoform0056152;Isoform0059508;Isoform0060436;Isoform0060867;Isoform0064311;Isoform0065467;Isoform0066004;Isoform0067574;Isoform0067858
GO:0009653	anatomical structure morphogenesis	13	431	0.970318	1	Isoform0017066;Isoform0029037;Isoform0044734;Isoform0046003;Isoform0047692;Isoform0057738;Isoform0059508;Isoform0062997;Isoform0066004;Isoform0067574;Isoform0068862;Isoform0070815;Isoform0071373
GO:0006074	(1->3)-beta-D-glucan metabolic process	1	73	0.970624	1	Isoform0072166
GO:0070887	cellular response to chemical stimulus	18	562	0.970765	1	Isoform0010994;Isoform0025625;Isoform0027442;Isoform0033230;Isoform0044734;Isoform0049420;Isoform0049940;Isoform0049997;Isoform0051187;Isoform0056152;Isoform0059508;Isoform0060436;Isoform0060867;Isoform0064311;Isoform0065467;Isoform0066004;Isoform0067574;Isoform0067858
GO:0006497	protein lipidation	2	112	0.970863	1	Isoform0038147;Isoform0065271
GO:0042157	lipoprotein metabolic process	2	112	0.970863	1	Isoform0038147;Isoform0065271
GO:0042158	lipoprotein biosynthetic process	2	112	0.970863	1	Isoform0038147;Isoform0065271
GO:1901700	response to oxygen-containing compound	8	298	0.972633	1	Isoform0005003;Isoform0007492;Isoform0014778;Isoform0025625;Isoform0033230;Isoform0065467;Isoform0066004;Isoform0067574
GO:0009699	phenylpropanoid biosynthetic process	3	148	0.972721	1	Isoform0033015;Isoform0045764;Isoform0047199
GO:0007275	multicellular organism development	20	618	0.973454	1	Isoform0005787;Isoform0006348;Isoform0009604;Isoform0013696;Isoform0029037;Isoform0041030;Isoform0042347;Isoform0042935;Isoform0044734;Isoform0046003;Isoform0047692;Isoform0049012;Isoform0057738;Isoform0059508;Isoform0062997;Isoform0065467;Isoform0066004;Isoform0067574;Isoform0070815;Isoform0071373
GO:0010035	response to inorganic substance	2	115	0.974235	1	Isoform0044178;Isoform0065738
GO:1901360	organic cyclic compound metabolic process	114	2834	0.974508	1	Isoform0000488;Isoform0000670;Isoform0001511;Isoform0002023;Isoform0002058;Isoform0002908;Isoform0003229;Isoform0005488;Isoform0005631;Isoform0005907;Isoform0006426;Isoform0007274;Isoform0007492;Isoform0009095;Isoform0010885;Isoform0011083;Isoform0013131;Isoform0013891;Isoform0017532;Isoform0018637;Isoform0018888;Isoform0019179;Isoform0019267;Isoform0019470;Isoform0020090;Isoform0020833;Isoform00…
GO:0051603	proteolysis involved in cellular protein catabolic process	6	243	0.974589	1	Isoform0002058;Isoform0036757;Isoform0062699;Isoform0063293;Isoform0064597;Isoform0069043
GO:0043038	amino acid activation	3	150	0.974658	1	Isoform0013891;Isoform0021464;Isoform0059315
GO:0043039	tRNA aminoacylation	3	150	0.974658	1	Isoform0013891;Isoform0021464;Isoform0059315
GO:0006576	cellular biogenic amine metabolic process	1	77	0.975797	1	Isoform0042347
GO:0044106	cellular amine metabolic process	1	77	0.975797	1	Isoform0042347
GO:0009719	response to endogenous stimulus	15	495	0.976888	1	Isoform0007065;Isoform0010994;Isoform0011447;Isoform0014095;Isoform0025892;Isoform0027442;Isoform0049940;Isoform0051187;Isoform0060436;Isoform0060867;Isoform0064311;Isoform0065467;Isoform0066004;Isoform0067574;Isoform0068862
GO:0035556	intracellular signal transduction	7	277	0.977898	1	Isoform0005853;Isoform0007413;Isoform0017066;Isoform0024185;Isoform0028977;Isoform0057045;Isoform0065467
GO:0043604	amide biosynthetic process	7	277	0.977898	1	Isoform0013891;Isoform0017647;Isoform0020709;Isoform0021464;Isoform0023257;Isoform0030783;Isoform0059315
GO:0051726	regulation of cell cycle	1	79	0.978032	1	Isoform0018888
GO:0000902	cell morphogenesis	4	187	0.978414	1	Isoform0046003;Isoform0066004;Isoform0067574;Isoform0068862
GO:0006812	cation transport	19	603	0.978602	1	Isoform0005787;Isoform0007684;Isoform0023796;Isoform0024388;Isoform0034156;Isoform0035461;Isoform0040580;Isoform0045585;Isoform0046255;Isoform0046433;Isoform0047138;Isoform0053145;Isoform0054727;Isoform0058818;Isoform0062258;Isoform0062510;Isoform0065674;Isoform0065738;Isoform0070102
GO:0050896	response to stimulus	91	2326	0.978829	1	Isoform0000091;Isoform0000608;Isoform0002023;Isoform0002058;Isoform0002258;Isoform0002694;Isoform0002723;Isoform0004095;Isoform0004817;Isoform0005003;Isoform0005652;Isoform0005787;Isoform0005853;Isoform0005900;Isoform0006595;Isoform0007065;Isoform0007159;Isoform0007413;Isoform0007492;Isoform0007707;Isoform0009599;Isoform0010994;Isoform0011083;Isoform0011281;Isoform0011447;Isoform0012855;Isoform00…
GO:0009606	tropism	1	81	0.98006	1	Isoform0068862
GO:0030163	protein catabolic process	6	251	0.980062	1	Isoform0002058;Isoform0036757;Isoform0062699;Isoform0063293;Isoform0064597;Isoform0069043
GO:0044257	cellular protein catabolic process	6	251	0.980062	1	Isoform0002058;Isoform0036757;Isoform0062699;Isoform0063293;Isoform0064597;Isoform0069043
GO:0006886	intracellular protein transport	9	339	0.98063	1	Isoform0007274;Isoform0007492;Isoform0010240;Isoform0017066;Isoform0061110;Isoform0061250;Isoform0062036;Isoform0065467;Isoform0066147
GO:0065008	regulation of biological quality	11	395	0.980742	1	Isoform0002606;Isoform0003681;Isoform0005787;Isoform0034090;Isoform0037328;Isoform0040420;Isoform0040580;Isoform0046662;Isoform0053145;Isoform0066004;Isoform0067574
GO:0006396	RNA processing	14	478	0.981429	1	Isoform0005907;Isoform0009095;Isoform0021782;Isoform0026779;Isoform0028162;Isoform0044734;Isoform0046040;Isoform0049420;Isoform0049997;Isoform0052546;Isoform0054893;Isoform0056152;Isoform0059508;Isoform0067858
GO:1901605	alpha-amino acid metabolic process	15	505	0.981547	1	Isoform0007492;Isoform0017647;Isoform0019470;Isoform0020709;Isoform0020833;Isoform0023257;Isoform0024087;Isoform0024888;Isoform0025453;Isoform0030783;Isoform0033015;Isoform0033689;Isoform0036653;Isoform0045764;Isoform0047199
GO:0044710	single-organism metabolic process	223	5304	0.982609	1	Isoform0000488;Isoform0000670;Isoform0000787;Isoform0000804;Isoform0000890;Isoform0000923;Isoform0001179;Isoform0001203;Isoform0001271;Isoform0001301;Isoform0001355;Isoform0001451;Isoform0001511;Isoform0001836;Isoform0002023;Isoform0002058;Isoform0002092;Isoform0002238;Isoform0002606;Isoform0002908;Isoform0003229;Isoform0003429;Isoform0003446;Isoform0003681;Isoform0003750;Isoform0003958;Isoform00…
GO:0009791	post-embryonic development	6	256	0.982903	1	Isoform0005787;Isoform0041030;Isoform0047692;Isoform0057738;Isoform0062997;Isoform0065467
GO:0007010	cytoskeleton organization	3	161	0.983182	1	Isoform0033826;Isoform0066004;Isoform0067574
GO:0006725	cellular aromatic compound metabolic process	108	2737	0.983341	1	Isoform0001511;Isoform0002023;Isoform0002058;Isoform0005488;Isoform0005631;Isoform0005907;Isoform0006426;Isoform0007274;Isoform0007492;Isoform0009095;Isoform0011083;Isoform0013131;Isoform0013891;Isoform0017532;Isoform0018637;Isoform0018888;Isoform0019179;Isoform0019267;Isoform0019470;Isoform0020090;Isoform0020833;Isoform0020933;Isoform0021464;Isoform0021782;Isoform0022794;Isoform0023112;Isoform00…
GO:1901135	carbohydrate derivative metabolic process	14	483	0.983481	1	Isoform0019470;Isoform0019488;Isoform0020833;Isoform0024087;Isoform0024888;Isoform0025453;Isoform0025611;Isoform0031746;Isoform0033689;Isoform0035295;Isoform0036653;Isoform0046792;Isoform0050227;Isoform0070622
GO:0009987	cellular process	576	12835	0.985178	1	Isoform0000062;Isoform0000695;Isoform0000890;Isoform0001130;Isoform0001242;Isoform0001433;Isoform0001511;Isoform0002023;Isoform0002058;Isoform0002092;Isoform0002238;Isoform0002371;Isoform0002409;Isoform0002438;Isoform0002456;Isoform0002481;Isoform0002603;Isoform0002606;Isoform0002698;Isoform0003300;Isoform0003319;Isoform0003429;Isoform0003564;Isoform0003665;Isoform0003681;Isoform0003958;Isoform00…
GO:0048856	anatomical structure development	22	702	0.986225	1	Isoform0001909;Isoform0003230;Isoform0005787;Isoform0017066;Isoform0018637;Isoform0029037;Isoform0041030;Isoform0042935;Isoform0044734;Isoform0046003;Isoform0047692;Isoform0048728;Isoform0049012;Isoform0057738;Isoform0059508;Isoform0062997;Isoform0065467;Isoform0066004;Isoform0067574;Isoform0068862;Isoform0070815;Isoform0071373
GO:0019318	hexose metabolic process	4	200	0.986262	1	Isoform0012309;Isoform0036757;Isoform0044560;Isoform0045627
GO:0006486	protein glycosylation	1	89	0.986468	1	Isoform0019488
GO:0009101	glycoprotein biosynthetic process	1	89	0.986468	1	Isoform0019488
GO:0043413	macromolecule glycosylation	1	89	0.986468	1	Isoform0019488
GO:0009308	amine metabolic process	1	91	0.987718	1	Isoform0042347
GO:0044267	cellular protein metabolic process	162	3989	0.987901	1	Isoform0000695;Isoform0002058;Isoform0002603;Isoform0004357;Isoform0004544;Isoform0004650;Isoform0005218;Isoform0006036;Isoform0006545;Isoform0006734;Isoform0007629;Isoform0008602;Isoform0008616;Isoform0009656;Isoform0010406;Isoform0010730;Isoform0012328;Isoform0013245;Isoform0013891;Isoform0014085;Isoform0014926;Isoform0015797;Isoform0017858;Isoform0018125;Isoform0018127;Isoform0018186;Isoform00…
GO:0006101	citrate metabolic process	1	92	0.988299	1	Isoform0054638
GO:0009100	glycoprotein metabolic process	1	92	0.988299	1	Isoform0019488
GO:0016049	cell growth	1	92	0.988299	1	Isoform0062997
GO:0072350	tricarboxylic acid metabolic process	1	92	0.988299	1	Isoform0054638
GO:0006073	cellular glucan metabolic process	18	605	0.988303	1	Isoform0001433;Isoform0005910;Isoform0006899;Isoform0020046;Isoform0025611;Isoform0026500;Isoform0028408;Isoform0043356;Isoform0044560;Isoform0044784;Isoform0045627;Isoform0048272;Isoform0049355;Isoform0057253;Isoform0059299;Isoform0060301;Isoform0069431;Isoform0072166
GO:0019637	organophosphate metabolic process	27	840	0.988645	1	Isoform0000890;Isoform0001511;Isoform0016167;Isoform0017532;Isoform0018637;Isoform0019470;Isoform0020833;Isoform0022686;Isoform0024087;Isoform0024888;Isoform0025453;Isoform0026108;Isoform0031457;Isoform0031746;Isoform0033689;Isoform0036653;Isoform0036940;Isoform0039682;Isoform0041184;Isoform0048728;Isoform0050227;Isoform0052130;Isoform0054118;Isoform0054791;Isoform0058388;Isoform0064592;Isoform00…
GO:0009639	response to red or far red light	2	135	0.98879	1	Isoform0066004;Isoform0067574
GO:0044264	cellular polysaccharide metabolic process	18	609	0.989303	1	Isoform0001433;Isoform0005910;Isoform0006899;Isoform0020046;Isoform0025611;Isoform0026500;Isoform0028408;Isoform0043356;Isoform0044560;Isoform0044784;Isoform0045627;Isoform0048272;Isoform0049355;Isoform0057253;Isoform0059299;Isoform0060301;Isoform0069431;Isoform0072166
GO:0034654	nucleobase-containing compound biosynthetic process	13	474	0.989407	1	Isoform0019470;Isoform0020833;Isoform0024087;Isoform0024888;Isoform0025453;Isoform0026108;Isoform0033689;Isoform0036653;Isoform0050227;Isoform0055512;Isoform0063778;Isoform0070622;Isoform0072520
GO:0048869	cellular developmental process	8	334	0.990123	1	Isoform0017066;Isoform0046003;Isoform0047692;Isoform0057738;Isoform0062997;Isoform0066004;Isoform0067574;Isoform0068862
GO:0006310	DNA recombination	1	97	0.990818	1	Isoform0046003
GO:0043603	cellular amide metabolic process	9	367	0.991091	1	Isoform0013891;Isoform0017647;Isoform0020709;Isoform0021464;Isoform0023257;Isoform0030783;Isoform0035295;Isoform0046792;Isoform0059315
GO:0006952	defense response	3	178	0.991204	1	Isoform0044734;Isoform0059508;Isoform0067858
GO:0032502	developmental process	36	1081	0.99125	1	Isoform0001909;Isoform0002606;Isoform0003230;Isoform0003681;Isoform0005787;Isoform0006348;Isoform0009604;Isoform0013696;Isoform0017066;Isoform0018637;Isoform0021975;Isoform0029037;Isoform0033826;Isoform0041030;Isoform0042347;Isoform0042933;Isoform0042935;Isoform0043120;Isoform0044734;Isoform0045196;Isoform0046003;Isoform0047692;Isoform0048728;Isoform0049012;Isoform0055512;Isoform0057738;Isoform00…
GO:0006644	phospholipid metabolic process	5	247	0.991669	1	Isoform0016167;Isoform0022686;Isoform0036940;Isoform0039682;Isoform0041184
GO:0034613	cellular protein localization	9	370	0.991823	1	Isoform0007274;Isoform0007492;Isoform0010240;Isoform0017066;Isoform0061110;Isoform0061250;Isoform0062036;Isoform0065467;Isoform0066147
GO:0070727	cellular macromolecule localization	9	370	0.991823	1	Isoform0007274;Isoform0007492;Isoform0010240;Isoform0017066;Isoform0061110;Isoform0061250;Isoform0062036;Isoform0065467;Isoform0066147
GO:0009126	purine nucleoside monophosphate metabolic process	1	100	0.992061	1	Isoform0070622
GO:0009127	purine nucleoside monophosphate biosynthetic process	1	100	0.992061	1	Isoform0070622
GO:0009167	purine ribonucleoside monophosphate metabolic process	1	100	0.992061	1	Isoform0070622
GO:0009168	purine ribonucleoside monophosphate biosynthetic process	1	100	0.992061	1	Isoform0070622
GO:0009617	response to bacterium	1	100	0.992061	1	Isoform0065467
GO:0048518	positive regulation of biological process	1	100	0.992061	1	Isoform0025611
GO:0044262	cellular carbohydrate metabolic process	25	810	0.9926	1	Isoform0001433;Isoform0005910;Isoform0006899;Isoform0016167;Isoform0020046;Isoform0022511;Isoform0025611;Isoform0026500;Isoform0028408;Isoform0039682;Isoform0043356;Isoform0044560;Isoform0044784;Isoform0045627;Isoform0047331;Isoform0048272;Isoform0049355;Isoform0051553;Isoform0055935;Isoform0057253;Isoform0059257;Isoform0059299;Isoform0060301;Isoform0069431;Isoform0072166
GO:0034660	ncRNA metabolic process	10	404	0.992862	1	Isoform0005907;Isoform0007274;Isoform0013891;Isoform0021464;Isoform0021782;Isoform0026779;Isoform0042347;Isoform0046040;Isoform0054893;Isoform0059315
GO:0006970	response to osmotic stress	3	185	0.993294	1	Isoform0040580;Isoform0044178;Isoform0053145
GO:0009698	phenylpropanoid metabolic process	3	185	0.993294	1	Isoform0033015;Isoform0045764;Isoform0047199
GO:0006090	pyruvate metabolic process	10	407	0.993438	1	Isoform0002092;Isoform0003429;Isoform0022097;Isoform0026553;Isoform0029405;Isoform0031547;Isoform0032292;Isoform0038658;Isoform0042889;Isoform0044178
GO:0006650	glycerophospholipid metabolic process	3	186	0.993551	1	Isoform0022686;Isoform0036940;Isoform0041184
GO:0044265	cellular macromolecule catabolic process	6	290	0.994224	1	Isoform0002058;Isoform0036757;Isoform0062699;Isoform0063293;Isoform0064597;Isoform0069043
GO:0048468	cell development	3	190	0.994484	1	Isoform0046003;Isoform0066004;Isoform0067574
GO:0044550	secondary metabolite biosynthetic process	3	191	0.994696	1	Isoform0033015;Isoform0045764;Isoform0047199
GO:0009152	purine ribonucleotide biosynthetic process	2	154	0.994999	1	Isoform0050227;Isoform0070622
GO:0009057	macromolecule catabolic process	8	357	0.995041	1	Isoform0002058;Isoform0022440;Isoform0036757;Isoform0045786;Isoform0062699;Isoform0063293;Isoform0064597;Isoform0069043
GO:0046486	glycerolipid metabolic process	3	194	0.995286	1	Isoform0022686;Isoform0036940;Isoform0041184
GO:1902580	single-organism cellular localization	2	156	0.99541	1	Isoform0007492;Isoform0065467
GO:0030154	cell differentiation	4	231	0.995507	1	Isoform0046003;Isoform0062997;Isoform0066004;Isoform0067574
GO:0006164	purine nucleotide biosynthetic process	2	157	0.995603	1	Isoform0050227;Isoform0070622
GO:0009108	coenzyme biosynthetic process	1	114	0.995975	1	Isoform0026108
GO:0005996	monosaccharide metabolic process	5	270	0.996236	1	Isoform0012309;Isoform0036757;Isoform0044560;Isoform0045627;Isoform0055395
GO:0006399	tRNA metabolic process	4	236	0.996266	1	Isoform0013891;Isoform0021464;Isoform0042347;Isoform0059315
GO:0044707	single-multicellular organism process	23	790	0.996328	1	Isoform0005787;Isoform0006348;Isoform0009604;Isoform0013696;Isoform0018637;Isoform0029037;Isoform0041030;Isoform0042347;Isoform0042933;Isoform0042935;Isoform0044734;Isoform0046003;Isoform0047692;Isoform0048728;Isoform0049012;Isoform0057738;Isoform0059508;Isoform0062997;Isoform0065467;Isoform0066004;Isoform0067574;Isoform0070815;Isoform0071373
GO:0061024	membrane organization	2	162	0.996454	1	Isoform0009599;Isoform0017066
GO:0032501	multicellular organismal process	23	792	0.996489	1	Isoform0005787;Isoform0006348;Isoform0009604;Isoform0013696;Isoform0018637;Isoform0029037;Isoform0041030;Isoform0042347;Isoform0042933;Isoform0042935;Isoform0044734;Isoform0046003;Isoform0047692;Isoform0048728;Isoform0049012;Isoform0057738;Isoform0059508;Isoform0062997;Isoform0065467;Isoform0066004;Isoform0067574;Isoform0070815;Isoform0071373
GO:0009755	hormone-mediated signaling pathway	8	370	0.99668	1	Isoform0010994;Isoform0027442;Isoform0049940;Isoform0051187;Isoform0060436;Isoform0060867;Isoform0064311;Isoform0065467
GO:0032870	cellular response to hormone stimulus	8	370	0.99668	1	Isoform0010994;Isoform0027442;Isoform0049940;Isoform0051187;Isoform0060436;Isoform0060867;Isoform0064311;Isoform0065467
GO:0071495	cellular response to endogenous stimulus	8	370	0.99668	1	Isoform0010994;Isoform0027442;Isoform0049940;Isoform0051187;Isoform0060436;Isoform0060867;Isoform0064311;Isoform0065467
GO:0009150	purine ribonucleotide metabolic process	2	168	0.997264	1	Isoform0050227;Isoform0070622
GO:0033554	cellular response to stress	5	280	0.997357	1	Isoform0002058;Isoform0046003;Isoform0065467;Isoform0068097;Isoform0068558
GO:0015992	proton transport	2	169	0.99738	1	Isoform0040580;Isoform0053145
GO:0006412	translation	3	210	0.997503	1	Isoform0013891;Isoform0021464;Isoform0059315
GO:0040007	growth	3	210	0.997503	1	Isoform0017066;Isoform0062997;Isoform0065467
GO:0043269	regulation of ion transport	1	124	0.997523	1	Isoform0065467
GO:0006779	porphyrin-containing compound biosynthetic process	1	128	0.99796	1	Isoform0006426
GO:0032879	regulation of localization	1	128	0.99796	1	Isoform0065467
GO:0033014	tetrapyrrole biosynthetic process	1	128	0.99796	1	Isoform0006426
GO:0051049	regulation of transport	1	128	0.99796	1	Isoform0065467
GO:0009156	ribonucleoside monophosphate biosynthetic process	1	130	0.998149	1	Isoform0070622
GO:0009161	ribonucleoside monophosphate metabolic process	1	130	0.998149	1	Isoform0070622
GO:0006778	porphyrin-containing compound metabolic process	2	178	0.998229	1	Isoform0006426;Isoform0007492
GO:0033013	tetrapyrrole metabolic process	2	179	0.998304	1	Isoform0006426;Isoform0007492
GO:0043043	peptide biosynthetic process	3	220	0.99833	1	Isoform0013891;Isoform0021464;Isoform0059315
GO:0015672	monovalent inorganic cation transport	2	180	0.998377	1	Isoform0040580;Isoform0053145
GO:0006508	proteolysis	7	361	0.998402	1	Isoform0002058;Isoform0036757;Isoform0062699;Isoform0062997;Isoform0063293;Isoform0064597;Isoform0069043
GO:0006006	glucose metabolic process	1	134	0.998476	1	Isoform0036757
GO:0006163	purine nucleotide metabolic process	2	182	0.998512	1	Isoform0050227;Isoform0070622
GO:0006790	sulfur compound metabolic process	7	365	0.998602	1	Isoform0002023;Isoform0005003;Isoform0011083;Isoform0014778;Isoform0018637;Isoform0048728;Isoform0068862
GO:0006468	protein phosphorylation	1	136	0.998617	1	Isoform0065467
GO:0006796	phosphate-containing compound metabolic process	97	2677	0.998677	1	Isoform0000695;Isoform0000890;Isoform0001511;Isoform0002092;Isoform0004357;Isoform0004544;Isoform0005218;Isoform0006036;Isoform0007629;Isoform0010730;Isoform0015797;Isoform0016167;Isoform0017532;Isoform0018125;Isoform0018577;Isoform0018637;Isoform0018756;Isoform0019470;Isoform0019737;Isoform0020833;Isoform0021871;Isoform0022097;Isoform0022686;Isoform0024087;Isoform0024241;Isoform0024888;Isoform00…
GO:0006793	phosphorus metabolic process	99	2725	0.99869	1	Isoform0000695;Isoform0000890;Isoform0001511;Isoform0002092;Isoform0004357;Isoform0004544;Isoform0005003;Isoform0005218;Isoform0006036;Isoform0007629;Isoform0010730;Isoform0014778;Isoform0015797;Isoform0016167;Isoform0017532;Isoform0018125;Isoform0018577;Isoform0018637;Isoform0018756;Isoform0019470;Isoform0019737;Isoform0020833;Isoform0021871;Isoform0022097;Isoform0022686;Isoform0024087;Isoform00…
GO:1901575	organic substance catabolic process	11	493	0.998715	1	Isoform0002058;Isoform0007492;Isoform0022440;Isoform0033417;Isoform0036757;Isoform0045786;Isoform0062699;Isoform0063293;Isoform0064597;Isoform0065467;Isoform0069043
GO:0044767	single-organism developmental process	24	865	0.998783	1	Isoform0005787;Isoform0006348;Isoform0009604;Isoform0013696;Isoform0017066;Isoform0018637;Isoform0029037;Isoform0041030;Isoform0042347;Isoform0042935;Isoform0044734;Isoform0046003;Isoform0047692;Isoform0048728;Isoform0049012;Isoform0057738;Isoform0059508;Isoform0062997;Isoform0065467;Isoform0066004;Isoform0067574;Isoform0068862;Isoform0070815;Isoform0071373
GO:0006605	protein targeting	3	231	0.998932	1	Isoform0007492;Isoform0017066;Isoform0065467
GO:0009123	nucleoside monophosphate metabolic process	1	143	0.999016	1	Isoform0070622
GO:0009124	nucleoside monophosphate biosynthetic process	1	143	0.999016	1	Isoform0070622
GO:0008652	cellular amino acid biosynthetic process	5	308	0.99904	1	Isoform0017647;Isoform0020709;Isoform0023257;Isoform0030783;Isoform0068862
GO:0007154	cell communication	26	934	0.999138	1	Isoform0005853;Isoform0007413;Isoform0010994;Isoform0017066;Isoform0024185;Isoform0025625;Isoform0027442;Isoform0028977;Isoform0033230;Isoform0041030;Isoform0044734;Isoform0049940;Isoform0050379;Isoform0051187;Isoform0052584;Isoform0057045;Isoform0059508;Isoform0060436;Isoform0060867;Isoform0064311;Isoform0065467;Isoform0066004;Isoform0067336;Isoform0067574;Isoform0067656;Isoform0067858
GO:0070838	divalent metal ion transport	1	146	0.999149	1	Isoform0034156
GO:0072511	divalent inorganic cation transport	1	146	0.999149	1	Isoform0034156
GO:0007165	signal transduction	23	854	0.999178	1	Isoform0005853;Isoform0007413;Isoform0010994;Isoform0017066;Isoform0024185;Isoform0025625;Isoform0027442;Isoform0028977;Isoform0033230;Isoform0041030;Isoform0049940;Isoform0050379;Isoform0051187;Isoform0052584;Isoform0057045;Isoform0060436;Isoform0060867;Isoform0064311;Isoform0065467;Isoform0066004;Isoform0067336;Isoform0067574;Isoform0067656
GO:0023052	signaling	23	855	0.999198	1	Isoform0005853;Isoform0007413;Isoform0010994;Isoform0017066;Isoform0024185;Isoform0025625;Isoform0027442;Isoform0028977;Isoform0033230;Isoform0041030;Isoform0049940;Isoform0050379;Isoform0051187;Isoform0052584;Isoform0057045;Isoform0060436;Isoform0060867;Isoform0064311;Isoform0065467;Isoform0066004;Isoform0067336;Isoform0067574;Isoform0067656
GO:0044700	single organism signaling	23	855	0.999198	1	Isoform0005853;Isoform0007413;Isoform0010994;Isoform0017066;Isoform0024185;Isoform0025625;Isoform0027442;Isoform0028977;Isoform0033230;Isoform0041030;Isoform0049940;Isoform0050379;Isoform0051187;Isoform0052584;Isoform0057045;Isoform0060436;Isoform0060867;Isoform0064311;Isoform0065467;Isoform0066004;Isoform0067336;Isoform0067574;Isoform0067656
GO:0018130	heterocycle biosynthetic process	16	658	0.999209	1	Isoform0002023;Isoform0006426;Isoform0011083;Isoform0019470;Isoform0020833;Isoform0024087;Isoform0024888;Isoform0025453;Isoform0026108;Isoform0033689;Isoform0036653;Isoform0050227;Isoform0055512;Isoform0063778;Isoform0070622;Isoform0072520
GO:0006518	peptide metabolic process	3	239	0.99923	1	Isoform0013891;Isoform0021464;Isoform0059315
GO:0000097	sulfur amino acid biosynthetic process	1	155	0.999451	1	Isoform0068862
GO:0044248	cellular catabolic process	9	459	0.999467	1	Isoform0002058;Isoform0007492;Isoform0033417;Isoform0036757;Isoform0062699;Isoform0063293;Isoform0064597;Isoform0065467;Isoform0069043
GO:0015031	protein transport	16	674	0.999491	1	Isoform0007274;Isoform0007492;Isoform0009599;Isoform0010240;Isoform0017066;Isoform0035021;Isoform0043987;Isoform0048425;Isoform0049380;Isoform0058366;Isoform0060245;Isoform0061110;Isoform0061250;Isoform0062036;Isoform0065467;Isoform0066147
GO:0009056	catabolic process	11	532	0.999608	1	Isoform0002058;Isoform0007492;Isoform0022440;Isoform0033417;Isoform0036757;Isoform0045786;Isoform0062699;Isoform0063293;Isoform0064597;Isoform0065467;Isoform0069043
GO:0000096	sulfur amino acid metabolic process	1	163	0.999628	1	Isoform0068862
GO:0030243	cellulose metabolic process	6	374	0.999688	1	Isoform0001433;Isoform0005910;Isoform0048272;Isoform0049355;Isoform0059299;Isoform0060301
GO:0032446	protein modification by small protein conjugation	4	301	0.999693	1	Isoform0027953;Isoform0063293;Isoform0066004;Isoform0067574
GO:0045184	establishment of protein localization	16	693	0.999702	1	Isoform0007274;Isoform0007492;Isoform0009599;Isoform0010240;Isoform0017066;Isoform0035021;Isoform0043987;Isoform0048425;Isoform0049380;Isoform0058366;Isoform0060245;Isoform0061110;Isoform0061250;Isoform0062036;Isoform0065467;Isoform0066147
GO:0016482	cytoplasmic transport	3	265	0.999738	1	Isoform0007492;Isoform0017066;Isoform0065467
GO:0051716	cellular response to stimulus	33	1183	0.999785	1	Isoform0002058;Isoform0005853;Isoform0007413;Isoform0010994;Isoform0017066;Isoform0024185;Isoform0025625;Isoform0027442;Isoform0028977;Isoform0033230;Isoform0041030;Isoform0044734;Isoform0046003;Isoform0049420;Isoform0049940;Isoform0049997;Isoform0050379;Isoform0051187;Isoform0052584;Isoform0056152;Isoform0057045;Isoform0059508;Isoform0060436;Isoform0060867;Isoform0064311;Isoform0065467;Isoform00…
GO:0051704	multi-organism process	3	270	0.999788	1	Isoform0047692;Isoform0057738;Isoform0065467
GO:0006807	nitrogen compound metabolic process	116	3252	0.999802	1	Isoform0001511;Isoform0002023;Isoform0002058;Isoform0005488;Isoform0005631;Isoform0005907;Isoform0006426;Isoform0007274;Isoform0007492;Isoform0009095;Isoform0011083;Isoform0013131;Isoform0013891;Isoform0017532;Isoform0017647;Isoform0018637;Isoform0018888;Isoform0019179;Isoform0019267;Isoform0019470;Isoform0020090;Isoform0020709;Isoform0020833;Isoform0020933;Isoform0021464;Isoform0021782;Isoform00…
GO:0006818	hydrogen transport	2	228	0.999806	1	Isoform0040580;Isoform0053145
GO:0019748	secondary metabolic process	3	275	0.999828	1	Isoform0033015;Isoform0045764;Isoform0047199
GO:0051188	cofactor biosynthetic process	2	248	0.999921	1	Isoform0006426;Isoform0026108
GO:0070647	protein modification by small protein conjugation or removal	4	335	0.999921	1	Isoform0027953;Isoform0063293;Isoform0066004;Isoform0067574
GO:0019438	aromatic compound biosynthetic process	17	771	0.999926	1	Isoform0006426;Isoform0019470;Isoform0020833;Isoform0024087;Isoform0024888;Isoform0025453;Isoform0026108;Isoform0033015;Isoform0033689;Isoform0036653;Isoform0045764;Isoform0047199;Isoform0050227;Isoform0055512;Isoform0063778;Isoform0070622;Isoform0072520
GO:0051273	beta-glucan metabolic process	7	452	0.999934	1	Isoform0001433;Isoform0005910;Isoform0048272;Isoform0049355;Isoform0059299;Isoform0060301;Isoform0072166
GO:0044271	cellular nitrogen compound biosynthetic process	22	927	0.999941	1	Isoform0006426;Isoform0013891;Isoform0017647;Isoform0019470;Isoform0020709;Isoform0020833;Isoform0021464;Isoform0023257;Isoform0024087;Isoform0024888;Isoform0025453;Isoform0026108;Isoform0030783;Isoform0033689;Isoform0036653;Isoform0042347;Isoform0050227;Isoform0055512;Isoform0059315;Isoform0063778;Isoform0070622;Isoform0072520
GO:0006811	ion transport	21	905	0.999952	1	Isoform0005787;Isoform0007684;Isoform0023796;Isoform0024388;Isoform0030286;Isoform0034156;Isoform0035461;Isoform0040580;Isoform0043419;Isoform0045585;Isoform0046255;Isoform0046433;Isoform0047138;Isoform0053145;Isoform0054727;Isoform0058818;Isoform0062258;Isoform0062510;Isoform0065674;Isoform0065738;Isoform0070102
GO:0043207	response to external biotic stimulus	1	218	0.999975	1	Isoform0065467
GO:0051707	response to other organism	1	218	0.999975	1	Isoform0065467
GO:0009607	response to biotic stimulus	1	220	0.999977	1	Isoform0065467
GO:0044283	small molecule biosynthetic process	12	653	0.999978	1	Isoform0000890;Isoform0006869;Isoform0010365;Isoform0017647;Isoform0020709;Isoform0023257;Isoform0030783;Isoform0031457;Isoform0047217;Isoform0048324;Isoform0054118;Isoform0068862
GO:0044281	small molecule metabolic process	91	2779	0.999979	1	Isoform0000890;Isoform0001511;Isoform0002023;Isoform0002092;Isoform0002238;Isoform0003429;Isoform0003958;Isoform0004280;Isoform0005003;Isoform0005557;Isoform0005729;Isoform0005771;Isoform0006869;Isoform0007492;Isoform0010365;Isoform0011083;Isoform0012309;Isoform0013131;Isoform0013891;Isoform0014778;Isoform0016167;Isoform0017532;Isoform0017647;Isoform0018637;Isoform0019470;Isoform0019694;Isoform00…
GO:0019752	carboxylic acid metabolic process	59	1976	0.99998	1	Isoform0002092;Isoform0002238;Isoform0003429;Isoform0003958;Isoform0004280;Isoform0005003;Isoform0005557;Isoform0005729;Isoform0005771;Isoform0007492;Isoform0013891;Isoform0014778;Isoform0017647;Isoform0019470;Isoform0019694;Isoform0020709;Isoform0020833;Isoform0021347;Isoform0021464;Isoform0022097;Isoform0022243;Isoform0023257;Isoform0023585;Isoform0024087;Isoform0024888;Isoform0025453;Isoform00…
GO:0016192	vesicle-mediated transport	2	279	0.999981	1	Isoform0017066;Isoform0041030
GO:1901362	organic cyclic compound biosynthetic process	18	849	0.999982	1	Isoform0006426;Isoform0019470;Isoform0020833;Isoform0024087;Isoform0024888;Isoform0025453;Isoform0026108;Isoform0033015;Isoform0033689;Isoform0036653;Isoform0042933;Isoform0045764;Isoform0047199;Isoform0050227;Isoform0055512;Isoform0063778;Isoform0070622;Isoform0072520
GO:0006633	fatty acid biosynthetic process	2	282	0.999983	1	Isoform0047217;Isoform0048324
GO:0072330	monocarboxylic acid biosynthetic process	2	284	0.999985	1	Isoform0047217;Isoform0048324
GO:0006520	cellular amino acid metabolic process	19	888	0.999986	1	Isoform0007492;Isoform0013891;Isoform0017647;Isoform0019470;Isoform0020709;Isoform0020833;Isoform0021464;Isoform0023257;Isoform0024087;Isoform0024888;Isoform0025453;Isoform0030783;Isoform0033015;Isoform0033689;Isoform0036653;Isoform0045764;Isoform0047199;Isoform0059315;Isoform0068862
GO:1901566	organonitrogen compound biosynthetic process	23	1008	0.999986	1	Isoform0006426;Isoform0013891;Isoform0017647;Isoform0019470;Isoform0020709;Isoform0020833;Isoform0021464;Isoform0023257;Isoform0024087;Isoform0024888;Isoform0025453;Isoform0026108;Isoform0030783;Isoform0033689;Isoform0036653;Isoform0042347;Isoform0050227;Isoform0055512;Isoform0059315;Isoform0063778;Isoform0068862;Isoform0070622;Isoform0072520
GO:0044272	sulfur compound biosynthetic process	1	238	0.99999	1	Isoform0068862
GO:0043436	oxoacid metabolic process	59	2011	0.999991	1	Isoform0002092;Isoform0002238;Isoform0003429;Isoform0003958;Isoform0004280;Isoform0005003;Isoform0005557;Isoform0005729;Isoform0005771;Isoform0007492;Isoform0013891;Isoform0014778;Isoform0017647;Isoform0019470;Isoform0019694;Isoform0020709;Isoform0020833;Isoform0021347;Isoform0021464;Isoform0022097;Isoform0022243;Isoform0023257;Isoform0023585;Isoform0024087;Isoform0024888;Isoform0025453;Isoform00…
GO:0046907	intracellular transport	9	577	0.999991	1	Isoform0007274;Isoform0007492;Isoform0010240;Isoform0017066;Isoform0061110;Isoform0061250;Isoform0062036;Isoform0065467;Isoform0066147
GO:0006082	organic acid metabolic process	59	2012	0.999991	1	Isoform0002092;Isoform0002238;Isoform0003429;Isoform0003958;Isoform0004280;Isoform0005003;Isoform0005557;Isoform0005729;Isoform0005771;Isoform0007492;Isoform0013891;Isoform0014778;Isoform0017647;Isoform0019470;Isoform0019694;Isoform0020709;Isoform0020833;Isoform0021347;Isoform0021464;Isoform0022097;Isoform0022243;Isoform0023257;Isoform0023585;Isoform0024087;Isoform0024888;Isoform0025453;Isoform00…
GO:1902582	single-organism intracellular transport	3	347	0.999992	1	Isoform0007492;Isoform0017066;Isoform0065467
GO:1901576	organic substance biosynthetic process	97	2980	0.999992	1	Isoform0000890;Isoform0002371;Isoform0002438;Isoform0003319;Isoform0005631;Isoform0006376;Isoform0006426;Isoform0006869;Isoform0007476;Isoform0007811;Isoform0010365;Isoform0011447;Isoform0012416;Isoform0013041;Isoform0013055;Isoform0013574;Isoform0013891;Isoform0014095;Isoform0015932;Isoform0016585;Isoform0016868;Isoform0017598;Isoform0017647;Isoform0018194;Isoform0018637;Isoform0019470;Isoform00…
GO:0009628	response to abiotic stimulus	10	617	0.999992	1	Isoform0040580;Isoform0044178;Isoform0044784;Isoform0047692;Isoform0053145;Isoform0057738;Isoform0065467;Isoform0066004;Isoform0067574;Isoform0069431
GO:0051649	establishment of localization in cell	9	588	0.999994	1	Isoform0007274;Isoform0007492;Isoform0010240;Isoform0017066;Isoform0061110;Isoform0061250;Isoform0062036;Isoform0065467;Isoform0066147
GO:0051641	cellular localization	10	627	0.999995	1	Isoform0007274;Isoform0007492;Isoform0010240;Isoform0017066;Isoform0050446;Isoform0061110;Isoform0061250;Isoform0062036;Isoform0065467;Isoform0066147
GO:0010467	gene expression	29	1229	0.999996	1	Isoform0005907;Isoform0009095;Isoform0011447;Isoform0013891;Isoform0014095;Isoform0014190;Isoform0016868;Isoform0019179;Isoform0021464;Isoform0021782;Isoform0025892;Isoform0026779;Isoform0027567;Isoform0028162;Isoform0040696;Isoform0044734;Isoform0046040;Isoform0049420;Isoform0049997;Isoform0052546;Isoform0052770;Isoform0054893;Isoform0056152;Isoform0059315;Isoform0059508;Isoform0063637;Isoform00…
GO:0071705	nitrogen compound transport	1	259	0.999997	1	Isoform0016176
GO:0044237	cellular metabolic process	416	10224	0.999998	1	Isoform0000695;Isoform0000890;Isoform0001433;Isoform0001511;Isoform0002023;Isoform0002058;Isoform0002092;Isoform0002238;Isoform0002371;Isoform0002438;Isoform0002603;Isoform0003319;Isoform0003429;Isoform0003958;Isoform0004280;Isoform0004357;Isoform0004544;Isoform0004650;Isoform0005003;Isoform0005139;Isoform0005218;Isoform0005488;Isoform0005557;Isoform0005631;Isoform0005729;Isoform0005771;Isoform00…
GO:0044711	single-organism biosynthetic process	31	1324	0.999999	1	Isoform0000890;Isoform0006869;Isoform0010365;Isoform0017647;Isoform0019470;Isoform0020709;Isoform0020833;Isoform0023257;Isoform0024087;Isoform0024888;Isoform0025453;Isoform0025611;Isoform0026108;Isoform0030783;Isoform0031457;Isoform0033015;Isoform0033689;Isoform0036653;Isoform0042933;Isoform0045764;Isoform0046003;Isoform0047199;Isoform0047217;Isoform0048324;Isoform0050227;Isoform0054118;Isoform00…
GO:0009058	biosynthetic process	100	3144	0.999999	1	Isoform0000890;Isoform0002023;Isoform0002371;Isoform0002438;Isoform0003319;Isoform0005631;Isoform0006376;Isoform0006426;Isoform0006869;Isoform0007476;Isoform0007811;Isoform0010365;Isoform0011083;Isoform0011447;Isoform0012416;Isoform0013041;Isoform0013055;Isoform0013574;Isoform0013891;Isoform0014095;Isoform0015932;Isoform0016585;Isoform0016868;Isoform0017598;Isoform0017647;Isoform0018194;Isoform00…
GO:0008104	protein localization	17	902	0.999999	1	Isoform0007274;Isoform0007492;Isoform0009599;Isoform0010240;Isoform0017066;Isoform0035021;Isoform0043987;Isoform0045332;Isoform0048425;Isoform0049380;Isoform0058366;Isoform0060245;Isoform0061110;Isoform0061250;Isoform0062036;Isoform0065467;Isoform0066147
GO:0016070	RNA metabolic process	23	1093	0.999999	1	Isoform0005907;Isoform0007274;Isoform0009095;Isoform0013891;Isoform0019179;Isoform0021464;Isoform0021782;Isoform0026779;Isoform0028162;Isoform0042347;Isoform0044734;Isoform0046040;Isoform0049420;Isoform0049997;Isoform0052546;Isoform0054893;Isoform0056152;Isoform0059315;Isoform0059508;Isoform0063637;Isoform0067858;Isoform0070576;Isoform0071738
GO:0009416	response to light stimulus	2	341	0.999999	1	Isoform0066004;Isoform0067574
GO:0033036	macromolecule localization	18	963	1	1	Isoform0007274;Isoform0007492;Isoform0009599;Isoform0009865;Isoform0010240;Isoform0017066;Isoform0035021;Isoform0043987;Isoform0045332;Isoform0048425;Isoform0049380;Isoform0058366;Isoform0060245;Isoform0061110;Isoform0061250;Isoform0062036;Isoform0065467;Isoform0066147
GO:0044249	cellular biosynthetic process	93	3016	1	1	Isoform0002023;Isoform0002371;Isoform0002438;Isoform0003319;Isoform0005631;Isoform0006376;Isoform0006426;Isoform0007476;Isoform0007811;Isoform0011083;Isoform0011447;Isoform0012416;Isoform0013041;Isoform0013055;Isoform0013574;Isoform0013891;Isoform0014095;Isoform0015932;Isoform0016585;Isoform0016868;Isoform0017598;Isoform0017647;Isoform0018194;Isoform0018637;Isoform0019470;Isoform0019488;Isoform00…
GO:0009314	response to radiation	2	362	1	1	Isoform0066004;Isoform0067574
GO:0016053	organic acid biosynthetic process	7	585	1	1	Isoform0017647;Isoform0020709;Isoform0023257;Isoform0030783;Isoform0047217;Isoform0048324;Isoform0068862
GO:0046394	carboxylic acid biosynthetic process	7	585	1	1	Isoform0017647;Isoform0020709;Isoform0023257;Isoform0030783;Isoform0047217;Isoform0048324;Isoform0068862
GO:0071702	organic substance transport	19	1019	1	1	Isoform0007274;Isoform0007492;Isoform0009599;Isoform0009865;Isoform0010240;Isoform0016176;Isoform0017066;Isoform0022511;Isoform0035021;Isoform0043987;Isoform0048425;Isoform0049380;Isoform0058366;Isoform0060245;Isoform0061110;Isoform0061250;Isoform0062036;Isoform0065467;Isoform0066147
GO:0008610	lipid biosynthetic process	4	476	1	1	Isoform0025611;Isoform0042933;Isoform0047217;Isoform0048324
GO:0009605	response to external stimulus	2	406	1	1	Isoform0065467;Isoform0068862
GO:0044765	single-organism transport	37	1629	1	1	Isoform0000353;Isoform0001294;Isoform0002238;Isoform0005787;Isoform0007492;Isoform0007684;Isoform0009865;Isoform0016176;Isoform0017066;Isoform0022511;Isoform0023796;Isoform0024388;Isoform0028326;Isoform0029840;Isoform0030286;Isoform0034156;Isoform0035461;Isoform0038628;Isoform0040580;Isoform0043419;Isoform0044178;Isoform0045585;Isoform0046255;Isoform0046433;Isoform0047138;Isoform0050379;Isoform00…
GO:1902578	single-organism localization	37	1660	1	1	Isoform0000353;Isoform0001294;Isoform0002238;Isoform0005787;Isoform0007492;Isoform0007684;Isoform0009865;Isoform0016176;Isoform0017066;Isoform0022511;Isoform0023796;Isoform0024388;Isoform0028326;Isoform0029840;Isoform0030286;Isoform0034156;Isoform0035461;Isoform0038628;Isoform0040580;Isoform0043419;Isoform0044178;Isoform0045585;Isoform0046255;Isoform0046433;Isoform0047138;Isoform0050379;Isoform00…
GO:1901564	organonitrogen compound metabolic process	38	1735	1	1	Isoform0001511;Isoform0002023;Isoform0006426;Isoform0007492;Isoform0011083;Isoform0013891;Isoform0017532;Isoform0017647;Isoform0019470;Isoform0020709;Isoform0020833;Isoform0021464;Isoform0023257;Isoform0023609;Isoform0024087;Isoform0024888;Isoform0025453;Isoform0026108;Isoform0030783;Isoform0033015;Isoform0033417;Isoform0033689;Isoform0035295;Isoform0036653;Isoform0042347;Isoform0045764;Isoform00…
GO:0006810	transport	51	2409	1	1	Isoform0000353;Isoform0001294;Isoform0002238;Isoform0005787;Isoform0007274;Isoform0007492;Isoform0007684;Isoform0009599;Isoform0009865;Isoform0010240;Isoform0016176;Isoform0017066;Isoform0022511;Isoform0023796;Isoform0024388;Isoform0028326;Isoform0029840;Isoform0030286;Isoform0034156;Isoform0035021;Isoform0035461;Isoform0038628;Isoform0040580;Isoform0041030;Isoform0043419;Isoform0043987;Isoform00…
GO:0051234	establishment of localization	67	3019	1	1	Isoform0000353;Isoform0000782;Isoform0001294;Isoform0002238;Isoform0005578;Isoform0005787;Isoform0006738;Isoform0007274;Isoform0007492;Isoform0007684;Isoform0009599;Isoform0009865;Isoform0010240;Isoform0016176;Isoform0017066;Isoform0017207;Isoform0018228;Isoform0019246;Isoform0021819;Isoform0022511;Isoform0023796;Isoform0024310;Isoform0024388;Isoform0028326;Isoform0029840;Isoform0030286;Isoform00…
GO:0051179	localization	70	3129	1	1	Isoform0000353;Isoform0000782;Isoform0001294;Isoform0002238;Isoform0005578;Isoform0005787;Isoform0006738;Isoform0007274;Isoform0007492;Isoform0007684;Isoform0009599;Isoform0009865;Isoform0010240;Isoform0016176;Isoform0017066;Isoform0017207;Isoform0018228;Isoform0019246;Isoform0021819;Isoform0022511;Isoform0023796;Isoform0024310;Isoform0024388;Isoform0028326;Isoform0029840;Isoform0030286;Isoform00…

## Sheet: C2-VS-D2_down.P
GO ID	Description	GeneRatio (921)	BgRatio (18330)	pvalue	p.adjust	geneID
GO:0030243	cellulose metabolic process	51	374	8.08e-11	5.29e-08	Isoform0002490;Isoform0002950;Isoform0005765;Isoform0010874;Isoform0011313;Isoform0011976;Isoform0013312;Isoform0013554;Isoform0013766;Isoform0013978;Isoform0018953;Isoform0021823;Isoform0024184;Isoform0028773;Isoform0028808;Isoform0029363;Isoform0033700;Isoform0035315;Isoform0035536;Isoform0035653;Isoform0036966;Isoform0039527;Isoform0044557;Isoform0045768;Isoform0045896;Isoform0047428;Isoform00…
GO:0015698	inorganic anion transport	29	159	1.37e-09	4.49e-07	Isoform0000806;Isoform0001439;Isoform0006991;Isoform0009295;Isoform0019434;Isoform0019566;Isoform0020527;Isoform0021102;Isoform0022001;Isoform0023722;Isoform0025647;Isoform0028139;Isoform0028593;Isoform0028771;Isoform0028982;Isoform0032479;Isoform0036120;Isoform0036929;Isoform0038038;Isoform0038715;Isoform0039113;Isoform0040950;Isoform0042049;Isoform0042229;Isoform0042473;Isoform0045862;Isoform00…
GO:0051273	beta-glucan metabolic process	53	452	8.26e-09	1.8e-06	Isoform0002490;Isoform0002950;Isoform0005765;Isoform0010874;Isoform0011313;Isoform0011976;Isoform0013312;Isoform0013554;Isoform0013766;Isoform0013978;Isoform0018953;Isoform0021823;Isoform0024184;Isoform0028773;Isoform0028808;Isoform0029363;Isoform0033700;Isoform0035315;Isoform0035536;Isoform0035653;Isoform0036966;Isoform0039527;Isoform0044557;Isoform0045768;Isoform0045896;Isoform0047428;Isoform00…
GO:0010646	regulation of cell communication	25	137	1.84e-08	3.01e-06	Isoform0003956;Isoform0008021;Isoform0009475;Isoform0012895;Isoform0012915;Isoform0014147;Isoform0014766;Isoform0016968;Isoform0018543;Isoform0018813;Isoform0019635;Isoform0020369;Isoform0020426;Isoform0029854;Isoform0030273;Isoform0038857;Isoform0039103;Isoform0040968;Isoform0041407;Isoform0042899;Isoform0043297;Isoform0043437;Isoform0054248;Isoform0056527;Isoform0057546
GO:0009808	lignin metabolic process	12	33	3.21e-08	4.21e-06	Isoform0020854;Isoform0021840;Isoform0026297;Isoform0026429;Isoform0032770;Isoform0038188;Isoform0040846;Isoform0042117;Isoform0045132;Isoform0045962;Isoform0046199;Isoform0046767
GO:0042546	cell wall biogenesis	11	31	1.63e-07	1.78e-05	Isoform0006115;Isoform0013312;Isoform0022275;Isoform0026925;Isoform0035536;Isoform0037609;Isoform0041694;Isoform0047428;Isoform0047700;Isoform0051471;Isoform0058793
GO:0010115	regulation of abscisic acid biosynthetic process	6	9	1.17e-06	6.95e-05	Isoform0013312;Isoform0035536;Isoform0047428;Isoform0047700;Isoform0051471;Isoform0058793
GO:0019216	regulation of lipid metabolic process	6	9	1.17e-06	6.95e-05	Isoform0013312;Isoform0035536;Isoform0047428;Isoform0047700;Isoform0051471;Isoform0058793
GO:0019747	regulation of isoprenoid metabolic process	6	9	1.17e-06	6.95e-05	Isoform0013312;Isoform0035536;Isoform0047428;Isoform0047700;Isoform0051471;Isoform0058793
GO:0043455	regulation of secondary metabolic process	6	9	1.17e-06	6.95e-05	Isoform0013312;Isoform0035536;Isoform0047428;Isoform0047700;Isoform0051471;Isoform0058793
GO:0046890	regulation of lipid biosynthetic process	6	9	1.17e-06	6.95e-05	Isoform0013312;Isoform0035536;Isoform0047428;Isoform0047700;Isoform0051471;Isoform0058793
GO:1902930	regulation of alcohol biosynthetic process	6	10	2.79e-06	0.000152491	Isoform0013312;Isoform0035536;Isoform0047428;Isoform0047700;Isoform0051471;Isoform0058793
GO:0006820	anion transport	31	256	5.38e-06	0.000255901	Isoform0000806;Isoform0001439;Isoform0003364;Isoform0006991;Isoform0009295;Isoform0013681;Isoform0019434;Isoform0019566;Isoform0020527;Isoform0021102;Isoform0022001;Isoform0023722;Isoform0025647;Isoform0028139;Isoform0028593;Isoform0028771;Isoform0028982;Isoform0032479;Isoform0036120;Isoform0036929;Isoform0038038;Isoform0038715;Isoform0039113;Isoform0040950;Isoform0042049;Isoform0042229;Isoform00…
GO:0005976	polysaccharide metabolic process	67	761	5.47e-06	0.000255901	Isoform0001632;Isoform0002490;Isoform0002950;Isoform0004483;Isoform0005765;Isoform0006115;Isoform0006160;Isoform0010874;Isoform0011313;Isoform0011976;Isoform0012018;Isoform0013298;Isoform0013312;Isoform0013554;Isoform0013766;Isoform0013978;Isoform0017966;Isoform0018953;Isoform0021823;Isoform0022275;Isoform0024184;Isoform0026925;Isoform0028773;Isoform0028808;Isoform0029363;Isoform0033700;Isoform00…
GO:0010394	homogalacturonan metabolic process	5	7	6.11e-06	0.000266953	Isoform0001632;Isoform0004483;Isoform0006160;Isoform0012018;Isoform0046184
GO:0006073	cellular glucan metabolic process	56	605	7.72e-06	0.000315932	Isoform0002490;Isoform0002950;Isoform0005765;Isoform0010874;Isoform0011313;Isoform0011976;Isoform0013312;Isoform0013554;Isoform0013766;Isoform0013978;Isoform0017966;Isoform0018953;Isoform0021823;Isoform0024184;Isoform0028773;Isoform0028808;Isoform0029363;Isoform0033700;Isoform0035315;Isoform0035536;Isoform0035653;Isoform0036966;Isoform0039527;Isoform0044557;Isoform0045768;Isoform0045896;Isoform00…
GO:0044264	cellular polysaccharide metabolic process	56	609	9.37e-06	0.000360863	Isoform0002490;Isoform0002950;Isoform0005765;Isoform0010874;Isoform0011313;Isoform0011976;Isoform0013312;Isoform0013554;Isoform0013766;Isoform0013978;Isoform0017966;Isoform0018953;Isoform0021823;Isoform0024184;Isoform0028773;Isoform0028808;Isoform0029363;Isoform0033700;Isoform0035315;Isoform0035536;Isoform0035653;Isoform0036966;Isoform0039527;Isoform0044557;Isoform0045768;Isoform0045896;Isoform00…
GO:0019755	one-carbon compound transport	6	12	1.13e-05	0.000403347	Isoform0005383;Isoform0006693;Isoform0015569;Isoform0022305;Isoform0033423;Isoform0041324
GO:0009620	response to fungus	12	54	1.17e-05	0.000403347	Isoform0003364;Isoform0013312;Isoform0017725;Isoform0017966;Isoform0035536;Isoform0042118;Isoform0047428;Isoform0047700;Isoform0051471;Isoform0051859;Isoform0055089;Isoform0058793
GO:0010565	regulation of cellular ketone metabolic process	6	14	3.36e-05	0.00109932	Isoform0013312;Isoform0035536;Isoform0047428;Isoform0047700;Isoform0051471;Isoform0058793
GO:0015833	peptide transport	13	70	3.95e-05	0.00123192	Isoform0006378;Isoform0018835;Isoform0020803;Isoform0029519;Isoform0029774;Isoform0029992;Isoform0030147;Isoform0036181;Isoform0044488;Isoform0044870;Isoform0046475;Isoform0046856;Isoform0058808
GO:0042886	amide transport	13	72	5.38e-05	0.00153123	Isoform0006378;Isoform0018835;Isoform0020803;Isoform0029519;Isoform0029774;Isoform0029992;Isoform0030147;Isoform0036181;Isoform0044488;Isoform0044870;Isoform0046475;Isoform0046856;Isoform0058808
GO:0044036	cell wall macromolecule metabolic process	13	72	5.38e-05	0.00153123	Isoform0006115;Isoform0013312;Isoform0017725;Isoform0022275;Isoform0026925;Isoform0035536;Isoform0037609;Isoform0041694;Isoform0042118;Isoform0047428;Isoform0047700;Isoform0051471;Isoform0058793
GO:0044042	glucan metabolic process	57	666	6.07e-05	0.00165639	Isoform0002490;Isoform0002950;Isoform0005765;Isoform0010874;Isoform0011313;Isoform0011976;Isoform0013298;Isoform0013312;Isoform0013554;Isoform0013766;Isoform0013978;Isoform0017966;Isoform0018953;Isoform0021823;Isoform0024184;Isoform0028773;Isoform0028808;Isoform0029363;Isoform0033700;Isoform0035315;Isoform0035536;Isoform0035653;Isoform0036966;Isoform0039527;Isoform0044557;Isoform0045768;Isoform00…
GO:0015672	monovalent inorganic cation transport	22	180	0.000104807	0.00274594	Isoform0003364;Isoform0006335;Isoform0015041;Isoform0015203;Isoform0020582;Isoform0021021;Isoform0021813;Isoform0026882;Isoform0029790;Isoform0038015;Isoform0038974;Isoform0041469;Isoform0048526;Isoform0052963;Isoform0060523;Isoform0060598;Isoform0060615;Isoform0060639;Isoform0060649;Isoform0060666;Isoform0060806;Isoform0063248
GO:0009832	plant-type cell wall biogenesis	6	17	0.000121458	0.00303459	Isoform0013312;Isoform0035536;Isoform0047428;Isoform0047700;Isoform0051471;Isoform0058793
GO:0006811	ion transport	71	905	0.00012509	0.00303459	Isoform0000806;Isoform0000891;Isoform0001439;Isoform0003364;Isoform0005973;Isoform0006335;Isoform0006991;Isoform0007469;Isoform0009295;Isoform0009398;Isoform0012172;Isoform0013681;Isoform0014163;Isoform0015041;Isoform0015203;Isoform0018908;Isoform0019434;Isoform0019566;Isoform0020527;Isoform0020582;Isoform0021021;Isoform0021102;Isoform0021813;Isoform0022001;Isoform0023722;Isoform0025647;Isoform00…
GO:0009698	phenylpropanoid metabolic process	22	185	0.000156845	0.00365731	Isoform0000276;Isoform0017145;Isoform0017754;Isoform0019798;Isoform0020854;Isoform0021840;Isoform0026297;Isoform0026429;Isoform0031428;Isoform0032770;Isoform0037251;Isoform0037716;Isoform0038188;Isoform0040846;Isoform0042117;Isoform0044214;Isoform0045132;Isoform0045962;Isoform0046199;Isoform0046239;Isoform0046767;Isoform0061496
GO:0010383	cell wall polysaccharide metabolic process	11	60	0.000173094	0.00365731	Isoform0006115;Isoform0013312;Isoform0022275;Isoform0026925;Isoform0035536;Isoform0037609;Isoform0041694;Isoform0047428;Isoform0047700;Isoform0051471;Isoform0058793
GO:0010410	hemicellulose metabolic process	11	60	0.000173094	0.00365731	Isoform0006115;Isoform0013312;Isoform0022275;Isoform0026925;Isoform0035536;Isoform0037609;Isoform0041694;Isoform0047428;Isoform0047700;Isoform0051471;Isoform0058793
GO:0045491	xylan metabolic process	11	60	0.000173094	0.00365731	Isoform0006115;Isoform0013312;Isoform0022275;Isoform0026925;Isoform0035536;Isoform0037609;Isoform0041694;Isoform0047428;Isoform0047700;Isoform0051471;Isoform0058793
GO:0010393	galacturonan metabolic process	5	12	0.000186577	0.003819	Isoform0001632;Isoform0004483;Isoform0006160;Isoform0012018;Isoform0046184
GO:0044765	single-organism transport	113	1629	0.00024371	0.00483728	Isoform0000057;Isoform0000325;Isoform0000409;Isoform0000806;Isoform0000891;Isoform0001390;Isoform0001439;Isoform0001845;Isoform0003364;Isoform0005231;Isoform0005383;Isoform0005973;Isoform0006335;Isoform0006378;Isoform0006693;Isoform0006991;Isoform0007469;Isoform0007487;Isoform0009295;Isoform0009398;Isoform0011916;Isoform0012172;Isoform0013681;Isoform0014163;Isoform0015041;Isoform0015203;Isoform00…
GO:0019748	secondary metabolic process	28	275	0.000316725	0.00610161	Isoform0000276;Isoform0001390;Isoform0017145;Isoform0017754;Isoform0017966;Isoform0019798;Isoform0020854;Isoform0021840;Isoform0026297;Isoform0026429;Isoform0031428;Isoform0032770;Isoform0037251;Isoform0037716;Isoform0038188;Isoform0040846;Isoform0041942;Isoform0042117;Isoform0043907;Isoform0044214;Isoform0045132;Isoform0045962;Isoform0046199;Isoform0046239;Isoform0046767;Isoform0051859;Isoform00…
GO:0015992	proton transport	20	169	0.000327103	0.0061215	Isoform0006335;Isoform0015041;Isoform0015203;Isoform0020582;Isoform0021021;Isoform0021813;Isoform0026882;Isoform0038015;Isoform0038974;Isoform0041469;Isoform0048526;Isoform0052963;Isoform0060523;Isoform0060598;Isoform0060615;Isoform0060639;Isoform0060649;Isoform0060666;Isoform0060806;Isoform0063248
GO:0045229	external encapsulating structure organization	37	411	0.00045089	0.00820369	Isoform0000766;Isoform0002490;Isoform0004682;Isoform0011313;Isoform0013298;Isoform0013312;Isoform0013681;Isoform0013766;Isoform0013978;Isoform0021823;Isoform0024184;Isoform0029363;Isoform0033700;Isoform0035315;Isoform0035536;Isoform0035653;Isoform0036966;Isoform0039527;Isoform0047428;Isoform0047700;Isoform0049379;Isoform0050167;Isoform0051471;Isoform0051596;Isoform0054035;Isoform0055592;Isoform00…
GO:1902578	single-organism localization	113	1660	0.000495847	0.00877784	Isoform0000057;Isoform0000325;Isoform0000409;Isoform0000806;Isoform0000891;Isoform0001390;Isoform0001439;Isoform0001845;Isoform0003364;Isoform0005231;Isoform0005383;Isoform0005973;Isoform0006335;Isoform0006378;Isoform0006693;Isoform0006991;Isoform0007469;Isoform0007487;Isoform0009295;Isoform0009398;Isoform0011916;Isoform0012172;Isoform0013681;Isoform0014163;Isoform0015041;Isoform0015203;Isoform00…
GO:0009694	jasmonic acid metabolic process	9	49	0.000657096	0.0113263	Isoform0001707;Isoform0006851;Isoform0017966;Isoform0018570;Isoform0036825;Isoform0037221;Isoform0048287;Isoform0051859;Isoform0055089
GO:0072330	monocarboxylic acid biosynthetic process	27	284	0.00114783	0.0191828	Isoform0005886;Isoform0006512;Isoform0006706;Isoform0017966;Isoform0018559;Isoform0022204;Isoform0023556;Isoform0024175;Isoform0025962;Isoform0035574;Isoform0039831;Isoform0042334;Isoform0042403;Isoform0043219;Isoform0043394;Isoform0046601;Isoform0048287;Isoform0051495;Isoform0051859;Isoform0052536;Isoform0053303;Isoform0055089;Isoform0055425;Isoform0060611;Isoform0062744;Isoform0066794;Isoform00…
GO:0009813	flavonoid biosynthetic process	3	5	0.00117147	0.0191828	Isoform0019798;Isoform0037716;Isoform0046239
GO:0000271	polysaccharide biosynthetic process	5	18	0.00156849	0.024461	Isoform0001632;Isoform0004483;Isoform0006160;Isoform0012018;Isoform0046184
GO:0016051	carbohydrate biosynthetic process	5	18	0.00156849	0.024461	Isoform0001632;Isoform0004483;Isoform0006160;Isoform0012018;Isoform0046184
GO:0010941	regulation of cell death	8	46	0.00187655	0.027482	Isoform0000325;Isoform0003364;Isoform0017725;Isoform0017966;Isoform0035594;Isoform0042118;Isoform0051859;Isoform0055089
GO:0043067	regulation of programmed cell death	8	46	0.00187655	0.027482	Isoform0000325;Isoform0003364;Isoform0017725;Isoform0017966;Isoform0035594;Isoform0042118;Isoform0051859;Isoform0055089
GO:0071669	plant-type cell wall organization or biogenesis	6	27	0.00188808	0.027482	Isoform0013312;Isoform0035536;Isoform0047428;Isoform0047700;Isoform0051471;Isoform0058793
GO:0006633	fatty acid biosynthetic process	26	282	0.00216109	0.0307721	Isoform0005886;Isoform0006512;Isoform0006706;Isoform0017966;Isoform0018559;Isoform0022204;Isoform0023556;Isoform0024175;Isoform0025962;Isoform0035574;Isoform0039831;Isoform0042334;Isoform0042403;Isoform0043219;Isoform0043394;Isoform0046601;Isoform0051495;Isoform0051859;Isoform0052536;Isoform0053303;Isoform0055089;Isoform0055425;Isoform0060611;Isoform0062744;Isoform0066794;Isoform0071705
GO:0006072	glycerol-3-phosphate metabolic process	4	12	0.00226588	0.0315777	Isoform0006086;Isoform0007556;Isoform0015014;Isoform0035556
GO:0044262	cellular carbohydrate metabolic process	59	810	0.00266974	0.0364308	Isoform0002490;Isoform0002950;Isoform0005765;Isoform0008337;Isoform0010874;Isoform0011313;Isoform0011976;Isoform0013312;Isoform0013554;Isoform0013766;Isoform0013978;Isoform0016165;Isoform0017966;Isoform0018953;Isoform0021823;Isoform0024184;Isoform0028773;Isoform0028808;Isoform0029363;Isoform0033700;Isoform0034606;Isoform0035315;Isoform0035536;Isoform0035653;Isoform0036966;Isoform0039527;Isoform00…
GO:0009696	salicylic acid metabolic process	6	30	0.00333109	0.0436373	Isoform0003364;Isoform0017725;Isoform0017966;Isoform0042118;Isoform0051859;Isoform0055089
GO:0042537	benzene-containing compound metabolic process	6	30	0.00333109	0.0436373	Isoform0003364;Isoform0017725;Isoform0017966;Isoform0042118;Isoform0051859;Isoform0055089
GO:0009617	response to bacterium	12	100	0.00432863	0.0555932	Isoform0003364;Isoform0013312;Isoform0017725;Isoform0017966;Isoform0035536;Isoform0042118;Isoform0047428;Isoform0047700;Isoform0051471;Isoform0051859;Isoform0055089;Isoform0058793
GO:0006563	L-serine metabolic process	4	15	0.00553853	0.0686148	Isoform0014220;Isoform0023531;Isoform0040821;Isoform0052965
GO:0006818	hydrogen transport	21	228	0.00555204	0.0686148	Isoform0006335;Isoform0015041;Isoform0015203;Isoform0020582;Isoform0021021;Isoform0021813;Isoform0026882;Isoform0038015;Isoform0038974;Isoform0039010;Isoform0041469;Isoform0048526;Isoform0052963;Isoform0060523;Isoform0060598;Isoform0060615;Isoform0060639;Isoform0060649;Isoform0060666;Isoform0060806;Isoform0063248
GO:0007215	glutamate receptor signaling pathway	3	8	0.00585361	0.0710021	Isoform0011916;Isoform0050542;Isoform0059941
GO:0018958	phenol-containing compound metabolic process	6	34	0.00636237	0.07577	Isoform0003364;Isoform0017725;Isoform0017966;Isoform0042118;Isoform0051859;Isoform0055089
GO:0006900	membrane budding	5	27	0.0101637	0.11478	Isoform0026542;Isoform0028916;Isoform0029584;Isoform0045925;Isoform0053592
GO:0006901	vesicle coating	5	27	0.0101637	0.11478	Isoform0026542;Isoform0028916;Isoform0029584;Isoform0045925;Isoform0053592
GO:0016050	vesicle organization	5	27	0.0101637	0.11478	Isoform0026542;Isoform0028916;Isoform0029584;Isoform0045925;Isoform0053592
GO:0071554	cell wall organization or biogenesis	15	154	0.0107963	0.119858	Isoform0000766;Isoform0004682;Isoform0006115;Isoform0013312;Isoform0017725;Isoform0022275;Isoform0026925;Isoform0035536;Isoform0037609;Isoform0041694;Isoform0042118;Isoform0047428;Isoform0047700;Isoform0051471;Isoform0058793
GO:0009798	axis specification	4	19	0.0134058	0.143947	Isoform0013270;Isoform0017055;Isoform0020350;Isoform0048438
GO:0009943	adaxial/abaxial axis specification	4	19	0.0134058	0.143947	Isoform0013270;Isoform0017055;Isoform0020350;Isoform0048438
GO:0009751	response to salicylic acid	5	30	0.015854	0.162256	Isoform0003364;Isoform0017966;Isoform0035594;Isoform0051859;Isoform0055089
GO:0009863	salicylic acid mediated signaling pathway	5	30	0.015854	0.162256	Isoform0003364;Isoform0017966;Isoform0035594;Isoform0051859;Isoform0055089
GO:0071446	cellular response to salicylic acid stimulus	5	30	0.015854	0.162256	Isoform0003364;Isoform0017966;Isoform0035594;Isoform0051859;Isoform0055089
GO:0002220	innate immune response activating cell surface receptor signaling pathway	2	5	0.0227847	0.201675	Isoform0017725;Isoform0042118
GO:0002237	response to molecule of bacterial origin	2	5	0.0227847	0.201675	Isoform0017725;Isoform0042118
GO:0002429	immune response-activating cell surface receptor signaling pathway	2	5	0.0227847	0.201675	Isoform0017725;Isoform0042118
GO:0002757	immune response-activating signal transduction	2	5	0.0227847	0.201675	Isoform0017725;Isoform0042118
GO:0002758	innate immune response-activating signal transduction	2	5	0.0227847	0.201675	Isoform0017725;Isoform0042118
GO:0002764	immune response-regulating signaling pathway	2	5	0.0227847	0.201675	Isoform0017725;Isoform0042118
GO:0002768	immune response-regulating cell surface receptor signaling pathway	2	5	0.0227847	0.201675	Isoform0017725;Isoform0042118
GO:0009595	detection of biotic stimulus	2	5	0.0227847	0.201675	Isoform0017725;Isoform0042118
GO:0032490	detection of molecule of bacterial origin	2	5	0.0227847	0.201675	Isoform0017725;Isoform0042118
GO:0098581	detection of external biotic stimulus	2	5	0.0227847	0.201675	Isoform0017725;Isoform0042118
GO:0009152	purine ribonucleotide biosynthetic process	14	154	0.0232348	0.202917	Isoform0006335;Isoform0020582;Isoform0021021;Isoform0021813;Isoform0038015;Isoform0038974;Isoform0041469;Isoform0048526;Isoform0052963;Isoform0060598;Isoform0060639;Isoform0060649;Isoform0060666;Isoform0060806
GO:0008610	lipid biosynthetic process	34	476	0.0251282	0.216565	Isoform0001390;Isoform0005886;Isoform0006512;Isoform0006706;Isoform0013681;Isoform0017069;Isoform0017966;Isoform0018559;Isoform0022204;Isoform0022667;Isoform0023556;Isoform0023578;Isoform0024175;Isoform0025962;Isoform0035574;Isoform0037885;Isoform0039831;Isoform0041942;Isoform0042334;Isoform0042403;Isoform0043219;Isoform0043394;Isoform0043907;Isoform0046601;Isoform0051495;Isoform0051859;Isoform00…
GO:0043207	response to external biotic stimulus	18	218	0.0268144	0.222919	Isoform0001707;Isoform0003364;Isoform0006851;Isoform0013312;Isoform0017725;Isoform0017966;Isoform0018570;Isoform0035536;Isoform0035594;Isoform0036825;Isoform0037221;Isoform0042118;Isoform0047428;Isoform0047700;Isoform0051471;Isoform0051859;Isoform0055089;Isoform0058793
GO:0051707	response to other organism	18	218	0.0268144	0.222919	Isoform0001707;Isoform0003364;Isoform0006851;Isoform0013312;Isoform0017725;Isoform0017966;Isoform0018570;Isoform0035536;Isoform0035594;Isoform0036825;Isoform0037221;Isoform0042118;Isoform0047428;Isoform0047700;Isoform0051471;Isoform0051859;Isoform0055089;Isoform0058793
GO:0006164	purine nucleotide biosynthetic process	14	157	0.0268864	0.222919	Isoform0006335;Isoform0020582;Isoform0021021;Isoform0021813;Isoform0038015;Isoform0038974;Isoform0041469;Isoform0048526;Isoform0052963;Isoform0060598;Isoform0060639;Isoform0060649;Isoform0060666;Isoform0060806
GO:0009607	response to biotic stimulus	18	220	0.0290208	0.237608	Isoform0001707;Isoform0003364;Isoform0006851;Isoform0013312;Isoform0017725;Isoform0017966;Isoform0018570;Isoform0035536;Isoform0035594;Isoform0036825;Isoform0037221;Isoform0042118;Isoform0047428;Isoform0047700;Isoform0051471;Isoform0051859;Isoform0055089;Isoform0058793
GO:0005975	carbohydrate metabolic process	83	1350	0.0314432	0.254263	Isoform0001632;Isoform0001845;Isoform0002490;Isoform0002950;Isoform0004483;Isoform0004543;Isoform0005765;Isoform0006115;Isoform0006160;Isoform0008337;Isoform0010874;Isoform0011118;Isoform0011313;Isoform0011976;Isoform0012018;Isoform0013118;Isoform0013298;Isoform0013312;Isoform0013554;Isoform0013766;Isoform0013978;Isoform0016165;Isoform0017619;Isoform0017966;Isoform0018953;Isoform0021105;Isoform00…
GO:0072522	purine-containing compound biosynthetic process	14	161	0.0323922	0.258742	Isoform0006335;Isoform0020582;Isoform0021021;Isoform0021813;Isoform0038015;Isoform0038974;Isoform0041469;Isoform0048526;Isoform0052963;Isoform0060598;Isoform0060639;Isoform0060649;Isoform0060666;Isoform0060806
GO:0008037	cell recognition	4	25	0.0345154	0.272381	Isoform0027768;Isoform0031061;Isoform0044542;Isoform0045129
GO:0010243	response to organonitrogen compound	6	49	0.0351646	0.2742	Isoform0003364;Isoform0017725;Isoform0017966;Isoform0042118;Isoform0051859;Isoform0055089
GO:0052646	alditol phosphate metabolic process	4	26	0.0392216	0.299088	Isoform0006086;Isoform0007556;Isoform0015014;Isoform0035556
GO:0006771	riboflavin metabolic process	3	16	0.0433951	0.299088	Isoform0033343;Isoform0033545;Isoform0036327
GO:0015977	carbon fixation	3	16	0.0433951	0.299088	Isoform0016138;Isoform0016779;Isoform0020533
GO:0042726	flavin-containing compound metabolic process	3	16	0.0433951	0.299088	Isoform0033343;Isoform0033545;Isoform0036327
GO:0009150	purine ribonucleotide metabolic process	14	168	0.0439243	0.299088	Isoform0006335;Isoform0020582;Isoform0021021;Isoform0021813;Isoform0038015;Isoform0038974;Isoform0041469;Isoform0048526;Isoform0052963;Isoform0060598;Isoform0060639;Isoform0060649;Isoform0060666;Isoform0060806
GO:0002218	activation of innate immune response	2	7	0.0447491	0.299088	Isoform0017725;Isoform0042118
GO:0002253	activation of immune response	2	7	0.0447491	0.299088	Isoform0017725;Isoform0042118
GO:0002684	positive regulation of immune system process	2	7	0.0447491	0.299088	Isoform0017725;Isoform0042118
GO:0015696	ammonium transport	2	7	0.0447491	0.299088	Isoform0003364;Isoform0029790
GO:0031349	positive regulation of defense response	2	7	0.0447491	0.299088	Isoform0017725;Isoform0042118
GO:0045088	regulation of innate immune response	2	7	0.0447491	0.299088	Isoform0017725;Isoform0042118
GO:0045089	positive regulation of innate immune response	2	7	0.0447491	0.299088	Isoform0017725;Isoform0042118
GO:0050776	regulation of immune response	2	7	0.0447491	0.299088	Isoform0017725;Isoform0042118
GO:0050778	positive regulation of immune response	2	7	0.0447491	0.299088	Isoform0017725;Isoform0042118
GO:0008655	pyrimidine-containing compound salvage	1	1	0.0502455	0.332432	Isoform0018509
GO:0009965	leaf morphogenesis	2	8	0.0577143	0.369139	Isoform0023578;Isoform0037885
GO:0010016	shoot system morphogenesis	2	8	0.0577143	0.369139	Isoform0023578;Isoform0037885
GO:0050832	defense response to fungus	2	8	0.0577143	0.369139	Isoform0017725;Isoform0042118
GO:0009812	flavonoid metabolic process	5	42	0.0580478	0.369139	Isoform0018509;Isoform0019798;Isoform0037716;Isoform0046239;Isoform0054463
GO:0006812	cation transport	39	603	0.0639539	0.402786	Isoform0000891;Isoform0003364;Isoform0005973;Isoform0006335;Isoform0007469;Isoform0009295;Isoform0009398;Isoform0012172;Isoform0014163;Isoform0015041;Isoform0015203;Isoform0018908;Isoform0020582;Isoform0021021;Isoform0021813;Isoform0026882;Isoform0027528;Isoform0029790;Isoform0030157;Isoform0033892;Isoform0036233;Isoform0038015;Isoform0038974;Isoform0041469;Isoform0043568;Isoform0045736;Isoform00…
GO:0006631	fatty acid metabolic process	32	482	0.0662956	0.413558	Isoform0005886;Isoform0006512;Isoform0006706;Isoform0017966;Isoform0018559;Isoform0018680;Isoform0022204;Isoform0023556;Isoform0024175;Isoform0025962;Isoform0035574;Isoform0039831;Isoform0040373;Isoform0040694;Isoform0042334;Isoform0042403;Isoform0043219;Isoform0043394;Isoform0044191;Isoform0046601;Isoform0046805;Isoform0048287;Isoform0051495;Isoform0051859;Isoform0052536;Isoform0053303;Isoform00…
GO:0009069	serine family amino acid metabolic process	7	72	0.0692181	0.427715	Isoform0014220;Isoform0017966;Isoform0023531;Isoform0040821;Isoform0051859;Isoform0052965;Isoform0055089
GO:0007166	cell surface receptor signaling pathway	6	58	0.0700836	0.429016	Isoform0005452;Isoform0011916;Isoform0017725;Isoform0042118;Isoform0050542;Isoform0059941
GO:0002682	regulation of immune system process	2	9	0.0717884	0.435383	Isoform0017725;Isoform0042118
GO:0006163	purine nucleotide metabolic process	14	182	0.0750493	0.450984	Isoform0006335;Isoform0020582;Isoform0021021;Isoform0021813;Isoform0038015;Isoform0038974;Isoform0041469;Isoform0048526;Isoform0052963;Isoform0060598;Isoform0060639;Isoform0060649;Isoform0060666;Isoform0060806
GO:0016143	S-glycoside metabolic process	6	61	0.0849899	0.498878	Isoform0001390;Isoform0017966;Isoform0041942;Isoform0043907;Isoform0051859;Isoform0055089
GO:0019757	glycosinolate metabolic process	6	61	0.0849899	0.498878	Isoform0001390;Isoform0017966;Isoform0041942;Isoform0043907;Isoform0051859;Isoform0055089
GO:0009955	adaxial/abaxial pattern specification	5	47	0.0856385	0.498878	Isoform0013270;Isoform0017055;Isoform0020350;Isoform0035419;Isoform0048438
GO:0009593	detection of chemical stimulus	2	10	0.0868275	0.498878	Isoform0017725;Isoform0042118
GO:0031347	regulation of defense response	2	10	0.0868275	0.498878	Isoform0017725;Isoform0042118
GO:0051704	multi-organism process	19	270	0.0876897	0.49945	Isoform0001707;Isoform0003364;Isoform0006851;Isoform0013312;Isoform0017725;Isoform0017966;Isoform0018570;Isoform0023610;Isoform0035536;Isoform0035594;Isoform0036825;Isoform0037221;Isoform0042118;Isoform0047428;Isoform0047700;Isoform0051471;Isoform0051859;Isoform0055089;Isoform0058793
GO:0015675	nickel cation transport	1	2	0.097969	0.553187	Isoform0033892
GO:0071705	nitrogen compound transport	18	259	0.103044	0.57687	Isoform0003364;Isoform0006378;Isoform0007487;Isoform0016135;Isoform0018835;Isoform0020803;Isoform0029519;Isoform0029774;Isoform0029790;Isoform0029992;Isoform0030147;Isoform0033298;Isoform0036181;Isoform0044488;Isoform0044870;Isoform0046475;Isoform0046856;Isoform0058808
GO:0042044	fluid transport	4	36	0.104889	0.582224	Isoform0001390;Isoform0001845;Isoform0041942;Isoform0043907
GO:0080134	regulation of response to stress	2	12	0.119283	0.656556	Isoform0017725;Isoform0042118
GO:0051234	establishment of localization	165	3019	0.122098	0.666449	Isoform0000057;Isoform0000325;Isoform0000409;Isoform0000806;Isoform0000891;Isoform0001390;Isoform0001439;Isoform0001845;Isoform0002008;Isoform0003176;Isoform0003364;Isoform0004206;Isoform0005231;Isoform0005383;Isoform0005973;Isoform0006335;Isoform0006378;Isoform0006693;Isoform0006991;Isoform0007469;Isoform0007487;Isoform0007988;Isoform0009295;Isoform0009398;Isoform0009528;Isoform0010846;Isoform00…
GO:0006828	manganese ion transport	1	3	0.143297	0.771483	Isoform0027528
GO:0072521	purine-containing compound metabolic process	14	203	0.143696	0.771483	Isoform0006335;Isoform0020582;Isoform0021021;Isoform0021813;Isoform0038015;Isoform0038974;Isoform0041469;Isoform0048526;Isoform0052963;Isoform0060598;Isoform0060639;Isoform0060649;Isoform0060666;Isoform0060806
GO:0002252	immune effector process	2	14	0.154147	0.820865	Isoform0017725;Isoform0042118
GO:0009260	ribonucleotide biosynthetic process	14	207	0.159745	0.837064	Isoform0006335;Isoform0020582;Isoform0021021;Isoform0021813;Isoform0038015;Isoform0038974;Isoform0041469;Isoform0048526;Isoform0052963;Isoform0060598;Isoform0060639;Isoform0060649;Isoform0060666;Isoform0060806
GO:0046390	ribose phosphate biosynthetic process	14	207	0.159745	0.837064	Isoform0006335;Isoform0020582;Isoform0021021;Isoform0021813;Isoform0038015;Isoform0038974;Isoform0041469;Isoform0048526;Isoform0052963;Isoform0060598;Isoform0060639;Isoform0060649;Isoform0060666;Isoform0060806
GO:0044550	secondary metabolite biosynthetic process	13	191	0.165319	0.859394	Isoform0000276;Isoform0001390;Isoform0017145;Isoform0017754;Isoform0019798;Isoform0031428;Isoform0037251;Isoform0037716;Isoform0041942;Isoform0043907;Isoform0044214;Isoform0046239;Isoform0061496
GO:0048584	positive regulation of response to stimulus	2	15	0.172233	0.888289	Isoform0017725;Isoform0042118
GO:0048509	regulation of meristem development	5	59	0.173988	0.89033	Isoform0001845;Isoform0013270;Isoform0017055;Isoform0020350;Isoform0048438
GO:0001101	response to acid chemical	14	218	0.208347	1	Isoform0001707;Isoform0003364;Isoform0006851;Isoform0009295;Isoform0017966;Isoform0018570;Isoform0023578;Isoform0035594;Isoform0036825;Isoform0037221;Isoform0037885;Isoform0048287;Isoform0051859;Isoform0055089
GO:0009699	phenylpropanoid biosynthetic process	10	148	0.210978	1	Isoform0000276;Isoform0017145;Isoform0017754;Isoform0019798;Isoform0031428;Isoform0037251;Isoform0037716;Isoform0044214;Isoform0046239;Isoform0061496
GO:0009267	cellular response to starvation	4	48	0.22029	1	Isoform0001390;Isoform0003364;Isoform0009295;Isoform0043907
GO:0042594	response to starvation	4	48	0.22029	1	Isoform0001390;Isoform0003364;Isoform0009295;Isoform0043907
GO:0009259	ribonucleotide metabolic process	14	221	0.222645	1	Isoform0006335;Isoform0020582;Isoform0021021;Isoform0021813;Isoform0038015;Isoform0038974;Isoform0041469;Isoform0048526;Isoform0052963;Isoform0060598;Isoform0060639;Isoform0060649;Isoform0060666;Isoform0060806
GO:0019693	ribose phosphate metabolic process	14	221	0.222645	1	Isoform0006335;Isoform0020582;Isoform0021021;Isoform0021813;Isoform0038015;Isoform0038974;Isoform0041469;Isoform0048526;Isoform0052963;Isoform0060598;Isoform0060639;Isoform0060649;Isoform0060666;Isoform0060806
GO:0051179	localization	166	3129	0.22717	1	Isoform0000057;Isoform0000325;Isoform0000409;Isoform0000806;Isoform0000891;Isoform0001390;Isoform0001439;Isoform0001845;Isoform0002008;Isoform0003176;Isoform0003364;Isoform0004206;Isoform0005231;Isoform0005383;Isoform0005973;Isoform0006335;Isoform0006378;Isoform0006693;Isoform0006991;Isoform0007469;Isoform0007487;Isoform0007988;Isoform0009295;Isoform0009398;Isoform0009528;Isoform0010846;Isoform00…
GO:0009247	glycolipid biosynthetic process	2	18	0.228104	1	Isoform0001390;Isoform0043907
GO:0031668	cellular response to extracellular stimulus	4	49	0.231134	1	Isoform0001390;Isoform0003364;Isoform0009295;Isoform0043907
GO:0031669	cellular response to nutrient levels	4	49	0.231134	1	Isoform0001390;Isoform0003364;Isoform0009295;Isoform0043907
GO:0071496	cellular response to external stimulus	4	49	0.231134	1	Isoform0001390;Isoform0003364;Isoform0009295;Isoform0043907
GO:0003002	regionalization	9	134	0.232044	1	Isoform0006115;Isoform0013270;Isoform0017055;Isoform0020350;Isoform0022275;Isoform0026925;Isoform0035419;Isoform0037609;Isoform0048438
GO:0009605	response to external stimulus	24	406	0.233076	1	Isoform0001390;Isoform0001707;Isoform0003364;Isoform0006851;Isoform0009295;Isoform0013312;Isoform0013681;Isoform0017725;Isoform0017966;Isoform0018570;Isoform0035536;Isoform0035594;Isoform0036825;Isoform0036905;Isoform0037221;Isoform0042118;Isoform0043907;Isoform0047428;Isoform0047700;Isoform0051471;Isoform0051859;Isoform0055089;Isoform0058793;Isoform0059413
GO:0009991	response to extracellular stimulus	4	50	0.242106	1	Isoform0001390;Isoform0003364;Isoform0009295;Isoform0043907
GO:0031667	response to nutrient levels	4	50	0.242106	1	Isoform0001390;Isoform0003364;Isoform0009295;Isoform0043907
GO:0006694	steroid biosynthetic process	5	67	0.246265	1	Isoform0013681;Isoform0017069;Isoform0023578;Isoform0037885;Isoform0041942
GO:0046467	membrane lipid biosynthetic process	2	19	0.24703	1	Isoform0001390;Isoform0043907
GO:0006544	glycine metabolic process	3	35	0.256495	1	Isoform0017966;Isoform0051859;Isoform0055089
GO:0009891	positive regulation of biosynthetic process	1	6	0.266079	1	Isoform0000325
GO:0055076	transition metal ion homeostasis	2	21	0.284975	1	Isoform0017906;Isoform0027528
GO:0009642	response to light intensity	4	54	0.287013	1	Isoform0001845;Isoform0017966;Isoform0051859;Isoform0055089
GO:0071229	cellular response to acid chemical	5	72	0.294818	1	Isoform0003364;Isoform0017966;Isoform0035594;Isoform0051859;Isoform0055089
GO:0009814	defense response, incompatible interaction	3	38	0.298056	1	Isoform0003364;Isoform0017725;Isoform0042118
GO:0002009	morphogenesis of an epithelium	1	7	0.302967	1	Isoform0001395
GO:0008154	actin polymerization or depolymerization	1	7	0.302967	1	Isoform0035832
GO:0019418	sulfide oxidation	1	7	0.302967	1	Isoform0041942
GO:0048729	tissue morphogenesis	1	7	0.302967	1	Isoform0001395
GO:0060429	epithelium development	1	7	0.302967	1	Isoform0001395
GO:0022610	biological adhesion	5	74	0.314688	1	Isoform0001632;Isoform0004483;Isoform0006160;Isoform0012018;Isoform0046184
GO:0009799	specification of symmetry	4	57	0.321417	1	Isoform0013270;Isoform0017055;Isoform0020350;Isoform0048438
GO:0009746	response to hexose	3	40	0.325979	1	Isoform0001390;Isoform0003364;Isoform0043907
GO:0034284	response to monosaccharide	3	40	0.325979	1	Isoform0001390;Isoform0003364;Isoform0043907
GO:0015791	polyol transport	1	8	0.338003	1	Isoform0039010
GO:0016106	sesquiterpenoid biosynthetic process	1	8	0.338003	1	Isoform0022667
GO:0043649	dicarboxylic acid catabolic process	1	8	0.338003	1	Isoform0012933
GO:0016128	phytosteroid metabolic process	3	41	0.339946	1	Isoform0013681;Isoform0023578;Isoform0037885
GO:0016129	phytosteroid biosynthetic process	3	41	0.339946	1	Isoform0013681;Isoform0023578;Isoform0037885
GO:0009108	coenzyme biosynthetic process	7	114	0.348762	1	Isoform0004390;Isoform0006814;Isoform0010293;Isoform0011594;Isoform0014623;Isoform0016544;Isoform0056771
GO:0006664	glycolipid metabolic process	2	25	0.359938	1	Isoform0001390;Isoform0043907
GO:1903509	liposaccharide metabolic process	2	25	0.359938	1	Isoform0001390;Isoform0043907
GO:0006810	transport	125	2409	0.360994	1	Isoform0000057;Isoform0000325;Isoform0000409;Isoform0000806;Isoform0000891;Isoform0001390;Isoform0001439;Isoform0001845;Isoform0003364;Isoform0004206;Isoform0005231;Isoform0005383;Isoform0005973;Isoform0006335;Isoform0006378;Isoform0006693;Isoform0006991;Isoform0007469;Isoform0007487;Isoform0007988;Isoform0009295;Isoform0009398;Isoform0010846;Isoform0011916;Isoform0012172;Isoform0013681;Isoform00…
GO:0016144	S-glycoside biosynthetic process	3	43	0.3678	1	Isoform0001390;Isoform0041942;Isoform0043907
GO:0019758	glycosinolate biosynthetic process	3	43	0.3678	1	Isoform0001390;Isoform0041942;Isoform0043907
GO:0048366	leaf development	3	43	0.3678	1	Isoform0023578;Isoform0035419;Isoform0037885
GO:0042430	indole-containing compound metabolic process	2	26	0.378268	1	Isoform0006220;Isoform0041942
GO:0034285	response to disaccharide	4	62	0.379214	1	Isoform0003364;Isoform0017966;Isoform0051859;Isoform0055089
GO:0051606	detection of stimulus	2	27	0.396373	1	Isoform0017725;Isoform0042118
GO:0046165	alcohol biosynthetic process	4	64	0.402248	1	Isoform0013681;Isoform0023578;Isoform0027528;Isoform0037885
GO:0000041	transition metal ion transport	3	46	0.409142	1	Isoform0009295;Isoform0027528;Isoform0033892
GO:0006950	response to stress	56	1076	0.411106	1	Isoform0000409;Isoform0000424;Isoform0001390;Isoform0001707;Isoform0001845;Isoform0002807;Isoform0003011;Isoform0003310;Isoform0003364;Isoform0003689;Isoform0005043;Isoform0005502;Isoform0005640;Isoform0005803;Isoform0006244;Isoform0006474;Isoform0006599;Isoform0006851;Isoform0007235;Isoform0009295;Isoform0009632;Isoform0009701;Isoform0012899;Isoform0013227;Isoform0013312;Isoform0013653;Isoform00…
GO:0008202	steroid metabolic process	5	84	0.415336	1	Isoform0013681;Isoform0017069;Isoform0023578;Isoform0037885;Isoform0041942
GO:0009411	response to UV	4	66	0.425123	1	Isoform0001390;Isoform0013681;Isoform0036905;Isoform0043907
GO:0006865	amino acid transport	1	11	0.432905	1	Isoform0003364
GO:0044283	small molecule biosynthetic process	34	653	0.440066	1	Isoform0001390;Isoform0005886;Isoform0006512;Isoform0006706;Isoform0013681;Isoform0017966;Isoform0018559;Isoform0022204;Isoform0023556;Isoform0023578;Isoform0024175;Isoform0025962;Isoform0027528;Isoform0035574;Isoform0037885;Isoform0039831;Isoform0041942;Isoform0042334;Isoform0042403;Isoform0043219;Isoform0043394;Isoform0043907;Isoform0046601;Isoform0048287;Isoform0051495;Isoform0051859;Isoform00…
GO:0016114	terpenoid biosynthetic process	6	106	0.442634	1	Isoform0001390;Isoform0017966;Isoform0022667;Isoform0043907;Isoform0051859;Isoform0055089
GO:1901617	organic hydroxy compound biosynthetic process	4	68	0.44777	1	Isoform0013681;Isoform0023578;Isoform0027528;Isoform0037885
GO:0001763	morphogenesis of a branching structure	1	12	0.461416	1	Isoform0022667
GO:0042743	hydrogen peroxide metabolic process	5	89	0.465051	1	Isoform0003364;Isoform0017966;Isoform0035594;Isoform0051859;Isoform0055089
GO:1901293	nucleoside phosphate biosynthetic process	16	305	0.466235	1	Isoform0004086;Isoform0006335;Isoform0014000;Isoform0020582;Isoform0021021;Isoform0021813;Isoform0038015;Isoform0038974;Isoform0041469;Isoform0048526;Isoform0052963;Isoform0060598;Isoform0060639;Isoform0060649;Isoform0060666;Isoform0060806
GO:0016109	tetraterpenoid biosynthetic process	5	90	0.474852	1	Isoform0001390;Isoform0017966;Isoform0043907;Isoform0051859;Isoform0055089
GO:0016053	organic acid biosynthetic process	30	585	0.481039	1	Isoform0001390;Isoform0005886;Isoform0006512;Isoform0006706;Isoform0017966;Isoform0018559;Isoform0022204;Isoform0023556;Isoform0024175;Isoform0025962;Isoform0035574;Isoform0039831;Isoform0041942;Isoform0042334;Isoform0042403;Isoform0043219;Isoform0043394;Isoform0043907;Isoform0046601;Isoform0048287;Isoform0051495;Isoform0051859;Isoform0052536;Isoform0053303;Isoform0055089;Isoform0055425;Isoform00…
GO:0046394	carboxylic acid biosynthetic process	30	585	0.481039	1	Isoform0001390;Isoform0005886;Isoform0006512;Isoform0006706;Isoform0017966;Isoform0018559;Isoform0022204;Isoform0023556;Isoform0024175;Isoform0025962;Isoform0035574;Isoform0039831;Isoform0041942;Isoform0042334;Isoform0042403;Isoform0043219;Isoform0043394;Isoform0043907;Isoform0046601;Isoform0048287;Isoform0051495;Isoform0051859;Isoform0052536;Isoform0053303;Isoform0055089;Isoform0055425;Isoform00…
GO:0006586	indolalkylamine metabolic process	1	13	0.488495	1	Isoform0006220
GO:0015850	organic hydroxy compound transport	1	13	0.488495	1	Isoform0039010
GO:0044711	single-organism biosynthetic process	67	1324	0.494608	1	Isoform0000276;Isoform0001390;Isoform0001632;Isoform0004086;Isoform0004483;Isoform0005886;Isoform0006160;Isoform0006335;Isoform0006512;Isoform0006706;Isoform0012018;Isoform0013681;Isoform0014000;Isoform0017069;Isoform0017145;Isoform0017754;Isoform0017966;Isoform0018559;Isoform0019798;Isoform0020582;Isoform0021021;Isoform0021813;Isoform0022204;Isoform0022667;Isoform0023556;Isoform0023578;Isoform00…
GO:0009933	meristem structural organization	6	112	0.495841	1	Isoform0001845;Isoform0013270;Isoform0017055;Isoform0020350;Isoform0035419;Isoform0048438
GO:0048532	anatomical structure arrangement	6	112	0.495841	1	Isoform0001845;Isoform0013270;Isoform0017055;Isoform0020350;Isoform0035419;Isoform0048438
GO:0007389	pattern specification process	9	172	0.499008	1	Isoform0006115;Isoform0013270;Isoform0017055;Isoform0020350;Isoform0022275;Isoform0026925;Isoform0035419;Isoform0037609;Isoform0048438
GO:0006875	cellular metal ion homeostasis	1	14	0.514214	1	Isoform0027528
GO:0046916	cellular transition metal ion homeostasis	1	14	0.514214	1	Isoform0027528
GO:0098542	defense response to other organism	3	54	0.514353	1	Isoform0003364;Isoform0017725;Isoform0042118
GO:0006955	immune response	6	116	0.530339	1	Isoform0003364;Isoform0017725;Isoform0017966;Isoform0042118;Isoform0051859;Isoform0055089
GO:0045087	innate immune response	6	116	0.530339	1	Isoform0003364;Isoform0017725;Isoform0017966;Isoform0042118;Isoform0051859;Isoform0055089
GO:0016108	tetraterpenoid metabolic process	5	96	0.532257	1	Isoform0001390;Isoform0017966;Isoform0043907;Isoform0051859;Isoform0055089
GO:0009683	indoleacetic acid metabolic process	1	15	0.538641	1	Isoform0041942
GO:0019725	cellular homeostasis	6	117	0.538812	1	Isoform0003689;Isoform0007813;Isoform0008425;Isoform0008734;Isoform0010677;Isoform0027528
GO:0008299	isoprenoid biosynthetic process	6	118	0.547219	1	Isoform0001390;Isoform0017966;Isoform0022667;Isoform0043907;Isoform0051859;Isoform0055089
GO:1901135	carbohydrate derivative metabolic process	24	483	0.55279	1	Isoform0001390;Isoform0006086;Isoform0006335;Isoform0007556;Isoform0015014;Isoform0017966;Isoform0020582;Isoform0021021;Isoform0021813;Isoform0035556;Isoform0038015;Isoform0038974;Isoform0041469;Isoform0041942;Isoform0043907;Isoform0048526;Isoform0051859;Isoform0052963;Isoform0055089;Isoform0060598;Isoform0060639;Isoform0060649;Isoform0060666;Isoform0060806
GO:0009850	auxin metabolic process	1	16	0.561841	1	Isoform0041942
GO:0032958	inositol phosphate biosynthetic process	1	16	0.561841	1	Isoform0027528
GO:0046173	polyol biosynthetic process	1	16	0.561841	1	Isoform0027528
GO:0043094	cellular metabolic compound salvage	3	58	0.563084	1	Isoform0016138;Isoform0016779;Isoform0018509
GO:0009914	hormone transport	2	39	0.590047	1	Isoform0013681;Isoform0038622
GO:0046471	phosphatidylglycerol metabolic process	3	61	0.597612	1	Isoform0017966;Isoform0051859;Isoform0055089
GO:0009165	nucleotide biosynthetic process	14	290	0.60002	1	Isoform0006335;Isoform0020582;Isoform0021021;Isoform0021813;Isoform0038015;Isoform0038974;Isoform0041469;Isoform0048526;Isoform0052963;Isoform0060598;Isoform0060639;Isoform0060649;Isoform0060666;Isoform0060806
GO:0002376	immune system process	6	125	0.603997	1	Isoform0003364;Isoform0017725;Isoform0017966;Isoform0042118;Isoform0051859;Isoform0055089
GO:0008152	metabolic process	673	13462	0.619371	1	Isoform0000028;Isoform0000276;Isoform0000284;Isoform0000424;Isoform0000714;Isoform0000723;Isoform0000912;Isoform0001065;Isoform0001284;Isoform0001319;Isoform0001341;Isoform0001390;Isoform0001395;Isoform0001528;Isoform0001550;Isoform0001632;Isoform0001707;Isoform0001761;Isoform0001845;Isoform0001955;Isoform0002154;Isoform0002207;Isoform0002215;Isoform0002490;Isoform0002538;Isoform0002682;Isoform00…
GO:0006281	DNA repair	6	127	0.619492	1	Isoform0003011;Isoform0003310;Isoform0016118;Isoform0028339;Isoform0043675;Isoform0044179
GO:0006766	vitamin metabolic process	3	63	0.619616	1	Isoform0033343;Isoform0033545;Isoform0036327
GO:0006767	water-soluble vitamin metabolic process	3	63	0.619616	1	Isoform0033343;Isoform0033545;Isoform0036327
GO:0090407	organophosphate biosynthetic process	17	356	0.620967	1	Isoform0004086;Isoform0006335;Isoform0014000;Isoform0020582;Isoform0021021;Isoform0021813;Isoform0027528;Isoform0038015;Isoform0038974;Isoform0041469;Isoform0048526;Isoform0052963;Isoform0060598;Isoform0060639;Isoform0060649;Isoform0060666;Isoform0060806
GO:0009767	photosynthetic electron transport chain	1	19	0.62468	1	Isoform0035711
GO:0072593	reactive oxygen species metabolic process	5	108	0.637437	1	Isoform0003364;Isoform0017966;Isoform0035594;Isoform0051859;Isoform0055089
GO:0055065	metal ion homeostasis	2	44	0.655954	1	Isoform0017906;Isoform0027528
GO:0043647	inositol phosphate metabolic process	1	21	0.661487	1	Isoform0027528
GO:0010038	response to metal ion	3	68	0.670961	1	Isoform0027528;Isoform0041942;Isoform0048287
GO:0006952	defense response	8	178	0.676545	1	Isoform0000424;Isoform0003364;Isoform0017725;Isoform0017966;Isoform0035594;Isoform0042118;Isoform0051859;Isoform0055089
GO:1901137	carbohydrate derivative biosynthetic process	17	369	0.678801	1	Isoform0001390;Isoform0006335;Isoform0020582;Isoform0021021;Isoform0021813;Isoform0038015;Isoform0038974;Isoform0041469;Isoform0041942;Isoform0043907;Isoform0048526;Isoform0052963;Isoform0060598;Isoform0060639;Isoform0060649;Isoform0060666;Isoform0060806
GO:0010817	regulation of hormone levels	3	69	0.680596	1	Isoform0013681;Isoform0038622;Isoform0041942
GO:0006974	cellular response to DNA damage stimulus	6	136	0.684748	1	Isoform0003011;Isoform0003310;Isoform0016118;Isoform0028339;Isoform0043675;Isoform0044179
GO:0009826	unidimensional cell growth	1	23	0.694688	1	Isoform0013681
GO:0019684	photosynthesis, light reaction	1	23	0.694688	1	Isoform0035711
GO:0006629	lipid metabolic process	48	1017	0.697553	1	Isoform0001065;Isoform0001390;Isoform0001528;Isoform0003053;Isoform0005886;Isoform0006512;Isoform0006706;Isoform0013672;Isoform0013681;Isoform0015232;Isoform0017069;Isoform0017389;Isoform0017966;Isoform0018559;Isoform0018680;Isoform0022204;Isoform0022667;Isoform0023556;Isoform0023578;Isoform0024175;Isoform0025962;Isoform0029441;Isoform0035574;Isoform0037885;Isoform0039831;Isoform0040373;Isoform00…
GO:0060560	developmental growth involved in morphogenesis	1	24	0.710048	1	Isoform0013681
GO:0006354	DNA-templated transcription, elongation	2	50	0.723537	1	Isoform0016135;Isoform0033298
GO:0044710	single-organism metabolic process	259	5304	0.723606	1	Isoform0000276;Isoform0000424;Isoform0000714;Isoform0001065;Isoform0001390;Isoform0001528;Isoform0001632;Isoform0001707;Isoform0001845;Isoform0001955;Isoform0002154;Isoform0002207;Isoform0002215;Isoform0002797;Isoform0002811;Isoform0003011;Isoform0003053;Isoform0003226;Isoform0003246;Isoform0003310;Isoform0003364;Isoform0003486;Isoform0003689;Isoform0004086;Isoform0004338;Isoform0004483;Isoform00…
GO:0040007	growth	9	210	0.73378	1	Isoform0009294;Isoform0013681;Isoform0013749;Isoform0016543;Isoform0016704;Isoform0016933;Isoform0017370;Isoform0020832;Isoform0035419
GO:1901615	organic hydroxy compound metabolic process	10	232	0.73446	1	Isoform0003364;Isoform0013681;Isoform0017725;Isoform0017966;Isoform0023578;Isoform0027528;Isoform0037885;Isoform0042118;Isoform0051859;Isoform0055089
GO:0015979	photosynthesis	1	26	0.73849	1	Isoform0035711
GO:0006643	membrane lipid metabolic process	2	52	0.74343	1	Isoform0001390;Isoform0043907
GO:0048518	positive regulation of biological process	4	100	0.746404	1	Isoform0000325;Isoform0017725;Isoform0035594;Isoform0042118
GO:0006576	cellular biogenic amine metabolic process	3	77	0.750162	1	Isoform0006220;Isoform0010334;Isoform0010413
GO:0044106	cellular amine metabolic process	3	77	0.750162	1	Isoform0006220;Isoform0010334;Isoform0010413
GO:0030003	cellular cation homeostasis	1	27	0.751649	1	Isoform0027528
GO:0015849	organic acid transport	2	53	0.752908	1	Isoform0003364;Isoform0013681
GO:0046942	carboxylic acid transport	2	53	0.752908	1	Isoform0003364;Isoform0013681
GO:0034220	ion transmembrane transport	10	236	0.753314	1	Isoform0006335;Isoform0030157;Isoform0033276;Isoform0036233;Isoform0043568;Isoform0045736;Isoform0047766;Isoform0054959;Isoform0055232;Isoform0060032
GO:0015748	organophosphate ester transport	2	54	0.762084	1	Isoform0003364;Isoform0007487
GO:0009960	endosperm development	1	28	0.764146	1	Isoform0035419
GO:0006721	terpenoid metabolic process	6	150	0.770734	1	Isoform0001390;Isoform0017966;Isoform0022667;Isoform0043907;Isoform0051859;Isoform0055089
GO:0006714	sesquiterpenoid metabolic process	1	29	0.776014	1	Isoform0022667
GO:0015893	drug transport	1	29	0.776014	1	Isoform0048604
GO:0034754	cellular hormone metabolic process	1	29	0.776014	1	Isoform0041942
GO:0042493	response to drug	1	29	0.776014	1	Isoform0048604
GO:0032879	regulation of localization	5	128	0.7767	1	Isoform0003364;Isoform0017966;Isoform0019434;Isoform0051859;Isoform0055089
GO:0051049	regulation of transport	5	128	0.7767	1	Isoform0003364;Isoform0017966;Isoform0019434;Isoform0051859;Isoform0055089
GO:0048583	regulation of response to stimulus	2	56	0.77955	1	Isoform0017725;Isoform0042118
GO:1901698	response to nitrogen compound	6	153	0.786671	1	Isoform0003364;Isoform0017725;Isoform0017966;Isoform0042118;Isoform0051859;Isoform0055089
GO:0042445	hormone metabolic process	1	30	0.787287	1	Isoform0041942
GO:1901362	organic cyclic compound biosynthetic process	38	849	0.794816	1	Isoform0000276;Isoform0004086;Isoform0006335;Isoform0013681;Isoform0014000;Isoform0016135;Isoform0017069;Isoform0017145;Isoform0017754;Isoform0017966;Isoform0018509;Isoform0019798;Isoform0020582;Isoform0021021;Isoform0021813;Isoform0023578;Isoform0031428;Isoform0033298;Isoform0035594;Isoform0037251;Isoform0037716;Isoform0037885;Isoform0038015;Isoform0038974;Isoform0041469;Isoform0041942;Isoform00…
GO:0055085	transmembrane transport	10	246	0.796344	1	Isoform0006335;Isoform0030157;Isoform0033276;Isoform0036233;Isoform0043568;Isoform0045736;Isoform0047766;Isoform0054959;Isoform0055232;Isoform0060032
GO:0001708	cell fate specification	1	31	0.797992	1	Isoform0035419
GO:0045165	cell fate commitment	1	31	0.797992	1	Isoform0035419
GO:0032787	monocarboxylic acid metabolic process	46	1019	0.798299	1	Isoform0001707;Isoform0001845;Isoform0003364;Isoform0003486;Isoform0004518;Isoform0005886;Isoform0006512;Isoform0006706;Isoform0006851;Isoform0012933;Isoform0017725;Isoform0017966;Isoform0018559;Isoform0018570;Isoform0018680;Isoform0021868;Isoform0022204;Isoform0023556;Isoform0024175;Isoform0025962;Isoform0035574;Isoform0036825;Isoform0037221;Isoform0039831;Isoform0040373;Isoform0040694;Isoform00…
GO:0022402	cell cycle process	8	202	0.801407	1	Isoform0004093;Isoform0005775;Isoform0008968;Isoform0009734;Isoform0021203;Isoform0045577;Isoform0046609;Isoform0047244
GO:0014070	response to organic cyclic compound	6	156	0.801751	1	Isoform0003364;Isoform0013681;Isoform0017966;Isoform0035594;Isoform0051859;Isoform0055089
GO:0051188	cofactor biosynthetic process	10	248	0.804252	1	Isoform0004390;Isoform0006814;Isoform0010293;Isoform0011594;Isoform0014623;Isoform0016544;Isoform0017966;Isoform0051859;Isoform0055089;Isoform0056771
GO:0044699	single-organism process	432	8842	0.806212	1	Isoform0000057;Isoform0000276;Isoform0000325;Isoform0000409;Isoform0000424;Isoform0000714;Isoform0000806;Isoform0000891;Isoform0001065;Isoform0001390;Isoform0001395;Isoform0001439;Isoform0001528;Isoform0001632;Isoform0001707;Isoform0001845;Isoform0001955;Isoform0002154;Isoform0002207;Isoform0002215;Isoform0002797;Isoform0002811;Isoform0003011;Isoform0003053;Isoform0003176;Isoform0003226;Isoform00…
GO:0048522	positive regulation of cellular process	1	33	0.817815	1	Isoform0035594
GO:0006468	protein phosphorylation	5	136	0.819383	1	Isoform0008228;Isoform0017725;Isoform0038844;Isoform0042118;Isoform0054248
GO:0034654	nucleobase-containing compound biosynthetic process	20	474	0.820082	1	Isoform0004086;Isoform0006335;Isoform0014000;Isoform0016135;Isoform0018509;Isoform0020582;Isoform0021021;Isoform0021813;Isoform0033298;Isoform0035594;Isoform0038015;Isoform0038974;Isoform0041469;Isoform0048526;Isoform0052963;Isoform0060598;Isoform0060639;Isoform0060649;Isoform0060666;Isoform0060806
GO:0006862	nucleotide transport	1	34	0.826986	1	Isoform0007487
GO:0043648	dicarboxylic acid metabolic process	3	89	0.831122	1	Isoform0012933;Isoform0042592;Isoform0045290
GO:0048827	phyllome development	3	89	0.831122	1	Isoform0023578;Isoform0035419;Isoform0037885
GO:0009743	response to carbohydrate	6	163	0.833712	1	Isoform0001390;Isoform0003364;Isoform0017966;Isoform0043907;Isoform0051859;Isoform0055089
GO:0006873	cellular ion homeostasis	1	35	0.835695	1	Isoform0027528
GO:0055082	cellular chemical homeostasis	1	35	0.835695	1	Isoform0027528
GO:0060918	auxin transport	1	35	0.835695	1	Isoform0013681
GO:0033554	cellular response to stress	11	280	0.837622	1	Isoform0001390;Isoform0001845;Isoform0003011;Isoform0003310;Isoform0003364;Isoform0009295;Isoform0016118;Isoform0028339;Isoform0043675;Isoform0043907;Isoform0044179
GO:0006595	polyamine metabolic process	2	64	0.838615	1	Isoform0010334;Isoform0010413
GO:0009308	amine metabolic process	3	91	0.842168	1	Isoform0006220;Isoform0010334;Isoform0010413
GO:0006402	mRNA catabolic process	1	36	0.843966	1	Isoform0003237
GO:0008283	cell proliferation	1	36	0.843966	1	Isoform0035419
GO:0016119	carotene metabolic process	1	36	0.843966	1	Isoform0022667
GO:0042214	terpene metabolic process	1	36	0.843966	1	Isoform0022667
GO:0006101	citrate metabolic process	3	92	0.847453	1	Isoform0029788;Isoform0037470;Isoform0040976
GO:0072350	tricarboxylic acid metabolic process	3	92	0.847453	1	Isoform0029788;Isoform0037470;Isoform0040976
GO:0071407	cellular response to organic cyclic compound	5	143	0.851115	1	Isoform0003364;Isoform0017966;Isoform0035594;Isoform0051859;Isoform0055089
GO:0010260	organ senescence	1	37	0.851822	1	Isoform0048287
GO:0019438	aromatic compound biosynthetic process	33	771	0.854151	1	Isoform0000276;Isoform0004086;Isoform0006335;Isoform0014000;Isoform0016135;Isoform0017145;Isoform0017754;Isoform0017966;Isoform0018509;Isoform0019798;Isoform0020582;Isoform0021021;Isoform0021813;Isoform0031428;Isoform0033298;Isoform0035594;Isoform0037251;Isoform0037716;Isoform0038015;Isoform0038974;Isoform0041469;Isoform0044214;Isoform0046239;Isoform0048526;Isoform0051859;Isoform0052963;Isoform00…
GO:0006401	RNA catabolic process	1	38	0.859282	1	Isoform0003237
GO:0006558	L-phenylalanine metabolic process	5	145	0.859283	1	Isoform0017754;Isoform0031428;Isoform0037251;Isoform0044214;Isoform0061496
GO:1902221	erythrose 4-phosphate/phosphoenolpyruvate family amino acid metabolic process	5	145	0.859283	1	Isoform0017754;Isoform0031428;Isoform0037251;Isoform0044214;Isoform0061496
GO:0055080	cation homeostasis	2	69	0.867853	1	Isoform0017906;Isoform0027528
GO:0098771	inorganic ion homeostasis	2	69	0.867853	1	Isoform0017906;Isoform0027528
GO:0071555	cell wall organization	2	70	0.873084	1	Isoform0000766;Isoform0004682
GO:0043269	regulation of ion transport	4	124	0.875583	1	Isoform0017966;Isoform0019434;Isoform0051859;Isoform0055089
GO:0005996	monosaccharide metabolic process	10	270	0.876667	1	Isoform0001845;Isoform0004543;Isoform0011118;Isoform0013118;Isoform0017619;Isoform0021105;Isoform0026324;Isoform0033421;Isoform0036905;Isoform0041296
GO:0019318	hexose metabolic process	7	200	0.880648	1	Isoform0001845;Isoform0004543;Isoform0017619;Isoform0021105;Isoform0026324;Isoform0033421;Isoform0036905
GO:0034655	nucleobase-containing compound catabolic process	1	42	0.885555	1	Isoform0003237
GO:0006074	(1->3)-beta-D-glucan metabolic process	2	73	0.887651	1	Isoform0048621;Isoform0071619
GO:0042592	homeostatic process	7	205	0.895101	1	Isoform0003689;Isoform0007813;Isoform0008425;Isoform0008734;Isoform0010677;Isoform0017906;Isoform0027528
GO:0006637	acyl-CoA metabolic process	1	44	0.896792	1	Isoform0013681
GO:0035383	thioester metabolic process	1	44	0.896792	1	Isoform0013681
GO:0006605	protein targeting	8	231	0.899315	1	Isoform0000325;Isoform0003364;Isoform0017725;Isoform0017966;Isoform0035594;Isoform0042118;Isoform0051859;Isoform0055089
GO:1901701	cellular response to oxygen-containing compound	5	157	0.900764	1	Isoform0003364;Isoform0017966;Isoform0035594;Isoform0051859;Isoform0055089
GO:0010154	fruit development	1	45	0.90199	1	Isoform0035419
GO:0048316	seed development	1	45	0.90199	1	Isoform0035419
GO:0007049	cell cycle	9	260	0.910426	1	Isoform0004093;Isoform0005775;Isoform0008968;Isoform0009734;Isoform0021203;Isoform0023483;Isoform0045577;Isoform0046609;Isoform0047244
GO:0043473	pigmentation	1	47	0.911615	1	Isoform0013681
GO:0043476	pigment accumulation	1	47	0.911615	1	Isoform0013681
GO:0043478	pigment accumulation in response to UV light	1	47	0.911615	1	Isoform0013681
GO:0043479	pigment accumulation in tissues in response to UV light	1	47	0.911615	1	Isoform0013681
GO:0043480	pigment accumulation in tissues	1	47	0.911615	1	Isoform0013681
GO:0009072	aromatic amino acid family metabolic process	5	161	0.912008	1	Isoform0017754;Isoform0031428;Isoform0037251;Isoform0044214;Isoform0061496
GO:1901657	glycosyl compound metabolic process	7	212	0.91283	1	Isoform0001390;Isoform0006335;Isoform0017966;Isoform0041942;Isoform0043907;Isoform0051859;Isoform0055089
GO:0097659	nucleic acid-templated transcription	3	108	0.913222	1	Isoform0016135;Isoform0033298;Isoform0035594
GO:0061024	membrane organization	5	162	0.914638	1	Isoform0026542;Isoform0028916;Isoform0029584;Isoform0045925;Isoform0053592
GO:0050801	ion homeostasis	2	80	0.915817	1	Isoform0017906;Isoform0027528
GO:0006732	coenzyme metabolic process	12	336	0.918541	1	Isoform0004390;Isoform0005848;Isoform0006814;Isoform0010293;Isoform0011594;Isoform0013681;Isoform0014623;Isoform0016544;Isoform0017966;Isoform0051859;Isoform0055089;Isoform0056771
GO:0031399	regulation of protein modification process	1	50	0.924312	1	Isoform0035594
GO:0030001	metal ion transport	13	365	0.927405	1	Isoform0005973;Isoform0007469;Isoform0009295;Isoform0012172;Isoform0014163;Isoform0027528;Isoform0030157;Isoform0033892;Isoform0036233;Isoform0043568;Isoform0045736;Isoform0055232;Isoform0060032
GO:0006739	NADP metabolic process	4	141	0.928414	1	Isoform0005848;Isoform0017966;Isoform0051859;Isoform0055089
GO:0006720	isoprenoid metabolic process	6	195	0.930968	1	Isoform0001390;Isoform0017966;Isoform0022667;Isoform0043907;Isoform0051859;Isoform0055089
GO:0010035	response to inorganic substance	3	115	0.932881	1	Isoform0027528;Isoform0041942;Isoform0048287
GO:0048588	developmental cell growth	1	53	0.935186	1	Isoform0013681
GO:0006498	N-terminal protein lipidation	2	87	0.937246	1	Isoform0001845;Isoform0003237
GO:0031365	N-terminal protein amino acid modification	2	87	0.937246	1	Isoform0001845;Isoform0003237
GO:0009893	positive regulation of metabolic process	1	54	0.938452	1	Isoform0000325
GO:0009117	nucleotide metabolic process	20	537	0.938519	1	Isoform0004086;Isoform0005848;Isoform0006335;Isoform0014000;Isoform0017966;Isoform0020582;Isoform0021021;Isoform0021813;Isoform0038015;Isoform0038974;Isoform0041469;Isoform0048526;Isoform0051859;Isoform0052963;Isoform0055089;Isoform0060598;Isoform0060639;Isoform0060649;Isoform0060666;Isoform0060806
GO:0070838	divalent metal ion transport	4	146	0.939541	1	Isoform0005973;Isoform0007469;Isoform0012172;Isoform0014163
GO:0072511	divalent inorganic cation transport	4	146	0.939541	1	Isoform0005973;Isoform0007469;Isoform0012172;Isoform0014163
GO:0035556	intracellular signal transduction	9	277	0.941464	1	Isoform0003364;Isoform0010846;Isoform0013270;Isoform0017055;Isoform0017966;Isoform0020350;Isoform0048438;Isoform0051859;Isoform0055089
GO:0000280	nuclear division	1	55	0.941553	1	Isoform0014738
GO:0007568	aging	1	55	0.941553	1	Isoform0048287
GO:0015711	organic anion transport	2	89	0.942347	1	Isoform0003364;Isoform0013681
GO:0000302	response to reactive oxygen species	1	56	0.944499	1	Isoform0001845
GO:0048589	developmental growth	1	56	0.944499	1	Isoform0013681
GO:0051052	regulation of DNA metabolic process	1	57	0.947296	1	Isoform0041942
GO:0016049	cell growth	2	92	0.949266	1	Isoform0013681;Isoform0035419
GO:0006753	nucleoside phosphate metabolic process	20	548	0.950217	1	Isoform0004086;Isoform0005848;Isoform0006335;Isoform0014000;Isoform0017966;Isoform0020582;Isoform0021021;Isoform0021813;Isoform0038015;Isoform0038974;Isoform0041469;Isoform0048526;Isoform0051859;Isoform0052963;Isoform0055089;Isoform0060598;Isoform0060639;Isoform0060649;Isoform0060666;Isoform0060806
GO:0046496	nicotinamide nucleotide metabolic process	4	154	0.954107	1	Isoform0005848;Isoform0017966;Isoform0051859;Isoform0055089
GO:0000375	RNA splicing, via transesterification reactions	1	60	0.954871	1	Isoform0000424
GO:0000377	RNA splicing, via transesterification reactions with bulged adenosine as nucleophile	1	60	0.954871	1	Isoform0000424
GO:0019362	pyridine nucleotide metabolic process	4	155	0.955681	1	Isoform0005848;Isoform0017966;Isoform0051859;Isoform0055089
GO:0048285	organelle fission	1	61	0.957146	1	Isoform0014738
GO:0048878	chemical homeostasis	2	96	0.957268	1	Isoform0017906;Isoform0027528
GO:0006779	porphyrin-containing compound biosynthetic process	3	128	0.958915	1	Isoform0017966;Isoform0051859;Isoform0055089
GO:0033014	tetrapyrrole biosynthetic process	3	128	0.958915	1	Isoform0017966;Isoform0051859;Isoform0055089
GO:0048507	meristem development	6	213	0.959824	1	Isoform0001845;Isoform0013270;Isoform0017055;Isoform0020350;Isoform0035419;Isoform0048438
GO:0019439	aromatic compound catabolic process	1	63	0.961358	1	Isoform0003237
GO:0072524	pyridine-containing compound metabolic process	4	159	0.961492	1	Isoform0005848;Isoform0017966;Isoform0051859;Isoform0055089
GO:0006733	oxidoreduction coenzyme metabolic process	4	160	0.96283	1	Isoform0005848;Isoform0017966;Isoform0051859;Isoform0055089
GO:0009755	hormone-mediated signaling pathway	12	370	0.963119	1	Isoform0003364;Isoform0009781;Isoform0013681;Isoform0017694;Isoform0017966;Isoform0023578;Isoform0029159;Isoform0035594;Isoform0037885;Isoform0048036;Isoform0051859;Isoform0055089
GO:0032870	cellular response to hormone stimulus	12	370	0.963119	1	Isoform0003364;Isoform0009781;Isoform0013681;Isoform0017694;Isoform0017966;Isoform0023578;Isoform0029159;Isoform0035594;Isoform0037885;Isoform0048036;Isoform0051859;Isoform0055089
GO:0071495	cellular response to endogenous stimulus	12	370	0.963119	1	Isoform0003364;Isoform0009781;Isoform0013681;Isoform0017694;Isoform0017966;Isoform0023578;Isoform0029159;Isoform0035594;Isoform0037885;Isoform0048036;Isoform0051859;Isoform0055089
GO:0034762	regulation of transmembrane transport	1	64	0.963306	1	Isoform0019434
GO:0034765	regulation of ion transmembrane transport	1	64	0.963306	1	Isoform0019434
GO:0006351	transcription, DNA-templated	2	100	0.964053	1	Isoform0016135;Isoform0033298
GO:0006816	calcium ion transport	2	100	0.964053	1	Isoform0012172;Isoform0014163
GO:0006066	alcohol metabolic process	4	161	0.964125	1	Isoform0013681;Isoform0023578;Isoform0027528;Isoform0037885
GO:0044255	cellular lipid metabolic process	35	912	0.964984	1	Isoform0001390;Isoform0005886;Isoform0006512;Isoform0006706;Isoform0017966;Isoform0018559;Isoform0018680;Isoform0022204;Isoform0022667;Isoform0023556;Isoform0024175;Isoform0025962;Isoform0035574;Isoform0039831;Isoform0040373;Isoform0040694;Isoform0042334;Isoform0042403;Isoform0043219;Isoform0043394;Isoform0043907;Isoform0044191;Isoform0046601;Isoform0046805;Isoform0048287;Isoform0051495;Isoform00…
GO:0009648	photoperiodism	1	65	0.965156	1	Isoform0059413
GO:0044270	cellular nitrogen compound catabolic process	1	65	0.965156	1	Isoform0003237
GO:0046700	heterocycle catabolic process	1	65	0.965156	1	Isoform0003237
GO:1901361	organic cyclic compound catabolic process	1	66	0.966913	1	Isoform0003237
GO:0009639	response to red or far red light	3	135	0.968664	1	Isoform0017966;Isoform0051859;Isoform0055089
GO:0009887	organ morphogenesis	2	104	0.969796	1	Isoform0023578;Isoform0037885
GO:0016071	mRNA metabolic process	1	68	0.970166	1	Isoform0003237
GO:0007017	microtubule-based process	5	195	0.970383	1	Isoform0004093;Isoform0005437;Isoform0008968;Isoform0009734;Isoform0021203
GO:0016310	phosphorylation	7	253	0.973113	1	Isoform0008228;Isoform0017725;Isoform0021868;Isoform0023610;Isoform0038844;Isoform0042118;Isoform0054248
GO:0005982	starch metabolic process	3	140	0.974241	1	Isoform0017966;Isoform0051859;Isoform0055089
GO:0022900	electron transport chain	1	71	0.974456	1	Isoform0035711
GO:0055114	oxidation-reduction process	2	110	0.976784	1	Isoform0035711;Isoform0041942
GO:0009123	nucleoside monophosphate metabolic process	3	143	0.977121	1	Isoform0004086;Isoform0006335;Isoform0014000
GO:0009124	nucleoside monophosphate biosynthetic process	3	143	0.977121	1	Isoform0004086;Isoform0006335;Isoform0014000
GO:0018130	heterocycle biosynthetic process	23	658	0.977301	1	Isoform0004086;Isoform0006335;Isoform0014000;Isoform0016135;Isoform0017966;Isoform0018509;Isoform0020582;Isoform0021021;Isoform0021813;Isoform0033298;Isoform0035594;Isoform0038015;Isoform0038974;Isoform0041469;Isoform0048526;Isoform0051859;Isoform0052963;Isoform0055089;Isoform0060598;Isoform0060639;Isoform0060649;Isoform0060666;Isoform0060806
GO:0006405	RNA export from nucleus	2	112	0.978745	1	Isoform0016135;Isoform0033298
GO:0006497	protein lipidation	2	112	0.978745	1	Isoform0001845;Isoform0003237
GO:0042157	lipoprotein metabolic process	2	112	0.978745	1	Isoform0001845;Isoform0003237
GO:0042158	lipoprotein biosynthetic process	2	112	0.978745	1	Isoform0001845;Isoform0003237
GO:0051168	nuclear export	2	112	0.978745	1	Isoform0016135;Isoform0033298
GO:1901659	glycosyl compound biosynthetic process	4	176	0.979138	1	Isoform0001390;Isoform0006335;Isoform0041942;Isoform0043907
GO:0051239	regulation of multicellular organismal process	6	234	0.979381	1	Isoform0000424;Isoform0001845;Isoform0013270;Isoform0017055;Isoform0020350;Isoform0048438
GO:2000026	regulation of multicellular organismal development	6	234	0.979381	1	Isoform0000424;Isoform0001845;Isoform0013270;Isoform0017055;Isoform0020350;Isoform0048438
GO:0006403	RNA localization	2	113	0.979664	1	Isoform0016135;Isoform0033298
GO:0050657	nucleic acid transport	2	113	0.979664	1	Isoform0016135;Isoform0033298
GO:0050658	RNA transport	2	113	0.979664	1	Isoform0016135;Isoform0033298
GO:0051236	establishment of RNA localization	2	113	0.979664	1	Isoform0016135;Isoform0033298
GO:0006754	ATP biosynthetic process	1	76	0.980281	1	Isoform0006335
GO:0009144	purine nucleoside triphosphate metabolic process	1	76	0.980281	1	Isoform0006335
GO:0009145	purine nucleoside triphosphate biosynthetic process	1	76	0.980281	1	Isoform0006335
GO:0009205	purine ribonucleoside triphosphate metabolic process	1	76	0.980281	1	Isoform0006335
GO:0009206	purine ribonucleoside triphosphate biosynthetic process	1	76	0.980281	1	Isoform0006335
GO:0046034	ATP metabolic process	1	76	0.980281	1	Isoform0006335
GO:0015931	nucleobase-containing compound transport	3	147	0.980488	1	Isoform0007487;Isoform0016135;Isoform0033298
GO:0006091	generation of precursor metabolites and energy	4	178	0.980619	1	Isoform0017966;Isoform0035711;Isoform0051859;Isoform0055089
GO:0006342	chromatin silencing	1	77	0.981276	1	Isoform0000424
GO:0018022	peptidyl-lysine methylation	1	77	0.981276	1	Isoform0000424
GO:0034968	histone lysine methylation	1	77	0.981276	1	Isoform0000424
GO:0045814	negative regulation of gene expression, epigenetic	1	77	0.981276	1	Isoform0000424
GO:0015988	energy coupled proton transmembrane transport, against electrochemical gradient	1	78	0.982221	1	Isoform0006335
GO:0016441	posttranscriptional gene silencing	1	78	0.982221	1	Isoform0000424
GO:0035194	posttranscriptional gene silencing by RNA	1	78	0.982221	1	Isoform0000424
GO:0045892	negative regulation of transcription, DNA-templated	1	78	0.982221	1	Isoform0000424
GO:1903507	negative regulation of nucleic acid-templated transcription	1	78	0.982221	1	Isoform0000424
GO:2000113	negative regulation of cellular macromolecule biosynthetic process	1	78	0.982221	1	Isoform0000424
GO:0019751	polyol metabolic process	1	79	0.983118	1	Isoform0027528
GO:1901700	response to oxygen-containing compound	8	298	0.984411	1	Isoform0001390;Isoform0001845;Isoform0003364;Isoform0017966;Isoform0035594;Isoform0043907;Isoform0051859;Isoform0055089
GO:0050793	regulation of developmental process	6	243	0.984669	1	Isoform0000424;Isoform0001845;Isoform0013270;Isoform0017055;Isoform0020350;Isoform0048438
GO:0009606	tropism	1	81	0.984779	1	Isoform0059413
GO:1902600	hydrogen ion transmembrane transport	1	81	0.984779	1	Isoform0006335
GO:0006970	response to osmotic stress	4	185	0.985059	1	Isoform0001390;Isoform0001845;Isoform0041942;Isoform0043907
GO:0000097	sulfur amino acid biosynthetic process	3	155	0.985856	1	Isoform0001390;Isoform0041942;Isoform0043907
GO:0000902	cell morphogenesis	4	187	0.986138	1	Isoform0001395;Isoform0013681;Isoform0023578;Isoform0037885
GO:0009890	negative regulation of biosynthetic process	1	83	0.986277	1	Isoform0000424
GO:0010558	negative regulation of macromolecule biosynthetic process	1	83	0.986277	1	Isoform0000424
GO:0031327	negative regulation of cellular biosynthetic process	1	83	0.986277	1	Isoform0000424
GO:0042451	purine nucleoside biosynthetic process	1	83	0.986277	1	Isoform0006335
GO:0045934	negative regulation of nucleobase-containing compound metabolic process	1	83	0.986277	1	Isoform0000424
GO:0046129	purine ribonucleoside biosynthetic process	1	83	0.986277	1	Isoform0006335
GO:0051172	negative regulation of nitrogen compound metabolic process	1	83	0.986277	1	Isoform0000424
GO:0051253	negative regulation of RNA metabolic process	1	83	0.986277	1	Isoform0000424
GO:1902679	negative regulation of RNA biosynthetic process	1	83	0.986277	1	Isoform0000424
GO:0006979	response to oxidative stress	1	84	0.986969	1	Isoform0001845
GO:0010468	regulation of gene expression	82	2024	0.987171	1	Isoform0000424;Isoform0000912;Isoform0001129;Isoform0001185;Isoform0001977;Isoform0002266;Isoform0002807;Isoform0003061;Isoform0003237;Isoform0003734;Isoform0004639;Isoform0004793;Isoform0006244;Isoform0007739;Isoform0009295;Isoform0009470;Isoform0009781;Isoform0010039;Isoform0010205;Isoform0010693;Isoform0013246;Isoform0013400;Isoform0014894;Isoform0015235;Isoform0015290;Isoform0016046;Isoform00…
GO:0032774	RNA biosynthetic process	3	158	0.987478	1	Isoform0016135;Isoform0033298;Isoform0035594
GO:0055086	nucleobase-containing small molecule metabolic process	20	615	0.987975	1	Isoform0004086;Isoform0005848;Isoform0006335;Isoform0014000;Isoform0017966;Isoform0020582;Isoform0021021;Isoform0021813;Isoform0038015;Isoform0038974;Isoform0041469;Isoform0048526;Isoform0051859;Isoform0052963;Isoform0055089;Isoform0060598;Isoform0060639;Isoform0060649;Isoform0060666;Isoform0060806
GO:0016192	vesicle-mediated transport	7	279	0.988103	1	Isoform0018875;Isoform0021059;Isoform0026542;Isoform0028916;Isoform0029584;Isoform0045925;Isoform0053592
GO:0009888	tissue development	7	280	0.988481	1	Isoform0001395;Isoform0001845;Isoform0013270;Isoform0017055;Isoform0020350;Isoform0035419;Isoform0048438
GO:0006913	nucleocytoplasmic transport	2	126	0.988613	1	Isoform0016135;Isoform0033298
GO:0051169	nuclear transport	2	126	0.988613	1	Isoform0016135;Isoform0033298
GO:0031324	negative regulation of cellular metabolic process	1	87	0.988845	1	Isoform0000424
GO:0005984	disaccharide metabolic process	3	161	0.98892	1	Isoform0008337;Isoform0016165;Isoform0034606
GO:0009719	response to endogenous stimulus	15	495	0.989314	1	Isoform0003364;Isoform0009781;Isoform0013246;Isoform0013681;Isoform0017694;Isoform0017725;Isoform0017966;Isoform0023578;Isoform0029159;Isoform0035594;Isoform0037885;Isoform0042118;Isoform0048036;Isoform0051859;Isoform0055089
GO:0000096	sulfur amino acid metabolic process	3	163	0.989791	1	Isoform0001390;Isoform0041942;Isoform0043907
GO:0009416	response to light stimulus	9	341	0.99033	1	Isoform0001390;Isoform0001845;Isoform0013681;Isoform0017966;Isoform0036905;Isoform0043907;Isoform0051859;Isoform0055089;Isoform0059413
GO:0065008	regulation of biological quality	11	395	0.990373	1	Isoform0000409;Isoform0003689;Isoform0007813;Isoform0008425;Isoform0008734;Isoform0010677;Isoform0013681;Isoform0017906;Isoform0027528;Isoform0038622;Isoform0041942
GO:0098660	inorganic ion transmembrane transport	1	90	0.99045	1	Isoform0006335
GO:0098662	inorganic cation transmembrane transport	1	90	0.99045	1	Isoform0006335
GO:0005991	trehalose metabolic process	1	91	0.990933	1	Isoform0016165
GO:0008380	RNA splicing	1	91	0.990933	1	Isoform0000424
GO:0048367	shoot system development	3	166	0.990976	1	Isoform0023578;Isoform0035419;Isoform0037885
GO:0009451	RNA modification	1	92	0.99139	1	Isoform0010156
GO:0098655	cation transmembrane transport	1	93	0.991825	1	Isoform0006335
GO:0032989	cellular component morphogenesis	4	201	0.991861	1	Isoform0001395;Isoform0013681;Isoform0023578;Isoform0037885
GO:0006006	glucose metabolic process	2	134	0.992066	1	Isoform0001845;Isoform0036905
GO:0042278	purine nucleoside metabolic process	1	94	0.992238	1	Isoform0006335
GO:0046128	purine ribonucleoside metabolic process	1	94	0.992238	1	Isoform0006335
GO:0006310	DNA recombination	1	97	0.993356	1	Isoform0000424
GO:0048523	negative regulation of cellular process	1	97	0.993356	1	Isoform0000424
GO:0009311	oligosaccharide metabolic process	3	176	0.99404	1	Isoform0008337;Isoform0016165;Isoform0034606
GO:0048513	animal organ development	3	176	0.99404	1	Isoform0023578;Isoform0037885;Isoform0048287
GO:0009126	purine nucleoside monophosphate metabolic process	1	100	0.994313	1	Isoform0006335
GO:0009127	purine nucleoside monophosphate biosynthetic process	1	100	0.994313	1	Isoform0006335
GO:0009167	purine ribonucleoside monophosphate metabolic process	1	100	0.994313	1	Isoform0006335
GO:0009168	purine ribonucleoside monophosphate biosynthetic process	1	100	0.994313	1	Isoform0006335
GO:0006778	porphyrin-containing compound metabolic process	3	178	0.994518	1	Isoform0017966;Isoform0051859;Isoform0055089
GO:0033013	tetrapyrrole metabolic process	3	179	0.994743	1	Isoform0017966;Isoform0051859;Isoform0055089
GO:0007015	actin filament organization	1	102	0.994873	1	Isoform0035832
GO:0009314	response to radiation	9	362	0.994945	1	Isoform0001390;Isoform0001845;Isoform0013681;Isoform0017966;Isoform0036905;Isoform0043907;Isoform0051859;Isoform0055089;Isoform0059413
GO:0060255	regulation of macromolecule metabolic process	82	2091	0.995048	1	Isoform0000424;Isoform0000912;Isoform0001129;Isoform0001185;Isoform0001977;Isoform0002266;Isoform0002807;Isoform0003061;Isoform0003237;Isoform0003734;Isoform0004639;Isoform0004793;Isoform0006244;Isoform0007739;Isoform0009295;Isoform0009470;Isoform0009781;Isoform0010039;Isoform0010205;Isoform0010693;Isoform0013246;Isoform0013400;Isoform0014894;Isoform0015235;Isoform0015290;Isoform0016046;Isoform00…
GO:0071702	organic substance transport	35	1019	0.995103	1	Isoform0000325;Isoform0001845;Isoform0003364;Isoform0004206;Isoform0005383;Isoform0006378;Isoform0006693;Isoform0007487;Isoform0007988;Isoform0013681;Isoform0015569;Isoform0016135;Isoform0017725;Isoform0017966;Isoform0018835;Isoform0020803;Isoform0022305;Isoform0029519;Isoform0029774;Isoform0029992;Isoform0030147;Isoform0033298;Isoform0033423;Isoform0035594;Isoform0036181;Isoform0039010;Isoform00…
GO:0018205	peptidyl-lysine modification	1	103	0.995132	1	Isoform0000424
GO:0009725	response to hormone	12	448	0.995469	1	Isoform0003364;Isoform0009781;Isoform0013681;Isoform0017694;Isoform0017966;Isoform0023578;Isoform0029159;Isoform0035594;Isoform0037885;Isoform0048036;Isoform0051859;Isoform0055089
GO:0006464	cellular protein modification process	141	3382	0.995549	1	Isoform0000424;Isoform0001845;Isoform0002538;Isoform0002783;Isoform0003079;Isoform0003206;Isoform0003237;Isoform0003311;Isoform0003646;Isoform0003712;Isoform0003956;Isoform0004634;Isoform0004963;Isoform0005037;Isoform0006025;Isoform0006456;Isoform0006501;Isoform0007032;Isoform0007328;Isoform0007355;Isoform0007740;Isoform0008021;Isoform0008200;Isoform0008228;Isoform0008562;Isoform0009220;Isoform00…
GO:0006886	intracellular protein transport	8	339	0.995746	1	Isoform0000325;Isoform0003364;Isoform0017725;Isoform0017966;Isoform0035594;Isoform0042118;Isoform0051859;Isoform0055089
GO:0050789	regulation of biological process	144	3451	0.995809	1	Isoform0000325;Isoform0000424;Isoform0000912;Isoform0001129;Isoform0001185;Isoform0001845;Isoform0001977;Isoform0002266;Isoform0002807;Isoform0003061;Isoform0003237;Isoform0003364;Isoform0003734;Isoform0003956;Isoform0004634;Isoform0004639;Isoform0004793;Isoform0005452;Isoform0006244;Isoform0006441;Isoform0007328;Isoform0007739;Isoform0007740;Isoform0007792;Isoform0008021;Isoform0009295;Isoform00…
GO:0030029	actin filament-based process	1	106	0.995833	1	Isoform0035832
GO:0030036	actin cytoskeleton organization	1	106	0.995833	1	Isoform0035832
GO:0030163	protein catabolic process	5	251	0.995974	1	Isoform0017966;Isoform0034646;Isoform0051608;Isoform0051859;Isoform0055089
GO:0044257	cellular protein catabolic process	5	251	0.995974	1	Isoform0017966;Isoform0034646;Isoform0051608;Isoform0051859;Isoform0055089
GO:0044723	single-organism carbohydrate metabolic process	20	662	0.996084	1	Isoform0001632;Isoform0001845;Isoform0004483;Isoform0004543;Isoform0006160;Isoform0008337;Isoform0011118;Isoform0012018;Isoform0013118;Isoform0016165;Isoform0017619;Isoform0021105;Isoform0023610;Isoform0026324;Isoform0033421;Isoform0034606;Isoform0036853;Isoform0036905;Isoform0041296;Isoform0046184
GO:0006650	glycerophospholipid metabolic process	3	186	0.996085	1	Isoform0017966;Isoform0051859;Isoform0055089
GO:0006355	regulation of transcription, DNA-templated	9	372	0.99632	1	Isoform0000424;Isoform0003237;Isoform0016135;Isoform0017966;Isoform0024382;Isoform0033298;Isoform0041942;Isoform0051859;Isoform0055089
GO:1903506	regulation of nucleic acid-templated transcription	9	372	0.99632	1	Isoform0000424;Isoform0003237;Isoform0016135;Isoform0017966;Isoform0024382;Isoform0033298;Isoform0041942;Isoform0051859;Isoform0055089
GO:0036211	protein modification process	141	3399	0.996409	1	Isoform0000424;Isoform0001845;Isoform0002538;Isoform0002783;Isoform0003079;Isoform0003206;Isoform0003237;Isoform0003311;Isoform0003646;Isoform0003712;Isoform0003956;Isoform0004634;Isoform0004963;Isoform0005037;Isoform0006025;Isoform0006456;Isoform0006501;Isoform0007032;Isoform0007328;Isoform0007355;Isoform0007740;Isoform0008021;Isoform0008200;Isoform0008228;Isoform0008562;Isoform0009220;Isoform00…
GO:0009653	anatomical structure morphogenesis	11	431	0.996659	1	Isoform0001395;Isoform0001845;Isoform0013270;Isoform0013681;Isoform0017055;Isoform0020350;Isoform0022667;Isoform0023578;Isoform0035419;Isoform0037885;Isoform0048438
GO:1902582	single-organism intracellular transport	8	347	0.996735	1	Isoform0000325;Isoform0003364;Isoform0017725;Isoform0017966;Isoform0035594;Isoform0042118;Isoform0051859;Isoform0055089
GO:0065007	biological regulation	152	3644	0.996819	1	Isoform0000325;Isoform0000409;Isoform0000424;Isoform0000912;Isoform0001129;Isoform0001185;Isoform0001845;Isoform0001977;Isoform0002266;Isoform0002807;Isoform0003061;Isoform0003237;Isoform0003364;Isoform0003689;Isoform0003734;Isoform0003956;Isoform0004634;Isoform0004639;Isoform0004793;Isoform0005452;Isoform0006244;Isoform0006441;Isoform0007328;Isoform0007739;Isoform0007740;Isoform0007792;Isoform00…
GO:0018193	peptidyl-amino acid modification	1	112	0.996948	1	Isoform0000424
GO:0044265	cellular macromolecule catabolic process	6	290	0.997007	1	Isoform0003237;Isoform0017966;Isoform0034646;Isoform0051608;Isoform0051859;Isoform0055089
GO:0016054	organic acid catabolic process	1	113	0.997102	1	Isoform0012933
GO:0046395	carboxylic acid catabolic process	1	113	0.997102	1	Isoform0012933
GO:2001141	regulation of RNA biosynthetic process	9	380	0.997156	1	Isoform0000424;Isoform0003237;Isoform0016135;Isoform0017966;Isoform0024382;Isoform0033298;Isoform0041942;Isoform0051859;Isoform0055089
GO:0046486	glycerolipid metabolic process	3	194	0.997213	1	Isoform0017966;Isoform0051859;Isoform0055089
GO:0051252	regulation of RNA metabolic process	9	381	0.997247	1	Isoform0000424;Isoform0003237;Isoform0016135;Isoform0017966;Isoform0024382;Isoform0033298;Isoform0041942;Isoform0051859;Isoform0055089
GO:0009199	ribonucleoside triphosphate metabolic process	1	114	0.997248	1	Isoform0006335
GO:0009201	ribonucleoside triphosphate biosynthetic process	1	114	0.997248	1	Isoform0006335
GO:0009141	nucleoside triphosphate metabolic process	1	115	0.997388	1	Isoform0006335
GO:0009142	nucleoside triphosphate biosynthetic process	1	115	0.997388	1	Isoform0006335
GO:0031047	gene silencing by RNA	1	115	0.997388	1	Isoform0000424
GO:0040029	regulation of gene expression, epigenetic	1	117	0.997645	1	Isoform0000424
GO:0050896	response to stimulus	90	2326	0.997926	1	Isoform0000409;Isoform0000424;Isoform0001390;Isoform0001707;Isoform0001845;Isoform0002807;Isoform0003011;Isoform0003310;Isoform0003364;Isoform0003689;Isoform0005037;Isoform0005043;Isoform0005452;Isoform0005502;Isoform0005640;Isoform0005803;Isoform0006244;Isoform0006441;Isoform0006474;Isoform0006599;Isoform0006851;Isoform0007235;Isoform0007792;Isoform0009295;Isoform0009632;Isoform0009701;Isoform00…
GO:0044282	small molecule catabolic process	1	121	0.998086	1	Isoform0012933
GO:0099402	plant organ development	3	205	0.998261	1	Isoform0023578;Isoform0035419;Isoform0037885
GO:0070085	glycosylation	1	125	0.998445	1	Isoform0036853
GO:0034613	cellular protein localization	8	370	0.998502	1	Isoform0000325;Isoform0003364;Isoform0017725;Isoform0017966;Isoform0035594;Isoform0042118;Isoform0051859;Isoform0055089
GO:0070727	cellular macromolecule localization	8	370	0.998502	1	Isoform0000325;Isoform0003364;Isoform0017725;Isoform0017966;Isoform0035594;Isoform0042118;Isoform0051859;Isoform0055089
GO:0007165	signal transduction	26	854	0.998547	1	Isoform0003364;Isoform0005452;Isoform0009781;Isoform0010846;Isoform0011916;Isoform0013270;Isoform0013681;Isoform0017055;Isoform0017694;Isoform0017725;Isoform0017966;Isoform0020350;Isoform0023578;Isoform0029159;Isoform0029441;Isoform0035594;Isoform0037885;Isoform0040815;Isoform0042118;Isoform0048036;Isoform0048438;Isoform0050542;Isoform0051859;Isoform0054248;Isoform0055089;Isoform0059941
GO:0023052	signaling	26	855	0.998582	1	Isoform0003364;Isoform0005452;Isoform0009781;Isoform0010846;Isoform0011916;Isoform0013270;Isoform0013681;Isoform0017055;Isoform0017694;Isoform0017725;Isoform0017966;Isoform0020350;Isoform0023578;Isoform0029159;Isoform0029441;Isoform0035594;Isoform0037885;Isoform0040815;Isoform0042118;Isoform0048036;Isoform0048438;Isoform0050542;Isoform0051859;Isoform0054248;Isoform0055089;Isoform0059941
GO:0044700	single organism signaling	26	855	0.998582	1	Isoform0003364;Isoform0005452;Isoform0009781;Isoform0010846;Isoform0011916;Isoform0013270;Isoform0013681;Isoform0017055;Isoform0017694;Isoform0017725;Isoform0017966;Isoform0020350;Isoform0023578;Isoform0029159;Isoform0029441;Isoform0035594;Isoform0037885;Isoform0040815;Isoform0042118;Isoform0048036;Isoform0048438;Isoform0050542;Isoform0051859;Isoform0054248;Isoform0055089;Isoform0059941
GO:0051186	cofactor metabolic process	12	487	0.998592	1	Isoform0004390;Isoform0005848;Isoform0006814;Isoform0010293;Isoform0011594;Isoform0013681;Isoform0014623;Isoform0016544;Isoform0017966;Isoform0051859;Isoform0055089;Isoform0056771
GO:0006412	translation	3	210	0.9986	1	Isoform0000028;Isoform0006314;Isoform0011410
GO:0000904	cell morphogenesis involved in differentiation	1	128	0.998669	1	Isoform0001395
GO:0044712	single-organism catabolic process	1	128	0.998669	1	Isoform0012933
GO:0007154	cell communication	29	934	0.998707	1	Isoform0001390;Isoform0003364;Isoform0005452;Isoform0009295;Isoform0009781;Isoform0010846;Isoform0011916;Isoform0013270;Isoform0013681;Isoform0017055;Isoform0017694;Isoform0017725;Isoform0017966;Isoform0020350;Isoform0023578;Isoform0029159;Isoform0029441;Isoform0035594;Isoform0037885;Isoform0040815;Isoform0042118;Isoform0043907;Isoform0048036;Isoform0048438;Isoform0050542;Isoform0051859;Isoform00…
GO:0006418	tRNA aminoacylation for protein translation	1	129	0.998737	1	Isoform0011410
GO:0043412	macromolecule modification	142	3502	0.998788	1	Isoform0000424;Isoform0001845;Isoform0002538;Isoform0002783;Isoform0003079;Isoform0003206;Isoform0003237;Isoform0003311;Isoform0003646;Isoform0003712;Isoform0003956;Isoform0004634;Isoform0004963;Isoform0005037;Isoform0006025;Isoform0006456;Isoform0006501;Isoform0007032;Isoform0007328;Isoform0007355;Isoform0007740;Isoform0008021;Isoform0008200;Isoform0008228;Isoform0008562;Isoform0009220;Isoform00…
GO:0009156	ribonucleoside monophosphate biosynthetic process	1	130	0.998801	1	Isoform0006335
GO:0009161	ribonucleoside monophosphate metabolic process	1	130	0.998801	1	Isoform0006335
GO:0019538	protein metabolic process	195	4639	0.998862	1	Isoform0000028;Isoform0000424;Isoform0001341;Isoform0001550;Isoform0001845;Isoform0002538;Isoform0002783;Isoform0002986;Isoform0003079;Isoform0003206;Isoform0003237;Isoform0003249;Isoform0003311;Isoform0003646;Isoform0003712;Isoform0003784;Isoform0003936;Isoform0003956;Isoform0004093;Isoform0004347;Isoform0004634;Isoform0004963;Isoform0005037;Isoform0005313;Isoform0006025;Isoform0006314;Isoform00…
GO:0019637	organophosphate metabolic process	25	840	0.9989	1	Isoform0004086;Isoform0005848;Isoform0006086;Isoform0006335;Isoform0007556;Isoform0014000;Isoform0015014;Isoform0017966;Isoform0020582;Isoform0021021;Isoform0021813;Isoform0027528;Isoform0035556;Isoform0038015;Isoform0038974;Isoform0041469;Isoform0048526;Isoform0051859;Isoform0052963;Isoform0055089;Isoform0060598;Isoform0060639;Isoform0060649;Isoform0060666;Isoform0060806
GO:0009163	nucleoside biosynthetic process	1	133	0.998974	1	Isoform0006335
GO:0042455	ribonucleoside biosynthetic process	1	133	0.998974	1	Isoform0006335
GO:0016458	gene silencing	3	218	0.999011	1	Isoform0000424;Isoform0016046;Isoform0035594
GO:0043043	peptide biosynthetic process	3	220	0.999094	1	Isoform0000028;Isoform0006314;Isoform0011410
GO:0044085	cellular component biogenesis	13	530	0.999115	1	Isoform0005906;Isoform0006115;Isoform0013312;Isoform0022275;Isoform0026925;Isoform0035536;Isoform0036853;Isoform0037609;Isoform0041694;Isoform0047428;Isoform0047700;Isoform0051471;Isoform0058793
GO:0010629	negative regulation of gene expression	3	221	0.999133	1	Isoform0000424;Isoform0016046;Isoform0035594
GO:0019941	modification-dependent protein catabolic process	2	183	0.999178	1	Isoform0034646;Isoform0051608
GO:0043632	modification-dependent macromolecule catabolic process	2	183	0.999178	1	Isoform0034646;Isoform0051608
GO:1901605	alpha-amino acid metabolic process	12	505	0.999198	1	Isoform0014220;Isoform0017754;Isoform0017966;Isoform0023531;Isoform0031428;Isoform0037251;Isoform0040821;Isoform0044214;Isoform0051859;Isoform0052965;Isoform0055089;Isoform0061496
GO:0043087	regulation of GTPase activity	1	138	0.999208	1	Isoform0036905
GO:0072528	pyrimidine-containing compound biosynthetic process	1	138	0.999208	1	Isoform0018509
GO:0019219	regulation of nucleobase-containing compound metabolic process	9	420	0.999252	1	Isoform0000424;Isoform0003237;Isoform0016135;Isoform0017966;Isoform0024382;Isoform0033298;Isoform0041942;Isoform0051859;Isoform0055089
GO:0009889	regulation of biosynthetic process	18	673	0.999267	1	Isoform0000325;Isoform0000424;Isoform0003237;Isoform0010693;Isoform0013312;Isoform0016135;Isoform0017966;Isoform0024382;Isoform0033298;Isoform0035536;Isoform0041942;Isoform0042417;Isoform0047428;Isoform0047700;Isoform0051471;Isoform0051859;Isoform0055089;Isoform0058793
GO:0048608	reproductive structure development	1	140	0.999287	1	Isoform0035419
GO:0061458	reproductive system development	1	140	0.999287	1	Isoform0035419
GO:0006790	sulfur compound metabolic process	7	365	0.999398	1	Isoform0001390;Isoform0013681;Isoform0017966;Isoform0041942;Isoform0043907;Isoform0051859;Isoform0055089
GO:0048468	cell development	2	190	0.999409	1	Isoform0001395;Isoform0013681
GO:0010605	negative regulation of macromolecule metabolic process	3	230	0.999416	1	Isoform0000424;Isoform0016046;Isoform0035594
GO:0030154	cell differentiation	3	231	0.999441	1	Isoform0001395;Isoform0013681;Isoform0035419
GO:0051336	regulation of hydrolase activity	1	146	0.999478	1	Isoform0036905
GO:0019222	regulation of metabolic process	90	2417	0.999531	1	Isoform0000325;Isoform0000424;Isoform0000912;Isoform0001129;Isoform0001185;Isoform0001977;Isoform0002266;Isoform0002807;Isoform0003061;Isoform0003237;Isoform0003734;Isoform0004639;Isoform0004793;Isoform0006244;Isoform0007739;Isoform0009295;Isoform0009470;Isoform0009781;Isoform0010039;Isoform0010205;Isoform0010693;Isoform0013246;Isoform0013312;Isoform0013400;Isoform0014894;Isoform0015235;Isoform00…
GO:0043038	amino acid activation	1	150	0.999576	1	Isoform0011410
GO:0043039	tRNA aminoacylation	1	150	0.999576	1	Isoform0011410
GO:0044272	sulfur compound biosynthetic process	3	238	0.99959	1	Isoform0001390;Isoform0041942;Isoform0043907
GO:0006090	pyruvate metabolic process	8	407	0.999594	1	Isoform0001845;Isoform0003486;Isoform0004518;Isoform0017966;Isoform0021868;Isoform0041942;Isoform0051859;Isoform0055089
GO:0009116	nucleoside metabolic process	1	151	0.999597	1	Isoform0006335
GO:0009119	ribonucleoside metabolic process	1	151	0.999597	1	Isoform0006335
GO:0006518	peptide metabolic process	3	239	0.999608	1	Isoform0000028;Isoform0006314;Isoform0011410
GO:0031326	regulation of cellular biosynthetic process	17	672	0.999656	1	Isoform0000424;Isoform0003237;Isoform0010693;Isoform0013312;Isoform0016135;Isoform0017966;Isoform0024382;Isoform0033298;Isoform0035536;Isoform0041942;Isoform0042417;Isoform0047428;Isoform0047700;Isoform0051471;Isoform0051859;Isoform0055089;Isoform0058793
GO:0016571	histone methylation	1	156	0.999689	1	Isoform0000424
GO:0006479	protein methylation	1	157	0.999705	1	Isoform0000424
GO:0006644	phospholipid metabolic process	3	247	0.999725	1	Isoform0017966;Isoform0051859;Isoform0055089
GO:0007010	cytoskeleton organization	1	161	0.999761	1	Isoform0035832
GO:0009057	macromolecule catabolic process	6	357	0.999761	1	Isoform0003237;Isoform0017966;Isoform0034646;Isoform0051608;Isoform0051859;Isoform0055089
GO:0044271	cellular nitrogen compound biosynthetic process	26	927	0.999773	1	Isoform0000028;Isoform0004086;Isoform0006314;Isoform0006335;Isoform0011410;Isoform0014000;Isoform0016135;Isoform0017966;Isoform0018509;Isoform0020582;Isoform0021021;Isoform0021813;Isoform0033298;Isoform0035594;Isoform0038015;Isoform0038974;Isoform0041469;Isoform0048526;Isoform0051859;Isoform0052963;Isoform0055089;Isoform0060598;Isoform0060639;Isoform0060649;Isoform0060666;Isoform0060806
GO:0051716	cellular response to stimulus	36	1183	0.999779	1	Isoform0001390;Isoform0001845;Isoform0003011;Isoform0003310;Isoform0003364;Isoform0005452;Isoform0009295;Isoform0009781;Isoform0010846;Isoform0011916;Isoform0013270;Isoform0013681;Isoform0016118;Isoform0017055;Isoform0017694;Isoform0017725;Isoform0017966;Isoform0020350;Isoform0023578;Isoform0028339;Isoform0029159;Isoform0029441;Isoform0035594;Isoform0037885;Isoform0040815;Isoform0042118;Isoform00…
GO:0010608	posttranscriptional regulation of gene expression	6	360	0.999787	1	Isoform0000424;Isoform0010693;Isoform0017966;Isoform0042417;Isoform0051859;Isoform0055089
GO:0009892	negative regulation of metabolic process	3	253	0.99979	1	Isoform0000424;Isoform0016046;Isoform0035594
GO:0050794	regulation of cellular process	73	2074	0.999797	1	Isoform0000325;Isoform0000424;Isoform0003237;Isoform0003364;Isoform0003956;Isoform0004634;Isoform0005452;Isoform0007328;Isoform0007740;Isoform0008021;Isoform0009475;Isoform0009781;Isoform0010693;Isoform0010846;Isoform0011916;Isoform0012417;Isoform0012575;Isoform0012895;Isoform0012915;Isoform0013270;Isoform0013312;Isoform0013681;Isoform0014147;Isoform0014766;Isoform0016135;Isoform0016968;Isoform00…
GO:0050790	regulation of catalytic activity	1	166	0.999815	1	Isoform0036905
GO:0009791	post-embryonic development	3	256	0.999817	1	Isoform0010707;Isoform0013681;Isoform0035419
GO:0048869	cellular developmental process	5	334	0.999847	1	Isoform0001395;Isoform0013681;Isoform0023578;Isoform0035419;Isoform0037885
GO:0008213	protein alkylation	1	172	0.999865	1	Isoform0000424
GO:0007275	multicellular organism development	14	618	0.999865	1	Isoform0006115;Isoform0010707;Isoform0013270;Isoform0013681;Isoform0017055;Isoform0020350;Isoform0022275;Isoform0023578;Isoform0026925;Isoform0035419;Isoform0037609;Isoform0037885;Isoform0048287;Isoform0048438
GO:0071310	cellular response to organic substance	12	561	0.999871	1	Isoform0003364;Isoform0009781;Isoform0013681;Isoform0017694;Isoform0017966;Isoform0023578;Isoform0029159;Isoform0035594;Isoform0037885;Isoform0048036;Isoform0051859;Isoform0055089
GO:0070887	cellular response to chemical stimulus	12	562	0.999876	1	Isoform0003364;Isoform0009781;Isoform0013681;Isoform0017694;Isoform0017966;Isoform0023578;Isoform0029159;Isoform0035594;Isoform0037885;Isoform0048036;Isoform0051859;Isoform0055089
GO:0016482	cytoplasmic transport	3	265	0.999878	1	Isoform0003364;Isoform0016135;Isoform0033298
GO:0044702	single organism reproductive process	1	174	0.999878	1	Isoform0035419
GO:0072527	pyrimidine-containing compound metabolic process	1	174	0.999878	1	Isoform0018509
GO:0065009	regulation of molecular function	1	176	0.99989	1	Isoform0036905
GO:0048580	regulation of post-embryonic development	1	179	0.999906	1	Isoform0000424
GO:0043604	amide biosynthetic process	3	277	0.999929	1	Isoform0000028;Isoform0006314;Isoform0011410
GO:0080090	regulation of primary metabolic process	18	757	0.999939	1	Isoform0000424;Isoform0003237;Isoform0010693;Isoform0013312;Isoform0016135;Isoform0017966;Isoform0024382;Isoform0033298;Isoform0035536;Isoform0035594;Isoform0041942;Isoform0042417;Isoform0047428;Isoform0047700;Isoform0051471;Isoform0051859;Isoform0055089;Isoform0058793
GO:0048519	negative regulation of biological process	3	283	0.999946	1	Isoform0000424;Isoform0016046;Isoform0035594
GO:0051603	proteolysis involved in cellular protein catabolic process	2	243	0.999953	1	Isoform0034646;Isoform0051608
GO:0031323	regulation of cellular metabolic process	18	766	0.999954	1	Isoform0000424;Isoform0003237;Isoform0010693;Isoform0013312;Isoform0016135;Isoform0017966;Isoform0024382;Isoform0033298;Isoform0035536;Isoform0035594;Isoform0041942;Isoform0042417;Isoform0047428;Isoform0047700;Isoform0051471;Isoform0051859;Isoform0055089;Isoform0058793
GO:0016570	histone modification	3	288	0.999957	1	Isoform0000424;Isoform0016135;Isoform0033298
GO:0016569	covalent chromatin modification	3	291	0.999963	1	Isoform0000424;Isoform0016135;Isoform0033298
GO:0032446	protein modification by small protein conjugation	3	301	0.999976	1	Isoform0010350;Isoform0019757;Isoform0051608
GO:0043414	macromolecule methylation	1	206	0.999977	1	Isoform0000424
GO:0044707	single-multicellular organism process	18	790	0.999979	1	Isoform0006115;Isoform0010707;Isoform0013270;Isoform0013681;Isoform0017055;Isoform0020350;Isoform0022275;Isoform0022667;Isoform0023578;Isoform0023610;Isoform0026925;Isoform0031533;Isoform0035419;Isoform0037609;Isoform0037885;Isoform0048287;Isoform0048438;Isoform0056612
GO:0006796	phosphate-containing compound metabolic process	94	2677	0.999979	1	Isoform0001319;Isoform0002538;Isoform0002783;Isoform0003311;Isoform0004086;Isoform0004634;Isoform0004963;Isoform0005848;Isoform0006086;Isoform0006335;Isoform0006501;Isoform0007328;Isoform0007556;Isoform0007740;Isoform0008228;Isoform0008562;Isoform0009220;Isoform0010101;Isoform0010767;Isoform0012156;Isoform0012197;Isoform0012575;Isoform0013276;Isoform0013484;Isoform0014000;Isoform0014744;Isoform00…
GO:0032501	multicellular organismal process	18	792	0.99998	1	Isoform0006115;Isoform0010707;Isoform0013270;Isoform0013681;Isoform0017055;Isoform0020350;Isoform0022275;Isoform0022667;Isoform0023578;Isoform0023610;Isoform0026925;Isoform0031533;Isoform0035419;Isoform0037609;Isoform0037885;Isoform0048287;Isoform0048438;Isoform0056612
GO:0032259	methylation	1	209	0.99998	1	Isoform0000424
GO:0008652	cellular amino acid biosynthetic process	3	308	0.999983	1	Isoform0001390;Isoform0041942;Isoform0043907
GO:0042221	response to chemical	27	1047	0.999983	1	Isoform0001390;Isoform0001707;Isoform0001845;Isoform0003364;Isoform0006851;Isoform0009295;Isoform0009781;Isoform0013681;Isoform0017694;Isoform0017725;Isoform0017966;Isoform0018570;Isoform0023578;Isoform0027528;Isoform0029159;Isoform0035594;Isoform0036825;Isoform0037221;Isoform0037885;Isoform0041942;Isoform0042118;Isoform0043907;Isoform0048036;Isoform0048287;Isoform0048604;Isoform0051859;Isoform00…
GO:0006417	regulation of translation	2	264	0.999983	1	Isoform0010693;Isoform0042417
GO:0034248	regulation of cellular amide metabolic process	2	264	0.999983	1	Isoform0010693;Isoform0042417
GO:0044248	cellular catabolic process	7	459	0.999984	1	Isoform0003237;Isoform0012933;Isoform0017966;Isoform0034646;Isoform0051608;Isoform0051859;Isoform0055089
GO:0006793	phosphorus metabolic process	95	2725	0.999987	1	Isoform0001319;Isoform0002538;Isoform0002783;Isoform0003311;Isoform0004086;Isoform0004634;Isoform0004963;Isoform0005848;Isoform0006086;Isoform0006335;Isoform0006501;Isoform0007328;Isoform0007556;Isoform0007740;Isoform0008228;Isoform0008562;Isoform0009220;Isoform0010101;Isoform0010767;Isoform0012156;Isoform0012197;Isoform0012575;Isoform0013276;Isoform0013484;Isoform0013681;Isoform0014000;Isoform00…
GO:0009058	biosynthetic process	113	3144	0.999989	1	Isoform0000028;Isoform0000276;Isoform0000912;Isoform0001390;Isoform0001395;Isoform0001632;Isoform0001845;Isoform0003237;Isoform0004086;Isoform0004390;Isoform0004483;Isoform0005457;Isoform0005886;Isoform0006160;Isoform0006314;Isoform0006335;Isoform0006512;Isoform0006706;Isoform0006814;Isoform0009470;Isoform0009508;Isoform0009781;Isoform0010293;Isoform0011410;Isoform0011594;Isoform0012018;Isoform00…
GO:0019752	carboxylic acid metabolic process	63	1976	0.999989	1	Isoform0001390;Isoform0001707;Isoform0001845;Isoform0003364;Isoform0003486;Isoform0004518;Isoform0005886;Isoform0006512;Isoform0006706;Isoform0006851;Isoform0011410;Isoform0012933;Isoform0014220;Isoform0017725;Isoform0017754;Isoform0017966;Isoform0018559;Isoform0018570;Isoform0018680;Isoform0021868;Isoform0022204;Isoform0023531;Isoform0023556;Isoform0024175;Isoform0025962;Isoform0029788;Isoform00…
GO:0044281	small molecule metabolic process	97	2779	0.999989	1	Isoform0001390;Isoform0001707;Isoform0001845;Isoform0003364;Isoform0003486;Isoform0004086;Isoform0004518;Isoform0004543;Isoform0005848;Isoform0005886;Isoform0006335;Isoform0006512;Isoform0006706;Isoform0006851;Isoform0011118;Isoform0011410;Isoform0012933;Isoform0013118;Isoform0013681;Isoform0014000;Isoform0014220;Isoform0017619;Isoform0017725;Isoform0017754;Isoform0017966;Isoform0018559;Isoform00…
GO:0032268	regulation of cellular protein metabolic process	3	318	0.999989	1	Isoform0010693;Isoform0035594;Isoform0042417
GO:0051246	regulation of protein metabolic process	3	318	0.999989	1	Isoform0010693;Isoform0035594;Isoform0042417
GO:0048731	system development	4	361	0.99999	1	Isoform0023578;Isoform0035419;Isoform0037885;Isoform0048287
GO:0010033	response to organic substance	16	758	0.999991	1	Isoform0001390;Isoform0003364;Isoform0009781;Isoform0013681;Isoform0017694;Isoform0017725;Isoform0017966;Isoform0023578;Isoform0029159;Isoform0035594;Isoform0037885;Isoform0042118;Isoform0043907;Isoform0048036;Isoform0051859;Isoform0055089
GO:0046907	intracellular transport	10	577	0.999992	1	Isoform0000325;Isoform0003364;Isoform0016135;Isoform0017725;Isoform0017966;Isoform0033298;Isoform0035594;Isoform0042118;Isoform0051859;Isoform0055089
GO:0044238	primary metabolic process	406	9349	0.999993	1	Isoform0000028;Isoform0000424;Isoform0001065;Isoform0001341;Isoform0001390;Isoform0001528;Isoform0001550;Isoform0001632;Isoform0001761;Isoform0001845;Isoform0002490;Isoform0002538;Isoform0002682;Isoform0002783;Isoform0002923;Isoform0002931;Isoform0002950;Isoform0002986;Isoform0003011;Isoform0003053;Isoform0003079;Isoform0003206;Isoform0003231;Isoform0003237;Isoform0003249;Isoform0003310;Isoform00…
GO:0009628	response to abiotic stimulus	11	617	0.999994	1	Isoform0001390;Isoform0001845;Isoform0013681;Isoform0017966;Isoform0023610;Isoform0036905;Isoform0041942;Isoform0043907;Isoform0051859;Isoform0055089;Isoform0059413
GO:0044267	cellular protein metabolic process	149	3989	0.999994	1	Isoform0000028;Isoform0000424;Isoform0001845;Isoform0002538;Isoform0002783;Isoform0003079;Isoform0003206;Isoform0003237;Isoform0003311;Isoform0003646;Isoform0003712;Isoform0003956;Isoform0004634;Isoform0004963;Isoform0005037;Isoform0006025;Isoform0006314;Isoform0006456;Isoform0006501;Isoform0007032;Isoform0007328;Isoform0007355;Isoform0007740;Isoform0008021;Isoform0008200;Isoform0008228;Isoform00…
GO:0051649	establishment of localization in cell	10	588	0.999995	1	Isoform0000325;Isoform0003364;Isoform0016135;Isoform0017725;Isoform0017966;Isoform0033298;Isoform0035594;Isoform0042118;Isoform0051859;Isoform0055089
GO:1901576	organic substance biosynthetic process	104	2980	0.999995	1	Isoform0000028;Isoform0000276;Isoform0000912;Isoform0001390;Isoform0001395;Isoform0001632;Isoform0001845;Isoform0003237;Isoform0004086;Isoform0004483;Isoform0005457;Isoform0005886;Isoform0006160;Isoform0006314;Isoform0006335;Isoform0006512;Isoform0006706;Isoform0009470;Isoform0009508;Isoform0009781;Isoform0011410;Isoform0012018;Isoform0013274;Isoform0013400;Isoform0013681;Isoform0014000;Isoform00…
GO:0070647	protein modification by small protein conjugation or removal	3	335	0.999995	1	Isoform0010350;Isoform0019757;Isoform0051608
GO:0043436	oxoacid metabolic process	63	2011	0.999995	1	Isoform0001390;Isoform0001707;Isoform0001845;Isoform0003364;Isoform0003486;Isoform0004518;Isoform0005886;Isoform0006512;Isoform0006706;Isoform0006851;Isoform0011410;Isoform0012933;Isoform0014220;Isoform0017725;Isoform0017754;Isoform0017966;Isoform0018559;Isoform0018570;Isoform0018680;Isoform0021868;Isoform0022204;Isoform0023531;Isoform0023556;Isoform0024175;Isoform0025962;Isoform0029788;Isoform00…
GO:0006399	tRNA metabolic process	1	236	0.999995	1	Isoform0011410
GO:0006082	organic acid metabolic process	63	2012	0.999995	1	Isoform0001390;Isoform0001707;Isoform0001845;Isoform0003364;Isoform0003486;Isoform0004518;Isoform0005886;Isoform0006512;Isoform0006706;Isoform0006851;Isoform0011410;Isoform0012933;Isoform0014220;Isoform0017725;Isoform0017754;Isoform0017966;Isoform0018559;Isoform0018570;Isoform0018680;Isoform0021868;Isoform0022204;Isoform0023531;Isoform0023556;Isoform0024175;Isoform0025962;Isoform0029788;Isoform00…
GO:1901566	organonitrogen compound biosynthetic process	24	1008	0.999995	1	Isoform0000028;Isoform0001390;Isoform0006314;Isoform0006335;Isoform0011410;Isoform0017966;Isoform0018509;Isoform0020582;Isoform0021021;Isoform0021813;Isoform0038015;Isoform0038974;Isoform0041469;Isoform0041942;Isoform0043907;Isoform0048526;Isoform0051859;Isoform0052963;Isoform0055089;Isoform0060598;Isoform0060639;Isoform0060649;Isoform0060666;Isoform0060806
GO:1901575	organic substance catabolic process	7	493	0.999996	1	Isoform0003237;Isoform0012933;Isoform0017966;Isoform0034646;Isoform0051608;Isoform0051859;Isoform0055089
GO:0000003	reproduction	8	529	0.999996	1	Isoform0000424;Isoform0002352;Isoform0003237;Isoform0010707;Isoform0012944;Isoform0013029;Isoform0015804;Isoform0035419
GO:0043623	cellular protein complex assembly	1	243	0.999997	1	Isoform0005906
GO:0016043	cellular component organization	60	1954	0.999997	1	Isoform0000424;Isoform0000766;Isoform0001395;Isoform0001845;Isoform0002490;Isoform0004682;Isoform0005906;Isoform0006115;Isoform0011313;Isoform0013298;Isoform0013312;Isoform0013681;Isoform0013766;Isoform0013978;Isoform0014738;Isoform0016135;Isoform0017966;Isoform0021823;Isoform0022275;Isoform0023578;Isoform0024184;Isoform0026542;Isoform0026925;Isoform0028916;Isoform0029363;Isoform0029584;Isoform00…
GO:0016568	chromatin modification	3	347	0.999997	1	Isoform0000424;Isoform0016135;Isoform0033298
GO:0048856	anatomical structure development	13	702	0.999997	1	Isoform0001395;Isoform0001845;Isoform0013270;Isoform0013681;Isoform0017055;Isoform0020350;Isoform0022667;Isoform0023578;Isoform0035419;Isoform0037885;Isoform0038622;Isoform0048287;Isoform0048438
GO:0044767	single-organism developmental process	18	865	0.999998	1	Isoform0001395;Isoform0001845;Isoform0006115;Isoform0010707;Isoform0013270;Isoform0013681;Isoform0017055;Isoform0020350;Isoform0022275;Isoform0022667;Isoform0023578;Isoform0023610;Isoform0026925;Isoform0035419;Isoform0037609;Isoform0037885;Isoform0048287;Isoform0048438
GO:2000112	regulation of cellular macromolecule biosynthetic process	11	653	0.999998	1	Isoform0000424;Isoform0003237;Isoform0010693;Isoform0016135;Isoform0017966;Isoform0024382;Isoform0033298;Isoform0041942;Isoform0042417;Isoform0051859;Isoform0055089
GO:0006508	proteolysis	3	361	0.999999	1	Isoform0034646;Isoform0035419;Isoform0051608
GO:0051641	cellular localization	10	627	0.999999	1	Isoform0000325;Isoform0003364;Isoform0016135;Isoform0017725;Isoform0017966;Isoform0033298;Isoform0035594;Isoform0042118;Isoform0051859;Isoform0055089
GO:0010556	regulation of macromolecule biosynthetic process	11	661	0.999999	1	Isoform0000424;Isoform0003237;Isoform0010693;Isoform0016135;Isoform0017966;Isoform0024382;Isoform0033298;Isoform0041942;Isoform0042417;Isoform0051859;Isoform0055089
GO:0006259	DNA metabolic process	9	595	0.999999	1	Isoform0000424;Isoform0003011;Isoform0003310;Isoform0016118;Isoform0026911;Isoform0028339;Isoform0043675;Isoform0044179;Isoform0052371
GO:0043603	cellular amide metabolic process	3	367	0.999999	1	Isoform0000028;Isoform0006314;Isoform0011410
GO:0044249	cellular biosynthetic process	102	3016	0.999999	1	Isoform0000028;Isoform0000276;Isoform0000912;Isoform0001390;Isoform0001845;Isoform0003237;Isoform0004086;Isoform0004390;Isoform0005457;Isoform0005886;Isoform0006314;Isoform0006335;Isoform0006512;Isoform0006706;Isoform0006814;Isoform0009470;Isoform0009508;Isoform0009781;Isoform0010293;Isoform0011410;Isoform0011594;Isoform0013274;Isoform0013400;Isoform0014000;Isoform0014623;Isoform0014934;Isoform00…
GO:0071840	cellular component organization or biogenesis	62	2058	0.999999	1	Isoform0000424;Isoform0000766;Isoform0001395;Isoform0001845;Isoform0002490;Isoform0004682;Isoform0005906;Isoform0006115;Isoform0011313;Isoform0013298;Isoform0013312;Isoform0013681;Isoform0013766;Isoform0013978;Isoform0014738;Isoform0016135;Isoform0017966;Isoform0021823;Isoform0022275;Isoform0023578;Isoform0024184;Isoform0026542;Isoform0026925;Isoform0028916;Isoform0029363;Isoform0029584;Isoform00…
GO:0009056	catabolic process	7	532	0.999999	1	Isoform0003237;Isoform0012933;Isoform0017966;Isoform0034646;Isoform0051608;Isoform0051859;Isoform0055089
GO:0034622	cellular macromolecular complex assembly	1	273	0.999999	1	Isoform0005906
GO:0015031	protein transport	11	674	0.999999	1	Isoform0000325;Isoform0001845;Isoform0003364;Isoform0004206;Isoform0007988;Isoform0017725;Isoform0017966;Isoform0035594;Isoform0042118;Isoform0051859;Isoform0055089
GO:0008104	protein localization	18	902	0.999999	1	Isoform0000325;Isoform0001845;Isoform0003364;Isoform0004206;Isoform0007988;Isoform0012423;Isoform0013270;Isoform0016135;Isoform0017055;Isoform0017725;Isoform0017966;Isoform0020350;Isoform0033298;Isoform0035594;Isoform0042118;Isoform0048438;Isoform0051859;Isoform0055089
GO:0045184	establishment of protein localization	11	693	1	1	Isoform0000325;Isoform0001845;Isoform0003364;Isoform0004206;Isoform0007988;Isoform0017725;Isoform0017966;Isoform0035594;Isoform0042118;Isoform0051859;Isoform0055089
GO:0051171	regulation of nitrogen compound metabolic process	11	702	1	1	Isoform0000424;Isoform0003237;Isoform0010693;Isoform0016135;Isoform0017966;Isoform0024382;Isoform0033298;Isoform0041942;Isoform0042417;Isoform0051859;Isoform0055089
GO:0006461	protein complex assembly	1	308	1	1	Isoform0005906
GO:0070271	protein complex biogenesis	1	310	1	1	Isoform0005906
GO:0006520	cellular amino acid metabolic process	16	888	1	1	Isoform0001390;Isoform0011410;Isoform0014220;Isoform0017754;Isoform0017966;Isoform0023531;Isoform0031428;Isoform0037251;Isoform0040821;Isoform0041942;Isoform0043907;Isoform0044214;Isoform0051859;Isoform0052965;Isoform0055089;Isoform0061496
GO:0006325	chromatin organization	3	420	1	1	Isoform0000424;Isoform0016135;Isoform0033298
GO:0009059	macromolecule biosynthetic process	41	1605	1	1	Isoform0000028;Isoform0000912;Isoform0001395;Isoform0001632;Isoform0001845;Isoform0003237;Isoform0004483;Isoform0005457;Isoform0006160;Isoform0006314;Isoform0009470;Isoform0009508;Isoform0009781;Isoform0011410;Isoform0012018;Isoform0013274;Isoform0013400;Isoform0014934;Isoform0015198;Isoform0015235;Isoform0016092;Isoform0016135;Isoform0017694;Isoform0018217;Isoform0028843;Isoform0029159;Isoform00…
GO:0033036	macromolecule localization	18	963	1	1	Isoform0000325;Isoform0001845;Isoform0003364;Isoform0004206;Isoform0007988;Isoform0012423;Isoform0013270;Isoform0016135;Isoform0017055;Isoform0017725;Isoform0017966;Isoform0020350;Isoform0033298;Isoform0035594;Isoform0042118;Isoform0048438;Isoform0051859;Isoform0055089
GO:0044763	single-organism cellular process	257	6593	1	1	Isoform0000276;Isoform0000409;Isoform0000424;Isoform0000806;Isoform0000891;Isoform0001390;Isoform0001395;Isoform0001439;Isoform0001707;Isoform0001845;Isoform0003011;Isoform0003176;Isoform0003310;Isoform0003364;Isoform0003486;Isoform0003689;Isoform0004086;Isoform0004093;Isoform0004518;Isoform0004570;Isoform0005437;Isoform0005452;Isoform0005775;Isoform0005833;Isoform0005848;Isoform0005886;Isoform00…
GO:0032502	developmental process	21	1081	1	1	Isoform0000424;Isoform0001395;Isoform0001845;Isoform0003237;Isoform0006115;Isoform0010707;Isoform0013270;Isoform0013681;Isoform0017055;Isoform0020350;Isoform0022275;Isoform0022667;Isoform0023578;Isoform0023610;Isoform0026925;Isoform0035419;Isoform0037609;Isoform0037885;Isoform0038622;Isoform0048287;Isoform0048438
GO:0065003	macromolecular complex assembly	1	340	1	1	Isoform0005906
GO:0003006	developmental process involved in reproduction	4	496	1	1	Isoform0000424;Isoform0003237;Isoform0010707;Isoform0035419
GO:0022414	reproductive process	4	504	1	1	Isoform0000424;Isoform0003237;Isoform0010707;Isoform0035419
GO:0006396	RNA processing	3	478	1	1	Isoform0000424;Isoform0003237;Isoform0034053
GO:0034645	cellular macromolecule biosynthetic process	34	1522	1	1	Isoform0000028;Isoform0000912;Isoform0001845;Isoform0003237;Isoform0005457;Isoform0006314;Isoform0009470;Isoform0009508;Isoform0009781;Isoform0011410;Isoform0013274;Isoform0013400;Isoform0014934;Isoform0015198;Isoform0015235;Isoform0016092;Isoform0016135;Isoform0017694;Isoform0018217;Isoform0028843;Isoform0029159;Isoform0031533;Isoform0033298;Isoform0034934;Isoform0036763;Isoform0048036;Isoform00…
GO:1901564	organonitrogen compound metabolic process	41	1735	1	1	Isoform0000028;Isoform0001390;Isoform0005848;Isoform0006220;Isoform0006314;Isoform0006335;Isoform0010334;Isoform0010413;Isoform0011410;Isoform0014220;Isoform0017754;Isoform0017966;Isoform0018509;Isoform0020582;Isoform0021021;Isoform0021813;Isoform0023531;Isoform0031428;Isoform0033343;Isoform0033545;Isoform0036327;Isoform0037251;Isoform0038015;Isoform0038974;Isoform0040821;Isoform0041469;Isoform00…
GO:0071822	protein complex subunit organization	2	451	1	1	Isoform0005906;Isoform0035832
GO:0022607	cellular component assembly	1	392	1	1	Isoform0005906
GO:0034660	ncRNA metabolic process	1	404	1	1	Isoform0011410
GO:1902589	single-organism organelle organization	4	574	1	1	Isoform0000424;Isoform0016135;Isoform0033298;Isoform0035832
GO:0051276	chromosome organization	3	536	1	1	Isoform0000424;Isoform0016135;Isoform0033298
GO:0043170	macromolecule metabolic process	302	7789	1	1	Isoform0000028;Isoform0000424;Isoform0000912;Isoform0001341;Isoform0001395;Isoform0001550;Isoform0001632;Isoform0001845;Isoform0002490;Isoform0002538;Isoform0002783;Isoform0002950;Isoform0002986;Isoform0003011;Isoform0003079;Isoform0003206;Isoform0003237;Isoform0003249;Isoform0003310;Isoform0003311;Isoform0003646;Isoform0003712;Isoform0003784;Isoform0003936;Isoform0003956;Isoform0004093;Isoform00…
GO:0044260	cellular macromolecule metabolic process	247	6666	1	1	Isoform0000028;Isoform0000424;Isoform0000912;Isoform0001845;Isoform0002490;Isoform0002538;Isoform0002783;Isoform0002950;Isoform0003011;Isoform0003079;Isoform0003206;Isoform0003237;Isoform0003310;Isoform0003311;Isoform0003646;Isoform0003712;Isoform0003956;Isoform0004634;Isoform0004963;Isoform0005037;Isoform0005457;Isoform0005765;Isoform0006025;Isoform0006115;Isoform0006314;Isoform0006456;Isoform00…
GO:0006996	organelle organization	19	1193	1	1	Isoform0000424;Isoform0001845;Isoform0006115;Isoform0014738;Isoform0016135;Isoform0017966;Isoform0022275;Isoform0026542;Isoform0026925;Isoform0028916;Isoform0029584;Isoform0033298;Isoform0035832;Isoform0037609;Isoform0041942;Isoform0045925;Isoform0051859;Isoform0053592;Isoform0055089
GO:0010467	gene expression	17	1229	1	1	Isoform0000028;Isoform0000424;Isoform0003237;Isoform0005457;Isoform0006314;Isoform0009508;Isoform0010331;Isoform0011410;Isoform0013274;Isoform0014934;Isoform0015198;Isoform0016135;Isoform0018217;Isoform0019320;Isoform0033298;Isoform0034053;Isoform0035224
GO:0071704	organic substance metabolic process	435	10777	1	1	Isoform0000028;Isoform0000276;Isoform0000424;Isoform0000912;Isoform0001065;Isoform0001341;Isoform0001390;Isoform0001395;Isoform0001528;Isoform0001550;Isoform0001632;Isoform0001707;Isoform0001845;Isoform0002490;Isoform0002538;Isoform0002783;Isoform0002950;Isoform0002986;Isoform0003011;Isoform0003053;Isoform0003079;Isoform0003206;Isoform0003237;Isoform0003249;Isoform0003310;Isoform0003311;Isoform00…
GO:1901360	organic cyclic compound metabolic process	71	2834	1	1	Isoform0000276;Isoform0000424;Isoform0003011;Isoform0003237;Isoform0003310;Isoform0003364;Isoform0004086;Isoform0005848;Isoform0006220;Isoform0006335;Isoform0010156;Isoform0011410;Isoform0013681;Isoform0014000;Isoform0016118;Isoform0016135;Isoform0017069;Isoform0017145;Isoform0017725;Isoform0017754;Isoform0017966;Isoform0018509;Isoform0019798;Isoform0020582;Isoform0020854;Isoform0021021;Isoform00…
GO:0006725	cellular aromatic compound metabolic process	65	2737	1	1	Isoform0000276;Isoform0000424;Isoform0002797;Isoform0003011;Isoform0003237;Isoform0003310;Isoform0003364;Isoform0004086;Isoform0005848;Isoform0006220;Isoform0006335;Isoform0010156;Isoform0011410;Isoform0014000;Isoform0016118;Isoform0016135;Isoform0017145;Isoform0017725;Isoform0017754;Isoform0017966;Isoform0018509;Isoform0019798;Isoform0020582;Isoform0020854;Isoform0021021;Isoform0021813;Isoform00…
GO:0043933	macromolecular complex subunit organization	5	878	1	1	Isoform0000424;Isoform0005906;Isoform0016135;Isoform0033298;Isoform0035832
GO:0006139	nucleobase-containing compound metabolic process	37	2270	1	1	Isoform0000424;Isoform0003011;Isoform0003237;Isoform0003310;Isoform0004086;Isoform0005848;Isoform0006335;Isoform0010156;Isoform0011410;Isoform0014000;Isoform0016118;Isoform0016135;Isoform0017966;Isoform0018509;Isoform0020582;Isoform0021021;Isoform0021813;Isoform0026911;Isoform0028339;Isoform0033298;Isoform0034053;Isoform0035594;Isoform0038015;Isoform0038974;Isoform0041469;Isoform0043675;Isoform00…
GO:0006807	nitrogen compound metabolic process	58	3252	1	1	Isoform0000028;Isoform0000424;Isoform0001390;Isoform0003011;Isoform0003237;Isoform0003310;Isoform0004086;Isoform0005848;Isoform0006220;Isoform0006314;Isoform0006335;Isoform0010156;Isoform0010334;Isoform0010413;Isoform0011410;Isoform0014000;Isoform0014220;Isoform0016118;Isoform0016135;Isoform0017754;Isoform0017966;Isoform0018509;Isoform0020582;Isoform0021021;Isoform0021813;Isoform0023531;Isoform00…
GO:0009987	cellular process	526	12835	1	1	Isoform0000028;Isoform0000276;Isoform0000409;Isoform0000424;Isoform0000714;Isoform0000766;Isoform0000806;Isoform0000891;Isoform0000912;Isoform0001319;Isoform0001390;Isoform0001395;Isoform0001439;Isoform0001707;Isoform0001845;Isoform0002490;Isoform0002538;Isoform0002783;Isoform0002797;Isoform0002950;Isoform0003011;Isoform0003079;Isoform0003176;Isoform0003206;Isoform0003237;Isoform0003310;Isoform00…
GO:0016070	RNA metabolic process	8	1093	1	1	Isoform0000424;Isoform0003237;Isoform0010156;Isoform0011410;Isoform0016135;Isoform0033298;Isoform0034053;Isoform0035594
GO:0034641	cellular nitrogen compound metabolic process	46	2675	1	1	Isoform0000028;Isoform0000424;Isoform0003011;Isoform0003237;Isoform0003310;Isoform0004086;Isoform0005848;Isoform0006220;Isoform0006314;Isoform0006335;Isoform0010156;Isoform0010334;Isoform0010413;Isoform0011410;Isoform0014000;Isoform0016118;Isoform0016135;Isoform0017966;Isoform0018509;Isoform0020582;Isoform0021021;Isoform0021813;Isoform0026911;Isoform0028339;Isoform0033298;Isoform0033343;Isoform00…
GO:0044237	cellular metabolic process	383	10224	1	1	Isoform0000028;Isoform0000276;Isoform0000424;Isoform0000714;Isoform0000912;Isoform0001319;Isoform0001390;Isoform0001707;Isoform0001845;Isoform0002490;Isoform0002538;Isoform0002783;Isoform0002797;Isoform0002950;Isoform0003011;Isoform0003079;Isoform0003206;Isoform0003237;Isoform0003310;Isoform0003311;Isoform0003364;Isoform0003486;Isoform0003646;Isoform0003712;Isoform0003956;Isoform0004086;Isoform00…
GO:0046483	heterocycle metabolic process	42	2547	1	1	Isoform0000424;Isoform0003011;Isoform0003237;Isoform0003310;Isoform0004086;Isoform0005848;Isoform0006220;Isoform0006335;Isoform0010156;Isoform0011410;Isoform0014000;Isoform0016118;Isoform0016135;Isoform0017966;Isoform0018509;Isoform0020582;Isoform0021021;Isoform0021813;Isoform0026911;Isoform0028339;Isoform0033298;Isoform0033343;Isoform0033545;Isoform0034053;Isoform0035594;Isoform0036327;Isoform00…
GO:0090304	nucleic acid metabolic process	16	1715	1	1	Isoform0000424;Isoform0003011;Isoform0003237;Isoform0003310;Isoform0010156;Isoform0011410;Isoform0016118;Isoform0016135;Isoform0026911;Isoform0028339;Isoform0033298;Isoform0034053;Isoform0035594;Isoform0043675;Isoform0044179;Isoform0052371
