# Supplementary material for: Global transcriptome changes of elongating internode of sugarcane in response to mepiquat chloride
Source: BMC Genomics. 2021 Jan 25;22:79. doi: 10.1186/s12864-020-07352-w (PMC7831198; doi:10.1186/s12864-020-07352-w)
Supplement: Supplementary file 6 — Additional file 6. Correlations between modules and the groups. (CSV 4 kb) [file 12864_2020_7352_MOESM6_ESM.csv]

	C1	C2	C3	D1	D2	D3
MEpurple	0.0120285316553327	0.932472038695913	0.154907395535587	0.0392973128645761	0.126849000785645	0.191867338306817
MEtan	0.995109995213372	0.36356735868745	0.148115613738663	0.0197604006554746	0.546353962303084	0.293379713366997
MEdarkolivegreen	0.973183339470013	0.48699311091393	0.325994243257812	0.0058150294812843	0.886710666733401	0.489891641360405
MEred	0.481966109283399	0.0375869641433575	0.268781813687181	0.00533523834115377	0.276495085844111	0.215271823039404
MEyellow	0.0027251590420712	0.0858979475648285	0.0528941957540818	0.0690414835068941	0.921568213015179	0.324155554126919
MElightyellow	0.196383013471704	0.00241330868582043	0.19450493207757	0.728579740504916	0.714264677683626	0.895155394564066
MEblue	3.62347577807791e-05	0.37239762203808	0.485144656168724	0.947497985295991	0.280395006026999	0.514594532613391
MEsaddlebrown	0.105195416183709	0.866795440733113	0.727496548080821	0.768617499105603	0.450048803765687	0.120797587968353
MEbrown	0.068478812258087	0.150226289851271	0.504853885101045	0.501038047264309	0.0416304906586991	0.906266146202161
MEmidnightblue	0.159796791093401	0.51296551458585	0.527917470067607	0.487370572372475	0.900059491914359	0.0368882806201371
MEsienna3	0.288091247583461	0.98703935250489	0.230496284385792	0.45876926213786	0.000104904366580577	0.093369816222729
MEturquoise	0.0617278223810332	0.564411918172409	0.465623739362571	0.182738729607741	0.217939106347393	0.559957867723293
MEwhite	0.224195968588004	0.168537851739328	0.250157296117348	0.335792405282839	0.0962400202384119	0.1029895412454
MEdarkorange	0.0483614267774775	0.421070569939461	0.262894165877731	0.151853592189916	0.0182629848999919	0.410891890121786
MEroyalblue	0.0283672073599959	0.877880187526877	0.983468915814675	0.216951943950722	0.00393161693520817	0.56770973327391
MEdarkred	0.120124846521953	0.54407507522982	0.134158861531035	0.0954241027950646	0.0143997005006951	0.983613510597707
MEpink	0.315332811871828	0.873011138829008	0.737685552937883	0.50998685967026	0.00124145314379915	0.534496073858402
MEdarkturquoise	0.78682328406433	0.330140903647045	0.0442935195326729	0.33343000122777	0.0469774405805849	0.76628039330743
MEgreenyellow	0.0893259625255976	0.477205094822977	0.00174138522611884	0.104138715655139	0.8338201073349	0.992902150065084
MEgreen	0.802257394515773	0.774459887184753	0.0794172739960091	0.154752545767764	0.364232330521451	0.244364929598706
MEblack	0.10655457683533	0.682003195554858	0.189196359833338	0.0791359657174435	0.322777563993463	0.00449502730270898
MEgrey60	0.0620799956796696	0.202084647321615	0.0237662007485422	0.268330894609492	0.703008313397055	0.0883677948057679
MEsalmon	0.00240773467298326	0.145341628548674	0.271159896589967	0.996698528860086	0.0410002985949165	0.287117983672578
MEsteelblue	0.141415251612129	0.0574151701693368	0.707130278211082	0.268374036267527	0.171532914983849	0.667900247164386
MEcyan	0.430138694847999	0.0468548716188254	0.854540718641905	0.498036933832291	0.00745630299246126	0.814162723325712
MEmagenta	0.770248649029311	0.00136006662830569	0.849058187113243	0.261765775132087	0.1325220221872	0.768084696055498
MEpaleturquoise	0.319550934138975	0.587031446022305	0.0113946255632347	0.238114505392613	0.235770672610076	0.642579750448973
MEdarkgreen	0.0619072309966063	0.0522168309958193	0.895164412283096	0.385723644013108	0.799088253084038	0.35234791644411
MEdarkmagenta	0.161583255955362	0.0708737295329317	0.535106376935664	0.234432888824951	0.522612797459081	0.0263013695294192
MEviolet	0.0053309204480331	0.120910279637838	0.442428172343684	0.0402636080190143	0.495675103739986	0.130006825139305
MEdarkgrey	0.0941829120979746	0.0272834284221143	0.321514626421921	0.212702261318434	0.518729180619782	0.66106134900918
MEorange	0.409028360503748	0.27161520686471	0.423420373591781	0.477083241820386	0.693448772969082	0.826803672029206
MEskyblue	0.198606245161496	0.821502460913039	0.132928492020794	0.623273439263467	0.243682392488751	0.819155721503908
MElightcyan	0.405007280989493	0.00525049841563808	0.553299619479429	0.869482256806101	0.124104982926011	0.549832210383896
MElightgreen	0.270787846491703	0.00849311391589984	0.731478247243609	0.841658508471074	0.411570128536385	0.742960503103404
MEgrey	0.544659648150061	0.160661745434637	0.0906763688205263	0.81853265223368	0.978392178769115	0.0177003707603528
